# Supplementary material for: Evolving drug discovery using AI, automation, and ASMS through an integrated D-preMTA-MTA strategy for target-focused library exploration
Source: Research Square preprint supplement (doi:10.21203/rs.3.rs-3753964/v1), 2024-02-12
Supplement: Supplementary file 1 [file 4a2c22cc687e46caf1a95927.xlsx]

## Sheet: Remix groups of sub-libraries
Core	Remix groups for ASMS	Compound Name	Content in sub-library	Compound Name	Content in sub-library	Compound Name	Content in sub-library	Compound Name	Content in sub-library
A1 Series	XTN-A1-L1/L3	XTN-A1-L1		XTN-A1-L3
		XTN-A1-022	~0.47%	XTN-A1-079	~2.73%
		XTN-A1-057	~0.76%	XTN-A1-081	~1.82%
		XTN-A1-063	~0.47% (20 mM)	XTN-A1-083	~1.82% (20 mM)
		XTN-A1-084	~0.28%	XTN-A1-086	~1.82%
				XTN-A1-113	~1.82%
	XTN-A1-L2/L5	XTN-A1-L2		XTN-A1-L5
		XTN-A1-049	~5.45%	XTN-A1-089	~3.16%
		XTN-A1-050	~5.45%	XTN-A1-091	~1.05%
		XTN-A1-065	~3.64% (20 mM)	XTN-A1-092	~3.16%
		XTN-A1-067	~1.82%	XTN-A1-093	~1.05%
				XTN-A1-107	~1.58% (20 mM)
	XTN-A1-L4/L6	XTN-A1-L4		XTN-A1-L6
		XTN-A1-061	~1.9%	XTN-A1-088	~2.31%
		XTN-A1-062	~1.3% (20 mM)	XTN-A1-090	~1.54% (20 mM)
		XTN-A1-078	~1.3%	XTN-A1-094	~2.31%
		XTN-A1-080	~1.3%	XTN-A1-109	~0.77%
		XTN-A1-082	~2.3%	XTN-A1-076	~0.57%
		XTN-A1-085	~1.9%
B2 Series	XTN-B2-L1/L2/L3/L5	XTN-B2-L1		XTN-B2-L2		XTN-B2-L3		XTN-B2-L5
		XTN-B2-015	~2.7%	XTN-B2-012	~0.4%	XTN-B2-003	~0.5%	XTN-B2-002	~1.1%
		XTN-B2-019	~2.7% (20 mM)	XTN-B2-013	~0.5%	XTN-B2-043	~0.8%	XTN-B2-034	~0.7%
		XTN-B2-021	~1.3%	XTN-B2-017	~0.4%	XTN-B2-045	~0.2%	XTN-B2-033	~1.0%
		XTN-B2-024	~2.7%	XTN-B2-018	~0.3% (20 mM)	XTN-B2-059	~0.4% (20 mM)	XTN-B2-020	~1.2%
		XTN-B2-068	~2.7%	XTN-B2-040	~0.2%	XTN-B2-074	~0.6%	XTN-B2-041	~0.8% (20 mM)
						XTN-B2-098	~0.4%
	XTN-B2-L4/L8/L9/L12	XTN-B2-L4		XTN-B2-L8		XTN-B2-L9		XTN-B2-L12
		XTN-B2-011	~0.3%	XTN-B2-014	~1.6%	XTN-B2-006	~0.6% (20 mM)	XTN-B2-031	~0.2% (20 mM)
		XTN-B2-062	~0.2%	XTN-B2-027	~0.8% (20 mM)	XTN-B2-025	~0.6%	XTN-B2-061	~0.2%
		XTN-B2-070	~0.3% (20 mM)	XTN-B2-044	~0.6%	XTN-B2-026	~0.6%	XTN-B2-062	~0.2%
		XTN-B2-102	~0.3%	XTN-B2-106	~1.7%	XTN-B2-037	~0.6%	XTN-B2-080	~0.2%
		XTN-B2-104	~0.4%	XTN-B2-112	~1.5%	XTN-B2-051	~0.3%	XTN-B2-085	~0.2%
								XTN-B2-088	~0.2%
	XTN-B2-L6/L7/L11	XTN-B2-L6		XTN-B2-L7		XTN-B2-L11
		XTN-B2-001	~0.8%	XTN-B2-023	~1.8%	XTN-B2-042	~0.1% (20 mM)
		XTN-B2-004	~1.3% (20 mM)	XTN-B2-028	~1.6%	XTN-B2-046	~0.1%
		XTN-B2-052	~1.4%	XTN-B2-036	~0.6%	XTN-B2-053	~0.1%
		XTN-B2-054	~1.5%	XTN-B2-073	~0.7% (20 mM)	XTN-B2-071	~0.1%
		XTN-B2-101	~1.2%	XTN-B2-103	~1.8%	XTN-B2-082	~0.2%
						XTN-B2-097	~0.1%
	XTN-B2-L13/L14/L15/L18	XTN-B2-L13		XTN-B2-L14		XTN-B2-L15		XTN-B2-L18
		XTN-B2-022	~0.3%	XTN-B2-010	~0.2% (20 mM)	XTN-B2-007	~2.5%	XTN-B2-090	~1.0%
		XTN-B2-032	~0.2% (20 mM)	XTN-B2-039	~0.2%	XTN-B2-016	~3.4%	XTN-B2-095	~0.6%
		XTN-B2-056	~0.1%	XTN-B2-050	~0.1%	XTN-B2-057	~0.5%	XTN-B2-108	~1.1%
		XTN-B2-060	~0.1%	XTN-B2-075	~0.3%	XTN-B2-065	~0.5%	XTN-B2-109	~0.7%
		XTN-B2-063	~0.1%	XTN-B2-083	~0.1%	XTN-B2-077	~0.8% (20 mM)	XTN-B2-111	~1.2%
		XTN-B2-084	~0.1%	XTN-B2-086	~0.1%	XTN-B2-081	~0.5%	XTN-B2-116	~0.9% (20 mM)
		XTN-B2-110	~0.2%	XTN-B2-113	~0.1%	XTN-B2-105	~2.6%	XTN-B2-058	~0.7%
	XTN-B2-L10/L16/L17	XTN-B2-L10		XTN-B2-L16		XTN-B2-L17
		XTN-B2-030	~2.1%	XTN-B2-009	~0.5% (20 mM)	XTN-B2-055	~1.0%
		XTN-B2-038	~1.4%	XTN-B2-048	~0.6%	XTN-B2-089	~2.0%
		XTN-B2-047	~1.5%	XTN-B2-091	~0.7%	XTN-B2-096	~2.0%
		XTN-B2-072	~1.4%	XTN-B2-092	~0.5%	XTN-B2-099	~1.4% (20 mM)
		XTN-B2-078	~2.0%	XTN-B2-093	~0.6%	XTN-B2-100	~0.4%
		XTN-B2-076	~1.8% (20 mM)	XTN-B2-094	~0.7%	XTN-B2-107	~1.8%
		XTN-B2-066	~1.3%	XTN-B2-115	~0.8%	XTN-B2-114	~2.9%
C3 Series	XTN-C3-L1/L6/L13	XTN-C3-L1		XTN-C3-L6		XTN-C3-L13
		XTN-C3-017	~2.4%	XTN-C3-009	~1.4% (20 mM)	XTN-C3-045	~2.0% (20 mM)
		XTN-C3-030	~2.4%	XTN-C3-090	~1.6%	XTN-C3-050	~2.7%
		XTN-C3-038	~1.6%	XTN-C3-095	~1.2%	XTN-C3-051	~0.6%
		XTN-C3-046	~2.1% (20 mM)	XTN-C3-104	~1.6%	XTN-C3-052	~2.6%
		XTN-C3-066	~2.7%	XTN-C3-108	~1.8%	XTN-C3-054	~2.6%
				XTN-C3-111	~1.4%	XTN-C3-057	~1.0%
				XTN-C3-116	~1.2%	XTN-C3-059	~2.5%
	XTN-C3-L2/L3/L7/L8	XTN-C3-L2		XTN-C3-L3		XTN-C3-L7		XTN-C3-L8
		XTN-C3-033	~3.33%	XTN-C3-031	~3.33%	XTN-C3-001	~1.48%	XTN-C3-006	~3.33%
		XTN-C3-042	~2.22%	XTN-C3-053	~1.11%	XTN-C3-003	~1.60%	XTN-C3-015	~3.61%
		XTN-C3-047	~2.22%	XTN-C3-072	~3.33%	XTN-C3-004	~1.36% (20 mM)	XTN-C3-026	~3.33%
		XTN-C3-071	~2.22% (20 mM)	XTN-C3-097	~1.11%	XTN-C3-012	~1.48%	XTN-C3-021	~2.78%
				XTN-C3-102	~2.22% (20 mM)	XTN-C3-013	~1.48%	XTN-C3-022	~3.33%
						XTN-C3-014	~1.23%	XTN-C3-023	~3.06% (20 mM)
						XTN-C3-016	~1.36%
	XTN-C3-L4/L9/L10/L16	XTN-C3-L4		XTN-C3-L9		XTN-C3-L10		XTN-C3-L16
		XTN-C3-019	~1.8%	XTN-C3-018	~2.4%	XTN-C3-002	~3.39%	XTN-C3-084	~0.6%
		XTN-C3-024	~1.6%	XTN-C3-075	~2.0%	XTN-C3-007	~3.05% (20 mM)	XTN-C3-085	~1.0%
		XTN-C3-062	~1.7%	XTN-C3-099	~1.7%	XTN-C3-010	~3.05%	XTN-C3-086	~0.9% (20 mM)
		XTN-C3-070	~1.4%	XTN-C3-100	~0.3%	XTN-C3-027	~4.07%	XTN-C3-087	~0.9%
		XTN-C3-088	~1.6% (20 mM)	XTN-C3-107	~1.5% (20 mM)	XTN-C3-028	~4.07%	XTN-C3-098	~0.9%
		XTN-C3-092	~1.7%	XTN-C3-114	~2.1%	XTN-C3-036	~2.37%	XTN-C3-101	~0.9%
		XTN-C3-109	~1.4%	XTN-C3-105	~2.0%			XTN-C3-103	~0.9%
	XTN-C3-L5/L12/L14	XTN-C3-L5		XTN-C3-L12		XTN-C3-L14
		XTN-C3-048	~0.6%	XTN-C3-005	~2.9%	XTN-C3-060	~2.0%
		XTN-C3-055	~1.0%	XTN-C3-008	~3.0%	XTN-C3-061	~1.2%
		XTN-C3-089	~0.8%	XTN-C3-011	~1.5% (20 mM)	XTN-C3-063	~1.3%
		XTN-C3-091	~1.1%	XTN-C3-040	~1.7%	XTN-C3-064	~1.6%
		XTN-C3-093	~0.9% (20 mM)	XTN-C3-041	~1.7%	XTN-C3-065	~1.4% (20 mM)
		XTN-C3-094	~0.8%	XTN-C3-043	~2.1%	XTN-C3-067	~1.1%
		XTN-C3-096	~1.3%	XTN-C3-044	~0.5%	XTN-C3-068	~1.7%
	XTN-C3-L11/L15/L17	XTN-C3-L11		XTN-C3-L15		XTN-C3-L17
		XTN-C3-020	~2.77% (20 mM)	XTN-C3-073	~0.6%	XTN-C3-106	~1.3%
		XTN-C3-025	~3.69%	XTN-C3-074	~1.0%	XTN-C3-110	~1.2%
		XTN-C3-032	~3.69%	XTN-C3-077	~0.8% (20 mM)	XTN-C3-112	~1.4%
		XTN-C3-034	~3.69%	XTN-C3-079	~1.1%	XTN-C3-113	~0.9%
		XTN-C3-037	~2.46%	XTN-C3-081	~0.9%	XTN-C3-115	~1.4%
		XTN-C3-039	~3.69%	XTN-C3-082	~0.8%	XTN-C3-076	~1.1% (20 mM)
				XTN-C3-083	~1.3%	XTN-C3-058	~1.4%
D4 Series	XTN-D4-L1/L4/L11	XTN-D4-L1		XTN-D4-L4		XTN-D4-L11
		XTN-D4-001	~2.12% (20 mM)	XTN-D4-027	~1.11%	XTN-D4-060	~0.43%
		XTN-D4-002	~1.92%	XTN-D4-028	~1.53%	XTN-D4-075	~0.58% (20 mM)
		XTN-D4-003	~2.31%	XTN-D4-031	~1.11%	XTN-D4-082	~0.65%
		XTN-D4-007	~2.12%	XTN-D4-034	~1.53%	XTN-D4-086	~0.58%
		XTN-D4-008	~2.31%	XTN-D4-039	~1.39% (20 mM)	XTN-D4-089	~0.43%
		XTN-D4-010	~1.92%	XTN-D4-041	~1.67%	XTN-D4-092	~0.43%
		XTN-D4-059	~2.31%	XTN-D4-051	~1.37%	XTN-D4-094	~0.58%
						XTN-D4-095	~0.87%
						XTN-D4-096	~0.72%
						XTN-D4-101	~0.72%
						XTN-D4-106	~0.87%
						XTN-D4-109	~0.65%
						XTN-D4-115	~0.87%
						XTN-D4-116	~0.87%
						XTN-D4-076	~0.72%
	XTN-D4-L2/L3/L8	XTN-D4-L2		XTN-D4-L3		XTN-D4-L8
		XTN-D4-011	~2.37%	XTN-D4-019	~0.3% (20 mM)	XTN-D4-045	~2.14% (20 mM)
		XTN-D4-012	~2.37%	XTN-D4-020	~0.3%	XTN-D4-046	~1.84%
		XTN-D4-013	~2.37%	XTN-D4-021	~0.3%	XTN-D4-057	~1.84%
		XTN-D4-014	~2.17% (20 mM)	XTN-D4-022	~0.3%	XTN-D4-062	~2.45%
		XTN-D4-016	~1.58%	XTN-D4-023	~0.3%	XTN-D4-074	~1.84%
		XTN-D4-017	~2.17%	XTN-D4-024	~0.3%	XTN-D4-079	~2.45%
		XTN-D4-018	~1.97%	XTN-D4-026	~0.3%	XTN-D4-081	~2.45%
	XTN-D4-L5/L7/L9/L10	XTN-D4-L5		XTN-D4-L7		XTN-D4-L9		XTN-D4-L10
		XTN-D4-005	~1.56%	XTN-D4-004	~1.33%	XTN-D4-047	~1.08%	XTN-D4-056	~0.72%
		XTN-D4-006	~1.30%	XTN-D4-040	~1.56% (20 mM)	XTN-D4-063	~1.08%	XTN-D4-061	~0.72%
		XTN-D4-015	~1.43% (20 mM)	XTN-D4-042	~1.33%	XTN-D4-065	~1.33%	XTN-D4-085	~0.54%
		XTN-D4-025	~1.43%	XTN-D4-043	~1.78%	XTN-D4-068	~1.20% (20 mM)	XTN-D4-087	~0.66% (20 mM)
		XTN-D4-030	~1.56%	XTN-D4-044	~1.33%	XTN-D4-077	~1.20%	XTN-D4-090	~0.66%
		XTN-D4-032	~1.30%	XTN-D4-050	~1.33%	XTN-D4-083	~1.45%	XTN-D4-097	~0.60%
		XTN-D4-038	~1.43%	XTN-D4-054	~1.33%	XTN-D4-084	~1.45%	XTN-D4-098	~0.72%
						XTN-D4-114	~1.20%	XTN-D4-102	~0.72%
								XTN-D4-103	~0.72%
								XTN-D4-104	~0.60%
								XTN-D4-107	~0.60%
								XTN-D4-108	~0.66%
								XTN-D4-110	~0.66%
								XTN-D4-105	~0.72%
								XTN-D4-066	~0.72%
E5 Series	XTN-E5-L1/L5/L17	XTN-E5-L1		XTN-E5-L5		XTN-E5-L17
		XTN-E5-007	~1.7%	XTN-E5-067	~2.7%	XTN-E5-024	~1.43% (20 mM)
		XTN-E5-008	~6.25%	XTN-E5-075	~1.6%	XTN-E5-026	~1.43%
		XTN-E5-064	~5%	XTN-E5-088	~1.9%	XTN-E5-030	~2.14%
		XTN-E5-087	~3.75% (20 mM)	XTN-E5-090	~2.2% (20 mM)	XTN-E5-033	~1.43%
		XTN-E5-060	~3.1%	XTN-E5-091	~1.6%	XTN-E5-041	~1.43%
		XTN-E5-084	~2.3%			XTN-E5-073	~2.14%
		XTN-E5-096	~4.6%
	XTN-E5-L2/L3	XTN-E5-L2		XTN-E5-L3
		XTN-E5-010	~0.57%	XTN-E5-016	~1.1%
		XTN-E5-022	~0.71%	XTN-E5-057	~1.4% (20 mM)
		XTN-E5-039	~0.43%	XTN-E5-063	~1.4%
		XTN-E5-093	~0.71%	XTN-E5-089	~2.1%
		XTN-E5-094	~0.57% (20 mM)	XTN-E5-113	~1.1%
	XTN-E5-L4/L6	XTN-E5-L4		XTN-E5-L6
		XTN-E5-048	~5.6%	XTN-E5-092	~5.0%
		XTN-E5-049	~4.5%	XTN-E5-109	~5.0%
		XTN-E5-050	~11.3%	XTN-E5-110	~3.7% (20 mM)
		XTN-E5-056	~7.9%	XTN-E5-114	~3.1%
		XTN-E5-065	~6.7% (20 mM)	XTN-E5-099	~3.1%
	XTN-E5-L7/L10/L12/L13	XTN-E5-L7		XTN-E5-L10		XTN-E5-L12		XTN-E5-L13
		XTN-E5-007	~1.7%	XTN-E5-009	~2.0%	XTN-E5-011	~4.0%	XTN-E5-001	~3.5%
		XTN-E5-077	~2.2% (20 mM)	XTN-E5-055	~1.3%	XTN-E5-042	~2.0%	XTN-E5-002	~1.2%
		XTN-E5-079	~1.7%	XTN-E5-062	~2.7%	XTN-E5-101	~3.0% (20 mM)	XTN-E5-004	~1.8% (20 mM)
		XTN-E5-081	~1.7%	XTN-E5-095	~2.0%	XTN-E5-102	~2.5%	XTN-E5-020	~1.8%
		XTN-E5-083	~2.6%	XTN-E5-107	~2.0% (20 mM)	XTN-E5-104	~3.5%	XTN-E5-072	~1.8%
	XTN-E5-L8/L9/L11	XTN-E5-L8		XTN-E5-L9		XTN-E5-L11
		XTN-E5-061	~1.7%	XTN-E5-078	~1.4%	XTN-E5-052	~4.9%
		XTN-E5-069	~1.7%	XTN-E5-082	~3.8%	XTN-E5-070	~4.3%
		XTN-E5-080	~2.3% (20 mM)	XTN-E5-115	~0.8%	XTN-E5-074	~7.3%
		XTN-E5-085	~1.4%	XTN-E5-116	~1.6% (20 mM)	XTN-E5-103	~7.3%
		XTN-E5-086	~2.9%	XTN-E5-076	~1.4%	XTN-E5-112	~6.1% (20 mM)
				XTN-E5-058	~1.1%
	XTN-E5-L14/L16/L18	XTN-E5-L14		XTN-E5-L16		XTN-E5-L18
		XTN-E5-013	~3.5%	XTN-E5-006	~1.3%	XTN-E5-015	~2.73%
		XTN-E5-017	~3.0% (20 mM)	XTN-E5-038	~2.0% (20 mM)	XTN-E5-019	~0.91%
		XTN-E5-023	~3.9%	XTN-E5-054	~2.2%	XTN-E5-032	~0.91%
		XTN-E5-036	~3.0%	XTN-E5-097	~1.3%	XTN-E5-034	~1.82% (20 mM)
		XTN-E5-059	~2.6%	XTN-E5-106	~0.9%	XTN-E5-037	~1.82%
		XTN-E5-105	~3.9%	XTN-E5-108	~2.2%	XTN-E5-068	~1.82%
	XTN-E5-L15/L19	XTN-E5-L15		XTN-E5-L19
		XTN-E5-003	~2.4% (20 mM)	XTN-E5-012	~2.22%
		XTN-E5-014	~4.2%	XTN-E5-047	~2.22%
		XTN-E5-025	~1.8%	XTN-E5-051	~1.11%
		XTN-E5-028	~1.8%	XTN-E5-098	~2.22%
		XTN-E5-031	~3.0%	XTN-E5-111	~1.11%
		XTN-E5-062	~1.8%	XTN-E5-066	~1.11%
				XTN-E5-018	~2.4%
				XTN-E5-021	~2.0%
				XTN-E5-027	~1.5% (20 mM)
F6 Series	XTN-F6-L1/L3	XTN-F6-L1		XTN-F6-L3
		XTN-F6-061	~3.66%	XTN-F6-094	~3.67%
		XTN-F6-062	~2.20%	XTN-F6-095	~2.14%
		XTN-F6-080	~1.83%	XTN-F6-096	~2.45%
		XTN-F6-082	~4.02%	XTN-F6-099	~3.67%
		XTN-F6-089	~3.29% (20 mM)	XTN-F6-107	~3.06% (20 mM)
	XTN-F6-L2/L4/L5/L6	XTN-F6-L2		XTN-F6-L4		XTN-F6-L5		XTN-F6-L6
		XTN-F6-085	~1.43%	XTN-F6-022	~3.33% (20 mM)	XTN-F6-007	~3.00% (20 mM)	XTN-F6-004	~3.33%
		XTN-F6-088	~1.07%	XTN-F6-048	~3.89%	XTN-F6-009	~3.43%	XTN-F6-054	~2.50%
		XTN-F6-090	~1.96%	XTN-F6-109	~2.22%	XTN-F6-010	~3.86%	XTN-F6-108	~3.33%
		XTN-F6-091	~2.14%	XTN-F6-110	~3.33%	XTN-F6-039	~2.57%	XTN-F6-116	~2.92% (20 mM)
		XTN-F6-092	~1.79%	XTN-F6-113	~2.22%	XTN-F6-055	~2.14%	XTN-F6-058	~2.92%
		XTN-F6-093	~1.61% (20 mM)
	XTN-F6-L7/L9/L12/L13	XTN-F6-L7		XTN-F6-L9		XTN-F6-L12		XTN-F6-L13
		XTN-F6-052	~5.19%	XTN-F6-033	~4.38%	XTN-F6-020	~1.43%	XTN-F6-023	~3.00% (20 mM)
		XTN-F6-069	~6.92%	XTN-F6-034	~5.63%	XTN-F6-021	~1.79% (20 mM)	XTN-F6-028	~3.00%
		XTN-F6-114	~5.77% (20 mM)	XTN-F6-070	~5.63%	XTN-F6-036	~1.43%	XTN-F6-038	~3.33%
		XTN-F6-115	~6.35%	XTN-F6-101	~5.00% (20 mM)	XTN-F6-047	~1.43%	XTN-F6-103	~3.00%
		XTN-F6-076	~5.77%	XTN-F6-104	~4.38%	XTN-F6-059	~2.14%	XTN-F6-112	~2.67%
						XTN-F6-066	~1.79%
	XTN-F6-L8/L10/L11/L14	XTN-F6-L8		XTN-F6-L10		XTN-F6-L11		XTN-F6-L14
		XTN-F6-002	~1.67%	XTN-F6-003	~2.84% (20 mM)	XTN-F6-013	~1.92% (20 mM)	XTN-F6-017	~2.33% (20 mM)
		XTN-F6-011	~1.82%	XTN-F6-006	~3.10%	XTN-F6-026	~1.92%	XTN-F6-018	~2.00%
		XTN-F6-075	~1.52% (20 mM)	XTN-F6-012	~2.84%	XTN-F6-027	~2.12%	XTN-F6-025	~3.00%
		XTN-F6-077	~1.67%	XTN-F6-014	~3.10%	XTN-F6-031	~1.92%	XTN-F6-074	~2.33%
		XTN-F6-102	~1.52%	XTN-F6-030	~3.10%	XTN-F6-051	~2.12%	XTN-F6-097	~2.33%
		XTN-F6-105	~1.82%					XTN-F6-106	~3.00%
	XTN-F6-L15/L16/L17/L18	XTN-F6-L15		XTN-F6-L16		XTN-F6-L17		XTN-F6-L18
		XTN-F6-001	~1.67%	XTN-F6-005	~2.94%	XTN-F6-024	~1.80%	XTN-F6-050	~1.42% (20 mM)
		XTN-F6-008	~1.36% (20 mM)	XTN-F6-019	~2.35% (20 mM)	XTN-F6-042	~2.10% (20 mM)	XTN-F6-065	~1.42%
		XTN-F6-015	~1.36%	XTN-F6-032	~2.35%	XTN-F6-060	~2.10%	XTN-F6-067	~3.11%
		XTN-F6-016	~1.21%	XTN-F6-053	~3.53%	XTN-F6-063	~2.10%	XTN-F6-073	~1.42%
		XTN-F6-056	~1.67%	XTN-F6-057	~3.24%	XTN-F6-068	~2.40%	XTN-F6-087	~3.40%
		XTN-F6-079	~1.52%	XTN-F6-064	~2.65%	XTN-F6-081	~2.10%	XTN-F6-098	~3.40%
		XTN-F6-083	~1.21%	XTN-F6-086	~2.94%	XTN-F6-084	~2.40%	XTN-F6-111	~0.08%
