# Supplementary material for: Evolving drug discovery using AI, automation, and ASMS through an integrated D-preMTA-MTA strategy for target-focused library exploration
Source: Research Square preprint supplement (doi:10.21203/rs.3.rs-3753964/v1), 2024-02-12
Supplement: Supplementary file 2 [file 5581424d1adbbc3b635f229a.xlsx]

## Sheet: ASMS results
	Core A1
	OID	smiles	VENDOR_ID	Molecular Formula	MOLECULE_WEIGHT	PTPN2 IC50	Small-scale ASMS	Observed RT (min)	Intensity_ (no treatment)	Intensity (Ultrafiltration)	Intensity (Ultrafiltration after incubation with protein)	efficiency (Small-scale ASMS)	Large-scale ASMS	Observed RT (min) 2	Intensity_ (no treatment) 2	Intensity (Ultrafiltration) 2	Intensity (Ultrafiltration after incubation with protein) 2	efficiency (Large-scale ASMS)
	XTN-A1-L-1	O=C1CN(c2c(OCc3ccccc3)ccc(N3CC(NC(=O)c4cc5ccccc5[nH]4)C3)c2F)S(=O)(=O)N1	XTN-A1-022	C27H24N5O5FS	549.584		Small-scale ASMS	5.02	4499343	651790	732737	0.018	XTN-A1 All	5.02	2007	0	0	0
	XTN-A1-L-1	Cc1cc(C(=O)NC2CN(c3ccc(OCc4ccccc4)c(N4CC(=O)NS4(=O)=O)c3F)C2)no1	XTN-A1-057	C23H22N5O6FS	515.523		Small-scale ASMS	4.68	5056463	923958	642965	-0.056	XTN-A1 All	4.68	4670	614	590	-0.005
	XTN-A1-L-1	Cc1nnsc1C(=O)NC1CN(c2ccc(OCc3ccccc3)c(N3CC(=O)NS3(=O)=O)c2F)C1	XTN-A1-084	C22H21N6O5FS2	532.579		Small-scale ASMS	4.9	8262700	752094	768721	0.002	XTN-A1 All	4.9	4089	498	449	-0.012
	XTN-A1-L-1	O=C1CN(c2c(OCc3ccccc3)ccc(N3CC(NC(=O)c4cnn5cccnc45)C3)c2F)S(=O)(=O)N1	XTN-A1-063	C25H22N7O5FS	551.56		Small-scale ASMS	3.29	8472441	841568	597001	-0.029	XTN-A1 All	3.29	4812	264	141	-0.026
	XTN-A1-L-3	Cc1nc(-c2cccnc2)sc1C(=O)NC1CN(c2ccc(O)c(N3CC(=O)NS3(=O)=O)c2F)C1	XTN-A1-086	C21H19N6O5FS2	518.552		Small-scale ASMS	9.03	30045358	1669198	2669137	0.033	XTN-A1 All	9.03	47498	2388	2569	0.004
	XTN-A1-L-3	Cc1ncsc1C(=O)NC1CN(c2ccc(O)c(N3CC(=O)NS3(=O)=O)c2F)C1	XTN-A1-081	C16H16N5O5FS2	441.466		Small-scale ASMS	8.07	9114358	0	0	0	XTN-A1 All	8.07	14454	832	774	0
	XTN-A1-L-3	O=C1CN(c2c(O)ccc(N3CC(NC(=O)c4cnco4)C3)c2F)S(=O)(=O)N1	XTN-A1-079	C15H14N5O6FS	411.371		Small-scale ASMS	2.4	7401815	0	0	0	XTN-A1 All	2.4	43600	3496	2936	0
	XTN-A1-L-3	O=C1CN(c2c(O)ccc(N3CC(NC(=O)c4cnc(C(F)(F)F)s4)C3)c2F)S(=O)(=O)N1	XTN-A1-113	C16H13N5O5F4S2	495.436		Small-scale ASMS	11.09	36317028	2883910	4554674	0.046	XTN-A1 All	11.09	157717	13501	11867	-0.01
	XTN-A1-L-3	O=C1CN(c2c(O)ccc(N3CC(NC(=O)c4cncs4)C3)c2F)S(=O)(=O)N1	XTN-A1-083	C15H14N5O5FS2	427.439		Small-scale ASMS	7.62	6897674	1189678	1393408	0.03	XTN-A1 All	7.62	65421	5799	5020	-0.012
	XTN-A1-L-4	CC(C)(C)c1cc(C(=O)NC2CN(c3ccc(O)c(N4CC(=O)NS4(=O)=O)c3F)C2)no1	XTN-A1-061	C19H22N5O6FS	467.479		Small-scale ASMS	2.2	3918831	793254	842613	0.013	XTN-A1 All	2.2	2209	185	209	0.011
	XTN-A1-L-4	O=C1CN(c2c(O)ccc(N3CC(NC(=O)c4cnc(-c5ccccc5)s4)C3)c2F)S(=O)(=O)N1	XTN-A1-085	C21H18N5O5FS2	503.537		Small-scale ASMS	2.2	10618467	0	0	0	XTN-A1 All	2.2	4919	480	396	-0.017
	XTN-A1-L-4	Cc1csc(C(=O)NC2CN(c3ccc(O)c(N4CC(=O)NS4(=O)=O)c3F)C2)n1	XTN-A1-078	C16H16N5O5FS2	441.466		Small-scale ASMS	2.17	2869623	1078908	1111189	0.011	XTN-A1 All	2.17	6578	387	271	-0.018
	XTN-A1-L-5	Cn1cc(C(=O)NC2CN(c3ccc(O)c(N4CC(=O)NS4(=O)=O)c3F)C2)c2cccnc21	XTN-A1-107	C20H19N6O5FS	474.474		Small-scale ASMS	2.16	2529170	15318	5318	-0.004	XTN-A1 All	2.16	39010	2040	2429	0.01
	XTN-A1-L-5	O=C1CN(c2c(O)ccc(N3CC(NC(=O)c4csc(-c5cccnc5)n4)C3)c2F)S(=O)(=O)N1	XTN-A1-092	C20H17N6O5FS2	504.525		Small-scale ASMS	8.86	4563672	0	0	0	XTN-A1 All	8.86	1229	95	110	0
	XTN-A1-L-5	Cc1nc(C(=O)NC2CN(c3ccc(O)c(N4CC(=O)NS4(=O)=O)c3F)C2)co1	XTN-A1-091	C16H16N5O6FS	425.398		Small-scale ASMS	9.71	2345764	0	0	0	XTN-A1 All	9.71	402	0	0	0
	XTN-A1-L-5	O=C1CN(c2c(O)ccc(N3CC(NC(=O)c4csc(-c5ccc(F)cc5)n4)C3)c2F)S(=O)(=O)N1	XTN-A1-093	C21H17N5O5F2S2	521.527		Small-scale ASMS	13.67	4659856	321034	831034	0.109	XTN-A1 All	13.67	3059	242	164	-0.026
	XTN-A1-L-6	Cn1cc(C(=O)NC2CN(c3ccc(O)c(N4CC(=O)NS4(=O)=O)c3F)C2)c2ccccc21	XTN-A1-109	C21H20N5O5FS	473.486		Small-scale ASMS	8.38	2776828	10001150	10420075	0.151	XTN-A1 All	8.38	2302	3493	3557	0.028
	XTN-A1-L-6	CC12CC[C@@](C(=O)NC3CN(c4ccc(O)c(N5CC(=O)NS5(=O)=O)c4F)C3)(OC1=O)C2(C)C	XTN-A1-117	C21H25N4O7FS	496.517		Small-scale ASMS	9.55	3104488	0	0	0	XTN-A1 All	0	0	0	0	0
	Core B2
	OID	smiles	VENDOR_ID	Molecular Formula	MOLECULE_WEIGHT	PTPN2 IC50	Small-scale ASMS	Observed RT (min)	Intensity_ (no treatment)	Intensity (Ultrafiltration)	Intensity (Ultrafiltration after incubation with protein)	efficiency (Small-scale ASMS)	Large-scale ASMS	Observed RT (min) 2	Intensity_ (no treatment) 2	Intensity (Ultrafiltration) 2	Intensity (Ultrafiltration after incubation with protein) 2	efficiency (Large-scale ASMS)
	XTN-B2-L-8	COc1ccc2c(C(=O)NCC3CN(c4ccc(O)c(N5CC(=O)NS5(=O)=O)c4F)C3)c[nH]c2c1	XTN-B2-044	C22H22N5O6FS	503.512		Small-scale ASMS	4.91	32909	757	1024	0.008	XTN-B2 All	4.91	11953	3063	5693	0.22
	XTN-B2-L-14	O=C1CN(c2c(O)ccc(N3CC(CNC(=O)c4cncs4)C3)c2F)S(=O)(=O)N1	XTN-B2-083	C16H16N5O5FS2	441.466		Small-scale ASMS	3.71	319	146	209	0.197	XTN-B2 All	3.71	341	161	227	0.194
	XTN-B2-L-13	O=C1CN(c2c(O)ccc(N3CC(CNC(=O)c4cnn5cccnc45)C3)c2F)S(=O)(=O)N1	XTN-B2-063	C19H18N7O5FS	475.462		Small-scale ASMS	2.97	148689	22484	25634	0.021	XTN-B2 All	2.97	138001	0	26167	0.19
	XTN-B2-L-14	Cc1nc(-c2cccnc2)sc1C(=O)NCC1CN(c2ccc(O)c(N3CC(=O)NS3(=O)=O)c2F)C1	XTN-B2-086	C22H21N6O5FS2	532.579		Small-scale ASMS	3.29	103555	3236	5070	0.018	XTN-B2 All	3.29	74394	0	5097	0.069
	XTN-B2-L-8	O=C1CN(c2c(O)ccc(N3CC(CNC(=O)c4cc5cc(C(F)(F)F)ccc5[nH]4)C3)c2F)S(=O)(=O)N1	XTN-B2-112	C22H19N5O5F4S	541.483		Small-scale ASMS	4.96	13532	5345	7186	0.136	XTN-B2 All	4.96	28680	1239	2831	0.056
	XTN-B2-L-14	Cc1ncc(C(=O)NCC2CN(c3ccc(O)c(N4CC(=O)NS4(=O)=O)c3F)C2)s1	XTN-B2-050	C17H18N5O5FS2	455.493		Small-scale ASMS	2.33	14406	279	492	0.015	XTN-B2 All	2.33	9743	190	612	0.043
	XTN-B2-L-5	COc1ccc2[nH]c(C(=O)NCC3CN(c4ccc(O)c(N5CC(=O)NS5(=O)=O)c4F)C3)cc2c1	XTN-B2-034	C22H22N5O6FS	503.512		Small-scale ASMS	8.46	82876040	11292942	8330083	-0.036	XTN-B2 All	8.46	46832	8193	9998	0.039
	XTN-B2-L-16	O=C1CN(c2c(O)ccc(N3CC(CNC(=O)c4cc5ccccc5s4)C3)c2F)S(=O)(=O)N1	XTN-B2-048	C21H19N4O5FS2	490.538		Small-scale ASMS	4.12	1160	148	109	-0.034	XTN-B2 All	4.12	3963	355	477	0.031
	XTN-B2-L-3	Cc1ccc2[nH]cc(C(=O)NCC3CN(c4ccc(O)c(N5CC(=O)NS5(=O)=O)c4F)C3)c2c1	XTN-B2-043	C22H22N5O5FS	487.513		Small-scale ASMS	8.85	11291284	2541898	2192288	-0.03	XTN-B2 All	8.85	826976	48458	71665	0.03
	XTN-B2-L-9	Cc1cccc2cc(C(=O)NCC3CN(c4ccc(O)c(N5CC(=O)NS5(=O)=O)c4F)C3)[nH]c12	XTN-B2-025	C22H22N5O5FS	487.513		Small-scale ASMS	5.15	958423	35119	51534	0.017	XTN-B2 All	5.15	826976	48458	71665	0.028
	XTN-B2-L-7	Cc1ccc2cc(C(=O)NCC3CN(c4ccc(O)c(N5CC(=O)NS5(=O)=O)c4F)C3)[nH]c2c1	XTN-B2-023	C22H22N5O5FS	487.513		Small-scale ASMS	5.13	1198457	74281	78144	0.003	XTN-B2 All	5.13	826976	48458	71665	0.028
	XTN-B2-L-11	Cc1ccc2c(C(=O)NCC3CN(c4ccc(O)c(N5CC(=O)NS5(=O)=O)c4F)C3)c[nH]c2c1	XTN-B2-046	C22H22N5O5FS	487.513		Small-scale ASMS	5.15	1198457	74281	78144	0.003	XTN-B2 All	5.15	826976	48858	71665	0.028
	XTN-B2-L-9	O=C1CN(c2c(O)ccc(N3CC(CNC(=O)c4cc5cc(F)c(F)cc5[nH]4)C3)c2F)S(=O)(=O)N1	XTN-B2-026	C21H18N5O5F3S	509.466		Small-scale ASMS	4.35	24113	14615	16705	0.087	XTN-B2 All	4.35	64343	4588	6286	0.026
	XTN-B2-L-19	CC1CC(C(=O)NCC2CN(c3ccc(O)c(N4CC(=O)NS4(=O)=O)c3F)C2)C1	XTN-B2-005	C18H23N4O5FS	426.47		Small-scale ASMS	3.47	24352	2079	2485	0.017	XTN-B2 All	3.47	8534	697	915	0.026
	XTN-B2-L-11	Nc1c(C(=O)NCC2CN(c3ccc(O)c(N4CC(=O)NS4(=O)=O)c3F)C2)sc2ncccc12	XTN-B2-097	C20H19N6O5FS2	506.541		Small-scale ASMS	4.21	273242	544	590	0	XTN-B2 All	4.21	284133	6310	13005	0.024
	XTN-B2-L-5	O=C1CN(c2c(O)ccc(N3CC(CNC(=O)C4(c5ccccc5F)CCCC4)C3)c2F)S(=O)(=O)N1	XTN-B2-020	C24H26N4O5F2S	520.558		Small-scale ASMS	9.44	68452076	8593979	9484567	0.01	XTN-B2 All	9.44	994477	68935	84849	0.02
	XTN-B2-L-2	O=C1CN(c2c(O)ccc(N3CC(CNC(=O)c4c[nH]c5ccccc45)C3)c2F)S(=O)(=O)N1	XTN-B2-040	C21H20N5O5FS	473.486		Small-scale ASMS	8.39	86462136	19975192	14793104	-0.06	XTN-B2 All	8.39	66086	3716	4984	0.019
	XTN-B2-L-17	Cn1cc(C(=O)NCC2CN(c3ccc(O)c(N4CC(=O)NS4(=O)=O)c3F)C2)c2cccnc21	XTN-B2-107	C21H21N6O5FS	488.501		Small-scale ASMS	3.73	78284	5662	4670	-0.013	XTN-B2 All	3.73	170003	12751	15785	0.018
	XTN-B2-L-18	Nc1c(C(=O)NCC2CN(c3ccc(O)c(N4CC(=O)NS4(=O)=O)c3F)C2)cnn1-c1ccc(F)cc1	XTN-B2-095	C22H21N7O5F2S	533.517		Small-scale ASMS	4.49	70711	3382	4996	0.023	XTN-B2 All	4.49	73351	4029	5270	0.017
	XTN-B2-L-7	O=C1CN(c2c(O)ccc(N3CC(CNC(=O)c4cc5sccc5[nH]4)C3)c2F)S(=O)(=O)N1	XTN-B2-073	C19H18N5O5FS2	479.515		Small-scale ASMS	4.5	175656	1231	1209	0	XTN-B2 All	4.49	41488	708	1318	0.015
	XTN-B2-L-14	O=C1CN(c2c(O)ccc(N3CC(CNC(=O)c4cnn5c4CCCC5)C3)c2F)S(=O)(=O)N1	XTN-B2-010	C20H23N6O5FS	478.506		Small-scale ASMS	3.6	138819	8018	12118	0.03	XTN-B2 All	3.6	84797	10295	11481	0.014
	XTN-B2-L-13	O=C1CN(c2c(O)ccc(N3CC(CNC(=O)c4cc5c(s4)CCCC5)C3)c2F)S(=O)(=O)N1	XTN-B2-110	C21H23N4O5FS2	494.57		Small-scale ASMS	4.43	258942	18884	29884	0.042	XTN-B2 All	4.43	202146	22968	25392	0.012
	XTN-B2-L-13	O=C1CN(c2c(O)ccc(N3CC(CNC(=O)c4cnoc4)C3)c2F)S(=O)(=O)N1	XTN-B2-060	C16H16N5O6FS	425.398		Small-scale ASMS	4.71	54881	3695	5493	0.033	XTN-B2 All	4.71	29513	4991	5304	0.011
	XTN-B2-L-18	Cc1nc(C(=O)NCC2CN(c3ccc(O)c(N4CC(=O)NS4(=O)=O)c3F)C2)c(C)o1	XTN-B2-090	C18H20N5O6FS	453.452		Small-scale ASMS	2.69	1165	98	131	0.028	XTN-B2 All	2.69	1050	146	156	0.01
	XTN-B2-L-14	O=C1CN(c2c(O)ccc(N3CC(CNC(=O)c4csc5ccccc45)C3)c2F)S(=O)(=O)N1	XTN-B2-039	C21H19N4O5FS2	490.538		Small-scale ASMS	3.85	138229	7583	11422	0.028	XTN-B2 All	3.85	106988	9835	10480	0.006
	XTN-B2-L-1	O=C1CN(c2c(O)ccc(N3CC(CNC(=O)C4(c5ccccc5)CCCC4)C3)c2F)S(=O)(=O)N1	XTN-B2-021	C24H27N4O5FS	502.568		Small-scale ASMS	9.39	18311332	1151421	1055125	-0.005	XTN-B2 All	9.39	17926	430	507	0.004
	XTN-B2-L-12	O=C1CN(c2c(O)ccc(N3CC(CNC(=O)c4cnc(-c5ccccc5)s4)C3)c2F)S(=O)(=O)N1	XTN-B2-085	C22H20N5O5FS2	517.564		Small-scale ASMS	4.21	215	94	146	0.242	XTN-B2 All	0	0	0	0	0
	XTN-B2-L-9	Nc1ncc(C(=O)NCC2CN(c3ccc(O)c(N4CC(=O)NS4(=O)=O)c3F)C2)s1	XTN-B2-051	C16H17N6O5FS2	456.481		Small-scale ASMS	6.62	1143	105	289	0.161	XTN-B2 All	6.62	3182	212	234	0
	XTN-B2-L-15	Cc1ncsc1C(=O)NCC1CN(c2ccc(O)c(N3CC(=O)NS3(=O)=O)c2F)C1	XTN-B2-081	C17H18N5O5FS2	455.493		Small-scale ASMS	2.89	238	98	130	0.134	XTN-B2 All	2.88	684	0	625	0
	XTN-B2-L-6	O=C1CN(c2c(O)ccc(N3CC(CNC(=O)C4(O)CCC4)C3)c2F)S(=O)(=O)N1	XTN-B2-001	C17H21N4O6FS	428.442		Small-scale ASMS	4.71	3125	0	412	0.132	XTN-B2 All	0	0	0	0	0
	XTN-B2-L-4	Cn1cc(C(=O)NCC2CN(c3ccc(O)c(N4CC(=O)NS4(=O)=O)c3F)C2)cn1	XTN-B2-062	C17H19N6O5FS	438.441		Small-scale ASMS	2.68	8068	7700	8186	0.06	XTN-B2 All	2.68	40662	3105	2833	0
	XTN-B2-L-18	Cn1nc(C(=O)NCC2CN(c3ccc(O)c(N4CC(=O)NS4(=O)=O)c3F)C2)c2cccnc21	XTN-B2-108	C20H20N7O5FS	489.489		Small-scale ASMS	3.16	1974	142	253	0.056	XTN-B2 All	3.16	1485	0	290	0
	XTN-B2-L-4	O=C1CN(c2c(O)ccc(N3CC(CNC(=O)C4(F)CC4)C3)c2F)S(=O)(=O)N1	XTN-B2-102	C16H18N4O5F2S	416.406		Small-scale ASMS	3.69	5535	246	483	0.043	XTN-B2 All	0	0	0	0	0
	XTN-B2-L-18	Cn1cc(C(=O)NCC2CN(c3ccc(O)c(N4CC(=O)NS4(=O)=O)c3F)C2)c2ccccc21	XTN-B2-109	C22H22N5O5FS	487.513		Small-scale ASMS	5.05	28793	860	1976	0.039	XTN-B2 All	5.05	114247	15745	14698	0
	XTN-B2-L-4	CN1CCC(C(=O)NCC2CN(c3ccc(O)c(N4CC(=O)NS4(=O)=O)c3F)C2)C1=O	XTN-B2-011	C18H22N5O6FS	455.468		Small-scale ASMS	3.56	794	79	106	0.034	XTN-B2 All	0	0	0	0	0
	XTN-B2-L-15	O=C1CN(c2c(O)ccc(N3CC(CNC(=O)C4CC(=O)N(Cc5ccccc5)C4)C3)c2F)S(=O)(=O)N1	XTN-B2-077	C24H26N5O6FS	531.566		Small-scale ASMS	3.66	131	97	100	0.023	XTN-B2 All	0	0	0	0	0
	XTN-B2-L-14	O=C1CN(c2c(O)ccc(N3CC(CNC(=O)c4cnc(C(F)(F)F)s4)C3)c2F)S(=O)(=O)N1	XTN-B2-113	C17H15N5O5F4S2	509.463		Small-scale ASMS	3.31	4045	177	270	0.023	XTN-B2 All	3.31	2395	0	229	0
	XTN-B2-L-13	O=C1CN(c2c(O)ccc(N3CC(CNC(=O)c4cc5cc(F)cc(F)c5[nH]4)C3)c2F)S(=O)(=O)N1	XTN-B2-032	C21H18N5O5F3S	509.466		Small-scale ASMS	4.14	9294	547	676	0.014	XTN-B2 All	4.14	5511	651	584	0
	XTN-B2-L-19	Cc1nc(-c2ccccc2)sc1C(=O)NCC1CN(c2ccc(O)c(N3CC(=O)NS3(=O)=O)c2F)C1	XTN-B2-087	C23H22N5O5FS2	531.591		Small-scale ASMS	6.18	61872	2729	3507	0.013	XTN-B2 All	6.18	33033	0	0	0
	XTN-B2-L-13	O=C1CN(c2c(O)ccc(N3CC(CNC(=O)c4cc5ccccc5[nH]4)C3)c2F)S(=O)(=O)N1	XTN-B2-022	C21H20N5O5FS	473.486		Small-scale ASMS	4.69	34776	84	444	0.01	XTN-B2 All	0	0	0	0	0
	XTN-B2-L-16	O=C1CN(c2c(O)ccc(N3CC(CNC(=O)c4cnn5c4CCC5)C3)c2F)S(=O)(=O)N1	XTN-B2-009	C19H21N6O5FS	464.479		Small-scale ASMS	3.81	64660	163	830	0.01	XTN-B2 All	3.81	55953	0	0	0
	XTN-B2-L-6	O=C1CN(c2c(O)ccc(N3CC(CNC(=O)C4CCCC4)C3)c2F)S(=O)(=O)N1	XTN-B2-052	C18H23N4O5FS	426.47		Small-scale ASMS	7.09	1550	238	251	0.008	XTN-B2 All	7.09	1330	0	224	0
	XTN-B2-L-13	Cc1nnsc1C(=O)NCC1CN(c2ccc(O)c(N3CC(=O)NS3(=O)=O)c2F)C1	XTN-B2-084	C16H17N6O5FS2	456.481		Small-scale ASMS	2.13	8955	224	289	0.007	XTN-B2 All	2.13	6396	262	288	0
	XTN-B2-L-15	Cc1oncc1C(=O)NCC1CN(c2ccc(O)c(N3CC(=O)NS3(=O)=O)c2F)C1	XTN-B2-057	C17H18N5O6FS	439.425		Small-scale ASMS	2.11	9222	195	261	0.007	XTN-B2 All	2.11	6184	0	352	0
	XTN-B2-L-13	Cc1nocc1C(=O)NCC1CN(c2ccc(O)c(N3CC(=O)NS3(=O)=O)c2F)C1	XTN-B2-056	C17H18N5O6FS	439.425		Small-scale ASMS	5.01	3961	320	327	0.002	XTN-B2 All	5.01	2805	0	146	0
	XTN-B2-L-19	O=C1CN(c2c(O)ccc(N3CC(CNC(=O)c4cnn(Cc5ccccc5)c4)C3)c2F)S(=O)(=O)N1	XTN-B2-064	C23H23N6O5FS	514.539		Small-scale ASMS	5.27	53769	3743	3872	0.002	XTN-B2 All	5.27	268173	0	0	0
	XTN-B2-L-11	O=C1CN(c2c(O)ccc(N3CC(CNC(=O)c4c[nH]c5cccnc45)C3)c2F)S(=O)(=O)N1	XTN-B2-042	C20H19N6O5FS	474.474		Small-scale ASMS	3.1	54132	53950	54079	0.002	XTN-B2 All	3.1	62579	17564	7512	0
	XTN-B2-L-15	COc1ccc(C2CC2C(=O)NCC2CN(c3ccc(O)c(N4CC(=O)NS4(=O)=O)c3F)C2)cc1	XTN-B2-007	C23H25N4O6FS	504.54		Small-scale ASMS	5.27	684069	2113	2507	0.001	XTN-B2 All	5.27	549664	9063	3557	0
	XTN-B2-L-6	Cc1nc(O)sc1C(=O)NCC1CN(c2ccc(O)c(N3CC(=O)NS3(=O)=O)c2F)C1	XTN-B2-054	C17H18N5O6FS2	471.492		Small-scale ASMS	4.6	91	0	0	0	XTN-B2 All	0	0	0	0	0
	XTN-B2-L-4	O=C1CN(c2c(O)ccc(N3CC(CNC(=O)c4c[nH]nn4)C3)c2F)S(=O)(=O)N1	XTN-B2-070	C15H16N7O5FS	425.402		Small-scale ASMS	3.06	99	0	0	0	XTN-B2 All	3.06	236	0	0	0
	XTN-B2-L-12	O=C1CN(c2c(O)ccc(N3CC(CNC(=O)c4nccs4)C3)c2F)S(=O)(=O)N1	XTN-B2-080	C16H16N5O5FS2	441.466		Small-scale ASMS	2.1	173	0	0	0	XTN-B2 All	0	0	0	0	0
	XTN-B2-L-6	CC(=O)N1C[C@H](O)C[C@H]1C(=O)NCC1CN(c2ccc(O)c(N3CC(=O)NS3(=O)=O)c2F)C1	XTN-B2-004	C19H24N5O7FS	485.494		Small-scale ASMS	4.41	367	0	0	0	XTN-B2 All	0	0	0	0	0
	XTN-B2-L-15	O=C1CN(c2c(O)ccc(N3CC(CNC(=O)C4(C(F)(F)F)CC4)C3)c2F)S(=O)(=O)N1	XTN-B2-118	C17H18N4O5F4S	466.413		Small-scale ASMS	5.79	387	0	0	0	XTN-B2 All	0	0	0	0	0
	XTN-B2-L-16	O=C1CN(c2c(O)ccc(N3CC(CNC(=O)c4csc(-c5cccnc5)n4)C3)c2F)S(=O)(=O)N1	XTN-B2-092	C21H19N6O5FS2	518.552		Small-scale ASMS	4.36	463	0	0	0	XTN-B2 All	0	0	0	0	0
	XTN-B2-L-8	O=C1CN(c2c(O)ccc(N3CC(CNC(=O)c4nc5ccccc5[nH]4)C3)c2F)S(=O)(=O)N1	XTN-B2-027	C20H19N6O5FS	474.474		Small-scale ASMS	4.52	534	0	0	0	XTN-B2 All	0	0	0	0	0
	XTN-B2-L-15	O=C1CN(c2c(O)ccc(N3CC(CNC(=O)C4(c5cccc(Cl)c5)CC4)C3)c2F)S(=O)(=O)N1	XTN-B2-016	C22H22N4O5ClFS	508.959		Small-scale ASMS	3.69	535	0	0	0	XTN-B2 All	0	0	0	0	0
	XTN-B2-L-12	CC(C)(C)c1cc(C(=O)NCC2CN(c3ccc(O)c(N4CC(=O)NS4(=O)=O)c3F)C2)no1	XTN-B2-061	C20H24N5O6FS	481.506		Small-scale ASMS	4.1	550	0	0	0	XTN-B2 All	0	0	0	0	0
	XTN-B2-L-7	O=C1CN(c2c(O)ccc(N3CC(CNC(=O)c4n[nH]c5cccnc45)C3)c2F)S(=O)(=O)N1	XTN-B2-036	C19H18N7O5FS	475.462		Small-scale ASMS	2.79	899	0	0	0	XTN-B2 All	2.97	138001	0	26167	0
	XTN-B2-L-17	Nc1nonc1C(=O)NCC1CN(c2ccc(O)c(N3CC(=O)NS3(=O)=O)c2F)C1	XTN-B2-099	C15H16N7O6FS	441.401		Small-scale ASMS	2.05	975	0	0	0	XTN-B2 All	0	0	0	0	0
	XTN-B2-L-16	O=C1CN(c2c(O)ccc(N3CC(CNC(=O)c4csc(-c5ccc(F)cc5)n4)C3)c2F)S(=O)(=O)N1	XTN-B2-093	C22H19N5O5F2S2	535.554		Small-scale ASMS	4.63	1168	0	0	0	XTN-B2 All	4.63	4253	0	0	0
	XTN-B2-L-8	O=C1CN(c2c(O)ccc(N3CC(CNC(=O)C4(c5ccncc5)CC4)C3)c2F)S(=O)(=O)N1	XTN-B2-014	C21H22N5O5FS	475.502		Small-scale ASMS	4.87	1251	0	0	0	XTN-B2 All	0	0	0	0	0
	XTN-B2-L-7	CC1(C(=O)NCC2CN(c3ccc(O)c(N4CC(=O)NS4(=O)=O)c3F)C2)CC1	XTN-B2-103	C17H21N4O5FS	412.443		Small-scale ASMS	3.59	4859	0	0	0	XTN-B2 All	3.59	1549	0	162	0
	XTN-B2-L-7	O=C1CN(c2c(O)ccc(N3CC(CNC(=O)c4cc5c(F)cc(F)cc5[nH]4)C3)c2F)S(=O)(=O)N1	XTN-B2-028	C21H18N5O5F3S	509.466		Small-scale ASMS	5.15	9790	0	0	0	XTN-B2 All	5.15	5511	651	584	0
	XTN-B2-L-18	O=C1CN(c2c(O)ccc(N3CC(CNC(=O)c4cc(O)no4)C3)c2F)S(=O)(=O)N1	XTN-B2-119	C16H16N5O7FS	441.397		Small-scale ASMS	2.1	17558	0	0	0	XTN-B2 All	2.1	13799	0	0	0
	XTN-B2-L-8	CC1CC1C(=O)NCC1CN(c2ccc(O)c(N3CC(=O)NS3(=O)=O)c2F)C1	XTN-B2-106	C17H21N4O5FS	412.443		Small-scale ASMS	3.8	18240	0	0	0	XTN-B2 All	0	0	0	0	0
	XTN-B2-L-19	O=C1CN(c2c(O)ccc(N3CC(CNC(=O)C4CC4c4ccc(F)cc4)C3)c2F)S(=O)(=O)N1	XTN-B2-008	C22H22N4O5F2S	492.504		Small-scale ASMS	5.89	62269	4379	4380	0	XTN-B2 All	5.89	17627	0	0	0
	XTN-B2-L-5	CC1(C(=O)NCC2CN(c3ccc(O)c(N4CC(=O)NS4(=O)=O)c3F)C2)CCC1	XTN-B2-002	C18H23N4O5FS	426.47		Small-scale ASMS	7.37	1100661	0	0	0	XTN-B2 All	7.37	2241	111	106	0
	XTN-B2-L-5	N#Cc1ccc2c(C(=O)NCC3CN(c4ccc(O)c(N5CC(=O)NS5(=O)=O)c4F)C3)c[nH]c2c1	XTN-B2-041	C22H19N6O5FS	498.496		Small-scale ASMS	8.34	3650655	886	0	0	XTN-B2 All	8.34	1077	563	424	0
	XTN-B2-L-2	Cc1ccc(C2(C(=O)NCC3CN(c4ccc(O)c(N5CC(=O)NS5(=O)=O)c4F)C3)CC2)cc1	XTN-B2-018	C23H25N4O5FS	488.541		Small-scale ASMS	9.09	13610636	0	0	0	XTN-B2 All	9.09	33406	0	0	0
	XTN-B2-L-16	Cc1nc(C(=O)NCC2CN(c3ccc(O)c(N4CC(=O)NS4(=O)=O)c3F)C2)co1	XTN-B2-091	C17H18N5O6FS	439.425		Small-scale ASMS	2.85	1898	131	126	-0.003	XTN-B2 All	2.85	872	0	110	0
	XTN-B2-L-11	O=C1CN(c2c(O)ccc(N3CC(CNC(=O)c4nc[nH]n4)C3)c2F)S(=O)(=O)N1	XTN-B2-071	C15H16N7O5FS	425.402		Small-scale ASMS	2.85	28281	515	309	-0.007	XTN-B2 All	0	0	0	0	0
	XTN-B2-L-1	Cc1cc(C)n2nc(C(=O)NCC3CN(c4ccc(O)c(N5CC(=O)NS5(=O)=O)c4F)C3)nc2n1	XTN-B2-068	C20H21N8O5FS	504.504		Small-scale ASMS	2.04	11919416	1715053	1619257	-0.008	XTN-B2 All	0	0	0	0	0
	XTN-B2-L-10	Cc1csc(C(=O)NCC2CN(c3ccc(O)c(N4CC(=O)NS4(=O)=O)c3F)C2)n1	XTN-B2-078	C17H18N5O5FS2	455.493		Small-scale ASMS	2.49	1731	138	115	-0.013	XTN-B2 All	2.49	2876	751	200	0
	XTN-B2-L-11	O=C1CN(c2c(O)ccc(N3CC(CNC(=O)C4(O)CCCC4)C3)c2F)S(=O)(=O)N1	XTN-B2-053	C18H23N4O6FS	442.469		Small-scale ASMS	3.66	33869	3929	3480	-0.013	XTN-B2 All	0	0	0	0	0
	XTN-B2-L-18	Cc1nc(C(F)(F)F)c(C(=O)NCC2CN(c3ccc(O)c(N4CC(=O)NS4(=O)=O)c3F)C2)s1	XTN-B2-116	C18H17N5O5F4S2	523.49		Small-scale ASMS	4.74	602	84	74	-0.017	XTN-B2 All	4.74	113	108	0	0
	XTN-B2-L-14	O=C1CN(c2c(O)ccc(N3CC(CNC(=O)C4CCc5ccccc54)C3)c2F)S(=O)(=O)N1	XTN-B2-075	C22H23N4O5FS	474.514		Small-scale ASMS	4.1	52442	1305	0	-0.025	XTN-B2 All	0	0	0	0	0
	XTN-B2-L-10	O=C1CN(c2c(O)ccc(N3CC(CNC(=O)c4cnc[nH]4)C3)c2F)S(=O)(=O)N1	XTN-B2-072	C16H17N6O5FS	424.414		Small-scale ASMS	2.88	45626	3984	2750	-0.027	XTN-B2 All	2.89	28809	0	1919	0
	XTN-B2-L-10	O=C1CN(c2c(O)ccc(N3CC(CNC(=O)c4cc5ncccc5[nH]4)C3)c2F)S(=O)(=O)N1	XTN-B2-030	C20H19N6O5FS	474.474		Small-scale ASMS	3.49	330901	34138	24599	-0.029	XTN-B2 All	3.49	217958	0	21066	0
	XTN-B2-L-10	Cc1ccc2[nH]nc(C(=O)NCC3CN(c4ccc(O)c(N5CC(=O)NS5(=O)=O)c4F)C3)c2c1	XTN-B2-038	C21H21N6O5FS	488.501		Small-scale ASMS	5.52	375201	39564	28798	-0.029	XTN-B2 All	5.52	105485	12716	11838	0
	XTN-B2-L-17	O=C1CN(c2c(O)ccc(N3CC(CNC(=O)c4cnn(-c5ccccc5)c4)C3)c2F)S(=O)(=O)N1	XTN-B2-096	C22H21N6O5FS	500.512		Small-scale ASMS	4.04	1481	133	89	-0.03	XTN-B2 All	4.04	2306	0	381	0
	XTN-B2-L-10	O=C1CN(c2c(O)ccc(N3CC(CNC(=O)[C@@H]4C[C@H]5C=C[C@@H]4C5)C3)c2F)S(=O)(=O)N1	XTN-B2-120	C20H23N4O5FS	450.492		Small-scale ASMS	4.88	113193	11142	7681	-0.031	XTN-B2 All	4.88	3989	629	622	0
	XTN-B2-L-11	Cc1cc(C(=O)NCC2CN(c3ccc(O)c(N4CC(=O)NS4(=O)=O)c3F)C2)on1	XTN-B2-082	C17H18N5O6FS	439.425		Small-scale ASMS	2.75	13262	1942	1523	-0.032	XTN-B2 All	2.75	14703	849	744	0
	XTN-B2-L-10	O=C1CN(c2c(O)ccc(N3CC(CNC(=O)c4cc5cccnc5s4)C3)c2F)S(=O)(=O)N1	XTN-B2-047	C20H18N5O5FS2	491.526		Small-scale ASMS	5.3	299742	29155	19136	-0.033	XTN-B2 All	5.3	174644	18833	18395	0
	XTN-B2-L-17	Cc1nc(C(=O)NCC2CN(c3ccc(O)c(N4CC(=O)NS4(=O)=O)c3F)C2)cs1	XTN-B2-089	C17H18N5O5FS2	455.493		Small-scale ASMS	2.78	612	26	0	-0.042	XTN-B2 All	2.78	10348	751	625	0
	XTN-B2-L-10	CC12CC[C@@](C(=O)NCC3CN(c4ccc(O)c(N5CC(=O)NS5(=O)=O)c4F)C3)(OC1=O)C2(C)C	XTN-B2-117	C22H27N4O7FS	510.544		Small-scale ASMS	5.37	705914	108852	76985	-0.045	XTN-B2 All	5.37	407617	54016	54077	0
	XTN-B2-L-16	Cn1cc(C(=O)NCC2CN(c3ccc(O)c(N4CC(=O)NS4(=O)=O)c3F)C2)c(C(F)(F)F)n1	XTN-B2-094	C18H18N6O5F4S	506.438		Small-scale ASMS	3.49	2227	355	231	-0.056	XTN-B2 All	0	0	0	0	0
	XTN-B2-L-6	O=C1CN(c2c(O)ccc(N3CC(CNC(=O)C4CC4)C3)c2F)S(=O)(=O)N1	XTN-B2-101	C16H19N4O5FS	398.416		Small-scale ASMS	2.66	159	10	0	-0.063	XTN-B2 All	2.66	202	0	0	0
	XTN-B2-L-1	O=C1CN(c2c(O)ccc(N3CC(CNC(=O)C4(c5ccc(F)cc5)CC4)C3)c2F)S(=O)(=O)N1	XTN-B2-019	C22H22N4O5F2S	492.504		Small-scale ASMS	8.63	17145538	1115357	0	-0.065	XTN-B2 All	8.63	2367	0	0	0
	XTN-B2-L-17	O=C1CN(c2c(O)ccc(N3CC(CNC(=O)C4CC5(CCC5)C4)C3)c2F)S(=O)(=O)N1	XTN-B2-114	C20H25N4O5FS	452.508		Small-scale ASMS	4.14	2820	211	0	-0.075	XTN-B2 All	4.14	2580	0	0	0
	XTN-B2-L-3	COc1ccc2[nH]cc(C(=O)NCC3CN(c4ccc(O)c(N5CC(=O)NS5(=O)=O)c4F)C3)c2c1	XTN-B2-045	C22H22N5O6FS	503.512		Small-scale ASMS	8.46	82876040	11292942	8330083	-0.036	XTN-B2 All	8.46	135452	1289	710	-0.004
	XTN-B2-L-2	COc1ccc(C2(C(=O)NCC3CN(c4ccc(O)c(N5CC(=O)NS5(=O)=O)c4F)C3)CC2)cc1	XTN-B2-017	C23H25N4O6FS	504.54		Small-scale ASMS	10.34	7445181	631612	765754	0.018	XTN-B2 All	10.34	549664	9063	3557	-0.01
	XTN-B2-L-1	COc1cc2cc(C(=O)NCC3CN(c4ccc(O)c(N5CC(=O)NS5(=O)=O)c4F)C3)[nH]c2cc1OC	XTN-B2-024	C23H24N5O7FS	533.538		Small-scale ASMS	9.02	33460684	536375	359294	-0.01	XTN-B2 All	9.02	156414	2237	1013	-0.01
	XTN-B2-L-5	Cc1ccc2[nH]c(C(=O)NCC3CN(c4ccc(O)c(N5CC(=O)NS5(=O)=O)c4F)C3)cc2c1	XTN-B2-033	C22H22N5O5FS	487.513		Small-scale ASMS	8.85	11291284	2541898	2192288	-0.03	XTN-B2 All	8.85	114247	15745	14698	-0.01
	XTN-B2-L-3	O=C1CN(c2c(O)ccc(N3CC(CNC(=O)c4cc(-c5ccc(F)cc5)[nH]n4)C3)c2F)S(=O)(=O)N1	XTN-B2-074	C22H20N6O5F2S	518.502		Small-scale ASMS	2.13	19607214	2119118	1415466	-0.036	XTN-B2 All	2.13	4740	1416	1339	-0.016
	Core C3
	OID	smiles	VENDOR_ID	Molecular Formula	MOLECULE_WEIGHT	PTPN2 IC50	Small-scale ASMS	Observed RT (min)	Intensity_ (no treatment)	Intensity (Ultrafiltration)	Intensity (Ultrafiltration after incubation with protein)	efficiency (Small-scale ASMS)	Large-scale ASMS	Observed RT (min) 2	Intensity_ (no treatment) 2	Intensity (Ultrafiltration) 2	Intensity (Ultrafiltration after incubation with protein) 2	efficiency (Large-scale ASMS)
	XTN-C3-L-2	Cc1ccc2[nH]c(C(=O)N3CCC4(C3)CN(c3ccc(O)c(N5CC(=O)NS5(=O)=O)c3F)C4)cc2c1	XTN-C3-033	C24H24N5O5FS	513.551		Small-scale ASMS	6.17	180939	11514	10745	-0.004	XTN-C3 All	6.17	214072	21396	25034	0.017
	XTN-C3-L-2	O=C1CN(c2c(O)ccc(N3CC4(CCN(C(=O)c5c[nH]c6cccnc56)C4)C3)c2F)S(=O)(=O)N1	XTN-C3-042	C22H21N6O5FS	500.512		Small-scale ASMS	3.84	91087	7938	6447	-0.016	XTN-C3 All	3.84	68645	6685	7676	0.014
	XTN-C3-L-2	O=C1CN(c2c(O)ccc(N3CC4(CCN(C(=O)c5cc6cccnc6s5)C4)C3)c2F)S(=O)(=O)N1	XTN-C3-047	C22H20N5O5FS2	517.564		Small-scale ASMS	6.13	2785	255	206	-0.018	XTN-C3 All	0	0	0	0	0
	XTN-C3-L-2	O=C1CN(c2c(O)ccc(N3CC4(CCN(C(=O)c5nc[nH]n5)C4)C3)c2F)S(=O)(=O)N1	XTN-C3-071	C17H18N7O5FS	451.44		Small-scale ASMS	4.01	10742	1249	1133	-0.011	XTN-C3 All	4.01	3350	204	231	0.008
	XTN-C3-L-3	Cc1cccc2[nH]c(C(=O)N3CCC4(C3)CN(c3ccc(O)c(N5CC(=O)NS5(=O)=O)c3F)C4)nc12	XTN-C3-031	C23H23N6O5FS	514.539		Small-scale ASMS	7.45	374	0	0	0	XTN-C3 All	0	0	0	0	0
	XTN-C3-L-3	O=C1CN(c2c(O)ccc(N3CC4(CCN(C(=O)C5(O)CCCC5)C4)C3)c2F)S(=O)(=O)N1	XTN-C3-053	C20H25N4O6FS	468.507		Small-scale ASMS	3.88	153496	0	0	0	XTN-C3 All	3.88	50182	4253	4971	0.0143
	XTN-C3-L-3	O=C1CN(c2c(O)ccc(N3CC4(CCN(C(=O)c5cnc[nH]5)C4)C3)c2F)S(=O)(=O)N1	XTN-C3-072	C18H19N6O5FS	450.452		Small-scale ASMS	3.28	34637	3040	2532	-0.015	XTN-C3 All	3.28	8860	439	446	0.001
	XTN-C3-L-3	Nc1c(C(=O)N2CCC3(C2)CN(c2ccc(O)c(N4CC(=O)NS4(=O)=O)c2F)C3)sc2ncccc12	XTN-C3-097	C22H21N6O5FS2	532.579		Small-scale ASMS	6.08	21412	1388	1243	-0.007	XTN-C3 All	6.08	10979	0	0	0
	XTN-C3-L-3	O=C1CN(c2c(O)ccc(N3CC4(CCN(C(=O)C5(F)CC5)C4)C3)c2F)S(=O)(=O)N1	XTN-C3-102	C18H20N4O5F2S	442.444		Small-scale ASMS	5.51	105	0	0	0	XTN-C3 All	0	0	0	0	0
	XTN-C3-L-7	O=C1CN(c2c(O)ccc(N3CC4(CCN(C(=O)C5(O)CCC5)C4)C3)c2F)S(=O)(=O)N1	XTN-C3-001	C19H23N4O6FS	454.48		Small-scale ASMS	4.52	218349	26753	22983	-0.017	XTN-C3 All	4.52	49828	5013	5610	0.012
	XTN-C3-L-7	CC(=O)N1CCC[C@@H]1C(=O)N1CCC2(C1)CN(c1ccc(O)c(N3CC(=O)NS3(=O)=O)c1F)C2	XTN-C3-003	C21H26N5O6FS	495.533		Small-scale ASMS	4.32	201902	21701	16837	-0.024	XTN-C3 All	4.32	48672	3985	4462	0.01
	XTN-C3-L-7	CC(=O)N1C[C@H](O)C[C@H]1C(=O)N1CCC2(C1)CN(c1ccc(O)c(N3CC(=O)NS3(=O)=O)c1F)C2	XTN-C3-004	C21H26N5O7FS	511.532		Small-scale ASMS	3.55	54612	4718	4097	-0.011	XTN-C3 All	3.55	14320	756	924	0.012
	XTN-C3-L-7	COC(=O)C12CCC(C(=O)N3CCC4(C3)CN(c3ccc(O)c(N5CC(=O)NS5(=O)=O)c3F)C4)(CC1)C2	XTN-C3-012	C24H29N4O7FS	536.582		Small-scale ASMS	6.05	274040	37239	24078	-0.048	XTN-C3 All	6.05	95556	11870	12905	0.011
	XTN-C3-L-7	O=C1CN(c2c(O)ccc(N3CC4(CCN(C(=O)C5(c6ccc7c(c6)OC(F)(F)O7)CC5)C4)C3)c2F)S(=O)(=O)N1	XTN-C3-013	C25H23N4O7F3S	580.541		Small-scale ASMS	7.28	116749	7575	7020	-0.005	XTN-C3 All	7.28	32809	2334	2966	0.019
	XTN-C3-L-7	O=C1CN(c2c(O)ccc(N3CC4(CCN(C(=O)C5(c6ccncc6)CC5)C4)C3)c2F)S(=O)(=O)N1	XTN-C3-014	C23H24N5O5FS	501.54		Small-scale ASMS	3.74	493703	59975	48433	-0.023	XTN-C3 All	3.74	125306	13978	15858	0.015
	XTN-C3-L-7	O=C1CN(c2c(O)ccc(N3CC4(CCN(C(=O)C5(c6cccc(Cl)c6)CC5)C4)C3)c2F)S(=O)(=O)N1	XTN-C3-016	C24H24N4O5ClFS	534.997		Small-scale ASMS	6.91	252558	19103	17298	-0.007	XTN-C3 All	6.91	30544	4135	4662	0.017
	XTN-C3-L-8	O=C1CN(c2c(O)ccc(N3CC4(CCN(C(=O)C5CC(O)C5)C4)C3)c2F)S(=O)(=O)N1	XTN-C3-006	C19H23N4O6FS	454.48		Small-scale ASMS	4.53	218349	26753	22983	-0.017	XTN-C3 All	4.53	49828	5013	5610	0.012
	XTN-C3-L-8	O=C1CN(c2c(O)ccc(N3CC4(CCN(C(=O)C5(c6ccccn6)CC5)C4)C3)c2F)S(=O)(=O)N1	XTN-C3-015	C23H24N5O5FS	501.54		Small-scale ASMS	4.69	267548	28118	21848	-0.023	XTN-C3 All	4.69	70093	8245	9499	0.018
	XTN-C3-L-1	OC1=CC=C(N2CC3(CN(C(C4(CC4)C5=CC=C(OC)C=C5)=O)CC3)C2)C(F)=C1N6CC(NS6(=O)=O)=O<NL>COc1ccc(C2(C(=O)N3CCC4(C3)CN(c3ccc(O)c(N5CC(=O)NS5(=O)=O)c3F)C4)CC2)cc1	XTN-C3-017	C25H27N4O6FS	530.575	130.9	Small-scale ASMS	6.24	409743	22036	58369	0.089	XTN-C3 All	6.24	206899	23029	26183	0.015
	XTN-C3-L-8	O=C1CN(c2c(O)ccc(N3CC4(CCN(C(=O)c5cc6cc(F)c(F)cc6[nH]5)C4)C3)c2F)S(=O)(=O)N1	XTN-C3-026	C23H20N5O5F3S	535.504	113.1	Small-scale ASMS	7.19	158416	11014	16573	0.035	XTN-C3 All	7.19	57351	4233	9329	0.089
	XTN-C3-L-8	O=C1CN(c2c(O)ccc(N3CC4(CCN(C(=O)C5(c6ccccc6)CCCC5)C4)C3)c2F)S(=O)(=O)N1	XTN-C3-021	C26H29N4O5FS	528.606		Small-scale ASMS	7.25	427246	35415	34267	-0.003	XTN-C3 All	7.25	123038	11366	13950	0.021
	XTN-C3-L-8	O=C1CN(c2c(O)ccc(N3CC4(CCN(C(=O)c5cc6ccccc6[nH]5)C4)C3)c2F)S(=O)(=O)N1	XTN-C3-022	C23H22N5O5FS	499.524		Small-scale ASMS	6.63	101570	6502	6365	-0.001	XTN-C3 All	6.63	19918	1870	2501	0.032
	XTN-C3-L-8	Cc1ccc2cc(C(=O)N3CCC4(C3)CN(c3ccc(O)c(N5CC(=O)NS5(=O)=O)c3F)C4)[nH]c2c1	XTN-C3-023	C24H24N5O5FS	513.551		Small-scale ASMS	6.18	189039	11514	10745	-0.004	XTN-C3 All	6.18	214072	21396	25034	0.017
	XTN-C3-L-5	O=C1CN(c2c(O)ccc(N3CC4(CCN(C(=O)c5cc6ccccc6s5)C4)C3)c2F)S(=O)(=O)N1	XTN-C3-048	C23H21N4O5FS2	516.576	122.3	Small-scale ASMS	6.62	661973	71807	99820	0.042	XTN-C3 All	6.62	41934	4673	5589	0.022
	XTN-C3-L-5	Cc1nn(C)c(C)c1C(=O)N1CCC2(C1)CN(c1ccc(O)c(N3CC(=O)NS3(=O)=O)c1F)C2	XTN-C3-055	C21H25N6O5FS	492.533		Small-scale ASMS	4.7	455745	51687	61046	0.021	XTN-C3 All	4.7	121981	13773	14955	0.01
	XTN-C3-L-5	Cc1nc(C(=O)N2CCC3(C2)CN(c2ccc(O)c(N4CC(=O)NS4(=O)=O)c2F)C3)cs1	XTN-C3-089	C19H20N5O5FS2	481.531		Small-scale ASMS	5.06	544854	53236	55791	0.005	XTN-C3 All	5.06	303720	35213	40354	0.017
	XTN-C3-L-5	Cc1nc(C(=O)N2CCC3(C2)CN(c2ccc(O)c(N4CC(=O)NS4(=O)=O)c2F)C3)co1	XTN-C3-091	C19H20N5O6FS	465.463	108.6	Small-scale ASMS	4.77	446006	51489	61280	0.022	XTN-C3 All	4.77	90229	11127	12428	0.014
	XTN-C3-L-5	O=C1CN(c2c(O)ccc(N3CC4(CCN(C(=O)c5csc(-c6ccc(F)cc6)n5)C4)C3)c2F)S(=O)(=O)N1	XTN-C3-093	C24H21N5O5F2S2	561.592		Small-scale ASMS	6.9	717622	58987	89834	0.043	XTN-C3 All	0	0	0	0	0
	XTN-C3-L-5	Cn1cc(C(=O)N2CCC3(C2)CN(c2ccc(O)c(N4CC(=O)NS4(=O)=O)c2F)C3)c(C(F)(F)F)n1	XTN-C3-094	C20H20N6O5F4S	532.476		Small-scale ASMS	5.39	706251	90612	106923	0.023	XTN-C3 All	5.39	144161	20638	22443	0.013
	XTN-C3-L-5	O=C1CN(c2c(O)ccc(N3CC4(CCN(C(=O)c5cnn(-c6ccccc6)c5)C4)C3)c2F)S(=O)(=O)N1	XTN-C3-096	C24H23N6O5FS	526.55	79.42	Small-scale ASMS	6.28	797397	77030	97176	0.025	XTN-C3 All	6.28	183041	21442	25263	0.021
	XTN-C3-L-12	CC1CC(C(=O)N2CCC3(C2)CN(c2ccc(O)c(N4CC(=O)NS4(=O)=O)c2F)C3)C1	XTN-C3-005	C20H25N4O5FS	452.508		Small-scale ASMS	5.78	1597701	187666	224218	0.023	XTN-C3 All	5.78	288430	31200	32799	0.006
	XTN-C3-L-12	O=C1CN(c2c(O)ccc(N3CC4(CCN(C(=O)C5CC5c5ccc(F)cc5)C4)C3)c2F)S(=O)(=O)N1	XTN-C3-008	C24H24N4O5F2S	518.542	102.3	Small-scale ASMS	6.59	1688065	189969	228421	0.023	XTN-C3 All	6.59	274291	34130	39764	0.021
	XTN-C3-L-12	CN1CCC(C(=O)N2CCC3(C2)CN(c2ccc(O)c(N4CC(=O)NS4(=O)=O)c2F)C3)C1=O	XTN-C3-011	C20H24N5O6FS	481.506		Small-scale ASMS	4.05	88048	5362	4077	-0.015	XTN-C3 All	4.05	54664	5424	6303	0.016
	XTN-C3-L-12	O=C1CN(c2c(O)ccc(N3CC4(CCN(C(=O)c5c[nH]c6ccccc56)C4)C3)c2F)S(=O)(=O)N1	XTN-C3-040	C23H22N5O5FS	499.524	31.3	Small-scale ASMS	5.47	609911	65188	88324	0.038	XTN-C3 All	5.47	133755	15366	18448	0.023
	XTN-C3-L-12	N#Cc1ccc2c(C(=O)N3CCC4(C3)CN(c3ccc(O)c(N5CC(=O)NS5(=O)=O)c3F)C4)c[nH]c2c1	XTN-C3-041	C24H21N6O5FS	524.534	59.53	Small-scale ASMS	5.71	375478	33065	49707	0.044	XTN-C3 All	5.71	80065	7916	9387	0.018
	XTN-C3-L-12	Cc1ccc2[nH]cc(C(=O)N3CCC4(C3)CN(c3ccc(O)c(N5CC(=O)NS5(=O)=O)c3F)C4)c2c1	XTN-C3-043	C24H24N5O5FS	513.551	32.43	Small-scale ASMS	5.87	820454	88721	117065	0.035	XTN-C3 All	5.87	150896	22954	27221	0.028
	XTN-C3-L-12	COc1ccc2c(C(=O)N3CCC4(C3)CN(c3ccc(O)c(N5CC(=O)NS5(=O)=O)c3F)C4)c[nH]c2c1	XTN-C3-044	C24H24N5O6FS	529.55	15.72	Small-scale ASMS	5.55	198460	19130	25761	0.033	XTN-C3 All	5.55	194907	20093	24445	0.022
	XTN-C3-L-14	O=C1CN(c2c(O)ccc(N3CC4(CCN(C(=O)c5cnoc5)C4)C3)c2F)S(=O)(=O)N1	XTN-C3-060	C18H18N5O6FS	451.436		Small-scale ASMS	4.69	127355	1979	8204	0.049	XTN-C3 All	4.69	19618	464	1536	0.055
	XTN-C3-L-14	CC(C)(C)c1cc(C(=O)N2CCC3(C2)CN(c2ccc(O)c(N4CC(=O)NS4(=O)=O)c2F)C3)no1	XTN-C3-061	C22H26N5O6FS	507.544		Small-scale ASMS	6.66	2406813	253490	320717	0.028	XTN-C3 All	6.66	1446	153	163	0.007
	XTN-C3-L-14	O=C1CN(c2c(O)ccc(N3CC4(CCN(C(=O)c5cnn6cccnc56)C4)C3)c2F)S(=O)(=O)N1	XTN-C3-063	C21H20N7O5FS	501.5		Small-scale ASMS	4.59	599533	66851	79964	0.022	XTN-C3 All	4.59	167174	15494	17730	0.013
	XTN-C3-L-14	O=C1CN(c2c(O)ccc(N3CC4(CCN(C(=O)c5cnn(Cc6ccccc6)c5)C4)C3)c2F)S(=O)(=O)N1	XTN-C3-064	C25H25N6O5FS	540.577		Small-scale ASMS	6.01	665397	96660	130309	0.051	XTN-C3 All	6.01	379397	0	0	0
	XTN-C3-L-14	O=C1CN(c2c(O)ccc(N3CC4(CCN(C(=O)c5cnn6ccccc56)C4)C3)c2F)S(=O)(=O)N1	XTN-C3-065	C22H21N6O5FS	500.512	141.5	Small-scale ASMS	5.32	973297	111940	131028	0.02	XTN-C3 All	5.32	196701	26377	29252	0.015
	XTN-C3-L-14	Cn1cnc(C(=O)N2CCC3(C2)CN(c2ccc(O)c(N4CC(=O)NS4(=O)=O)c2F)C3)c1	XTN-C3-067	C19H21N6O5FS	464.479		Small-scale ASMS	3.39	225240	21480	25718	0.019	XTN-C3 All	3.39	60395	4743	5096	0.006
	XTN-C3-L-14	Cc1cc(C)n2nc(C(=O)N3CCC4(C3)CN(c3ccc(O)c(N5CC(=O)NS5(=O)=O)c3F)C4)nc2n1	XTN-C3-068	C22H23N8O5FS	530.542		Small-scale ASMS	4.89	520876	52017	62284	0.02	XTN-C3 All	4.89	121010	9816	11197	0.011
	XTN-C3-L-11	O=C1CN(c2c(O)ccc(N3CC4(CCN(C(=O)C5(c6ccccc6F)CCCC5)C4)C3)c2F)S(=O)(=O)N1	XTN-C3-020	C26H28N4O5F2S	546.596		Small-scale ASMS	6.8	5025	681	598	-0.017	XTN-C3 All	6.8	26325	0	0	0
	XTN-C3-L-11	Cc1cccc2cc(C(=O)N3CCC4(C3)CN(c3ccc(O)c(N5CC(=O)NS5(=O)=O)c3F)C4)[nH]c12	XTN-C3-025	C24H24N5O5FS	513.551		Small-scale ASMS	6.4	1275	139	151	0.009	XTN-C3 All	6.4	617	107	126	0.031
	XTN-C3-L-11	O=C1CN(c2c(O)ccc(N3CC4(CCN(C(=O)c5cc6cc(F)cc(F)c6[nH]5)C4)C3)c2F)S(=O)(=O)N1	XTN-C3-032	C23H20N5O5F3S	535.504		Small-scale ASMS	6.66	43715	1827	2602	0.018	XTN-C3 All	6.66	7553	0	0	0
	XTN-C3-L-11	COc1ccc2[nH]c(C(=O)N3CCC4(C3)CN(c3ccc(O)c(N5CC(=O)NS5(=O)=O)c3F)C4)cc2c1	XTN-C3-034	C24H24N5O6FS	529.55	165.1	Small-scale ASMS	6.32	259276	21549	29072	0.029	XTN-C3 All	6.32	57140	6001	8239	0.039
	XTN-C3-L-11	O=C1CN(c2c(O)ccc(N3CC4(CCN(C(=O)c5c[nH]c6ccncc56)C4)C3)c2F)S(=O)(=O)N1	XTN-C3-037	C22H21N6O5FS	500.512	51.26	Small-scale ASMS	3.7	195361	15737	18517	0.014	XTN-C3 All	3.7	44290	5270	6360	0.025
	XTN-C3-L-11	O=C1CN(c2c(O)ccc(N3CC4(CCN(C(=O)c5csc6ccccc56)C4)C3)c2F)S(=O)(=O)N1	XTN-C3-039	C23H21N4O5FS2	516.576	83.38	Small-scale ASMS	6.35	180303	15377	17948	0.014	XTN-C3 All	6.35	56248	4673	5589	0.016
	XTN-C3-L-15	O=C1CN(c2c(O)ccc(N3CC4(CCN(C(=O)c5cc6sccc6[nH]5)C4)C3)c2F)S(=O)(=O)N1	XTN-C3-073	C21H20N5O5FS2	505.553	175.7	Small-scale ASMS	6.17	934164	92533	114624	0.024	XTN-C3 All	6.17	228284	26958	34658	0.034
	XTN-C3-L-15	O=C1CN(c2c(O)ccc(N3CC4(CCN(C(=O)c5cc(-c6ccc(F)cc6)[nH]n5)C4)C3)c2F)S(=O)(=O)N1	XTN-C3-074	C24H22N6O5F2S	544.54		Small-scale ASMS	6.39	1511618	141475	183205	0.028	XTN-C3 All	6.39	1525	156	204	0.031
	XTN-C3-L-15	O=C1CN(c2c(O)ccc(N3CC4(CCN(C(=O)C5CC(=O)N(Cc6ccccc6)C5)C4)C3)c2F)S(=O)(=O)N1	XTN-C3-077	C26H28N5O6FS	557.604		Small-scale ASMS	5.59	982109	113913	123169	0.009	XTN-C3 All	5.59	277769	32791	35045	0.008
	XTN-C3-L-15	O=C1CN(c2c(O)ccc(N3CC4(CCN(C(=O)c5cnco5)C4)C3)c2F)S(=O)(=O)N1	XTN-C3-079	C18H18N5O6FS	451.436		Small-scale ASMS	4.48	309521	43242	44640	0.005	XTN-C3 All	4.48	77288	9018	10187	0.015
	XTN-C3-L-15	Cc1ncsc1C(=O)N1CCC2(C1)CN(c1ccc(O)c(N3CC(=O)NS3(=O)=O)c1F)C2	XTN-C3-081	C19H20N5O5FS2	481.531		Small-scale ASMS	4.86	783758	93679	95071	0.002	XTN-C3 All	4.86	303720	35213	40354	0.017
	XTN-C3-L-15	Cc1cc(C(=O)N2CCC3(C2)CN(c2ccc(O)c(N4CC(=O)NS4(=O)=O)c2F)C3)on1	XTN-C3-082	C19H20N5O6FS	465.463		Small-scale ASMS	5.1	437033	51711	54003	0.005	XTN-C3 All	5.1	41287	1385	1534	0.004
	XTN-C3-L-15	O=C1CN(c2c(O)ccc(N3CC4(CCN(C(=O)c5cncs5)C4)C3)c2F)S(=O)(=O)N1	XTN-C3-083	C18H18N5O5FS2	467.504		Small-scale ASMS	4.78	666753	79700	83808	0.006	XTN-C3 All	4.78	140778	17900	21138	0.023
	XTN-C3-L-17	CC1CC1C(=O)N1CCC2(C1)CN(c1ccc(O)c(N3CC(=O)NS3(=O)=O)c1F)C2	XTN-C3-106	C19H23N4O5FS	438.481		Small-scale ASMS	5.3	1015883	134363	134353	0	XTN-C3 All	5.3	21769	1951	2178	0.01
	XTN-C3-L-17	O=C1CN(c2c(O)ccc(N3CC4(CCN(C(=O)c5cc6c(s5)CCCC6)C4)C3)c2F)S(=O)(=O)N1	XTN-C3-110	C23H25N4O5FS2	520.608		Small-scale ASMS	6.81	1984383	186030	239660	0.027	XTN-C3 All	0	0	0	0	0
	XTN-C3-L-17	O=C1CN(c2c(O)ccc(N3CC4(CCN(C(=O)c5cc6cc(C(F)(F)F)ccc6[nH]5)C4)C3)c2F)S(=O)(=O)N1	XTN-C3-112	C24H21N5O5F4S	567.521		Small-scale ASMS	7.1	1306566	86342	236947	0.115	XTN-C3 All	7.1	43722	0	278	0.006
	XTN-C3-L-17	O=C1CN(c2c(O)ccc(N3CC4(CCN(C(=O)c5cnc(C(F)(F)F)s5)C4)C3)c2F)S(=O)(=O)N1	XTN-C3-113	C19H17N5O5F4S2	535.501		Small-scale ASMS	6.36	683114	85385	84647	-0.001	XTN-C3 All	6.36	163316	0	0	0
	XTN-C3-L-17	O=C1CN(c2c(O)ccc(N3CC4(CCN(C(=O)C5CC(c6ccccc6)C5)C4)C3)c2F)S(=O)(=O)N1	XTN-C3-115	C25H27N4O5FS	514.579	36.92	Small-scale ASMS	6.69	999407	100433	154286	0.054	XTN-C3 All	6.69	489641	59861	69925	0.021
	XTN-C3-L-17	CC1(C)[C@]2(C)CC[C@]1(C(=O)N1CCC3(C1)CN(c1ccc(O)c(N4CC(=O)NS4(=O)=O)c1F)C3)OC2=O	XTN-C3-117	C24H29N4O7FS	536.582		Small-scale ASMS	6.03	266013	24687	24529	-0.001	XTN-C3 All	6.03	99556	11870	12905	0.01
	XTN-C3-L-17	O=C1CN(c2c(O)ccc(N3CC4(CCN(C(=O)c5cc(O)no5)C4)C3)c2F)S(=O)(=O)N1	XTN-C3-119	C18H18N5O7FS	467.435		Small-scale ASMS	4.48	157761	21388	21666	0.002	XTN-C3 All	4.48	38010	3707	4764	0.028
	XTN-C3-L-1	O=C1CN(c2c(O)ccc(N3CC4(CCN(C(=O)c5cc6ncccc6[nH]5)C4)C3)c2F)S(=O)(=O)N1	XTN-C3-030	C22H21N6O5FS	500.512		Small-scale ASMS	3.83	183441	8720	19899	0.061	XTN-C3 All	3.83	68645	6685	7676	0.014
	XTN-C3-L-1	Cc1ccc2[nH]nc(C(=O)N3CCC4(C3)CN(c3ccc(O)c(N5CC(=O)NS5(=O)=O)c3F)C4)c2c1	XTN-C3-038	C23H23N6O5FS	514.539		Small-scale ASMS	5.94	254543	8932	16444	0.03	XTN-C3 All	5.94	109968	6067	6879	0.007
	XTN-C3-L-1	Cc1ccc2c(C(=O)N3CCC4(C3)CN(c3ccc(O)c(N5CC(=O)NS5(=O)=O)c3F)C4)c[nH]c2c1	XTN-C3-046	C24H24N5O5FS	513.551		Small-scale ASMS	5.91	124430	0	16643	0.134	XTN-C3 All	5.91	150986	22954	27221	0.028
	XTN-C3-L-1	O=C1CN(c2c(O)ccc(N3CC4(CCN(C(=O)C5C[C@H]6C=C[C@@H]5C6)C4)C3)c2F)S(=O)(=O)N1	XTN-C3-120	C22H25N4O5FS	476.53		Small-scale ASMS	5.83	164836	7070	17430	0.063	XTN-C3 All	5.83	26632	0	0	0
	XTN-C3-L-6	O=C1CN(c2c(O)ccc(N3CC4(CCN(C(=O)c5cnn6c5CCC6)C4)C3)c2F)S(=O)(=O)N1	XTN-C3-009	C21H23N6O5FS	490.517		Small-scale ASMS	4.9	608360	51533	76217	0.041	XTN-C3 All	4.9	1157	119	128	0.008
	XTN-C3-L-6	Cc1nc(C(=O)N2CCC3(C2)CN(c2ccc(O)c(N4CC(=O)NS4(=O)=O)c2F)C3)c(C)o1	XTN-C3-090	C20H22N5O6FS	479.49		Small-scale ASMS	5.12	660548	79598	95100	0.023	XTN-C3 All	5.12	193528	23061	25022	0.01
	XTN-C3-L-6	Nc1c(C(=O)N2CCC3(C2)CN(c2ccc(O)c(N4CC(=O)NS4(=O)=O)c2F)C3)cnn1-c1ccc(F)cc1	XTN-C3-095	C24H23N7O5F2S	559.555		Small-scale ASMS	5.85	781547	49232	82905	0.043	XTN-C3 All	5.85	138700	6167	6638	0.003
	XTN-C3-L-6	NC(=O)C1(C(=O)N2CCC3(C2)CN(c2ccc(O)c(N4CC(=O)NS4(=O)=O)c2F)C3)CC1	XTN-C3-104	C19H22N5O6FS	467.479		Small-scale ASMS	3.83	223720	17275	28415	0.05	XTN-C3 All	3.83	43780	4658	5133	0.011
	XTN-C3-L-6	Cn1nc(C(=O)N2CCC3(C2)CN(c2ccc(O)c(N4CC(=O)NS4(=O)=O)c2F)C3)c2cccnc21	XTN-C3-108	C22H22N7O5FS	515.527		Small-scale ASMS	5.76	815161	56938	88894	0.039	XTN-C3 All	5.76	202009	22371	23350	0.005
	XTN-C3-L-6	O=C1CN(c2c(O)ccc(N3CC4(CCN(C(=O)c5cc6cc(C(F)(F)F)cnc6[nH]5)C4)C3)c2F)S(=O)(=O)N1	XTN-C3-111	C23H20N6O5F4S	568.509		Small-scale ASMS	6.82	808663	37898	81981	0.055	XTN-C3 All	0	0	0	0	0
	XTN-C3-L-6	Cc1nc(C(F)(F)F)c(C(=O)N2CCC3(C2)CN(c2ccc(O)c(N4CC(=O)NS4(=O)=O)c2F)C3)s1	XTN-C3-116	C20H19N5O5F4S2	549.528		Small-scale ASMS	5.84	730076	63025	98170	0.048	XTN-C3 All	5.84	105214	0	0	0
	XTN-C3-L-13	COc1ccc2[nH]cc(C(=O)N3CCC4(C3)CN(c3ccc(O)c(N5CC(=O)NS5(=O)=O)c3F)C4)c2c1	XTN-C3-045	C24H24N5O6FS	529.55	49.85	Small-scale ASMS	5.5	604417	37432	70616	0.055	XTN-C3 All	5.5	194907	20093	24445	0.022
	XTN-C3-L-13	Cc1ncc(C(=O)N2CCC3(C2)CN(c2ccc(O)c(N4CC(=O)NS4(=O)=O)c2F)C3)s1	XTN-C3-050	C19H20N5O5FS2	481.531	128.2	Small-scale ASMS	5.12	791265	74195	98323	0.03	XTN-C3 All	5.12	232326	14823	26449	0.05
	XTN-C3-L-13	Nc1ncc(C(=O)N2CCC3(C2)CN(c2ccc(O)c(N4CC(=O)NS4(=O)=O)c2F)C3)s1	XTN-C3-051	C18H19N6O5FS2	482.519		Small-scale ASMS	3.88	218536	12870	24814	0.055	XTN-C3 All	3.88	50182	4253	4971	0.014
	XTN-C3-L-13	O=C1CN(c2c(O)ccc(N3CC4(CCN(C(=O)C5CCCC5)C4)C3)c2F)S(=O)(=O)N1	XTN-C3-052	C20H25N4O5FS	452.508	16.76	Small-scale ASMS	5.65	1101484	117587	144659	0.025	XTN-C3 All	5.65	49379	5014	5574	0.011
	XTN-C3-L-13	Cc1nc(O)sc1C(=O)N1CCC2(C1)CN(c1ccc(O)c(N3CC(=O)NS3(=O)=O)c1F)C2	XTN-C3-054	C19H20N5O6FS2	497.53		Small-scale ASMS	4.54	331851	26440	44220	0.054	XTN-C3 All	4.54	57165	7280	8004	0.013
	XTN-C3-L-13	Cc1oncc1C(=O)N1CCC2(C1)CN(c1ccc(O)c(N3CC(=O)NS3(=O)=O)c1F)C2	XTN-C3-057	C19H20N5O6FS	465.463		Small-scale ASMS	4.89	243458	17162	33397	0.067	XTN-C3 All	4.89	90229	11127	12428	0.014
	XTN-C3-L-13	Cc1cc(C(=O)N2CCC3(C2)CN(c2ccc(O)c(N4CC(=O)NS4(=O)=O)c2F)C3)n[nH]1	XTN-C3-059	C19H21N6O5FS	464.479	236.6	Small-scale ASMS	4.69	712355	66423	85597	0.027	XTN-C3 All	4.69	271788	31020	34611	0.013
	XTN-C3-L-4	O=C1CN(c2c(O)ccc(N3CC4(CCN(C(=O)C5(c6ccc(F)cc6)CC5)C4)C3)c2F)S(=O)(=O)N1	XTN-C3-019	C24H24N4O5F2S	518.542		Small-scale ASMS	6.34	361361	52265	64666	0.034	XTN-C3 All	6.34	2286	179	276	0.042
	XTN-C3-L-4	COc1cc2cc(C(=O)N3CCC4(C3)CN(c3ccc(O)c(N5CC(=O)NS5(=O)=O)c3F)C4)[nH]c2cc1OC	XTN-C3-024	C25H26N5O7FS	559.576		Small-scale ASMS	5.94	254254	30321	41620	0.044	XTN-C3 All	5.94	207572	22608	26569	0.019
	XTN-C3-L-4	Cn1cc(C(=O)N2CCC3(C2)CN(c2ccc(O)c(N4CC(=O)NS4(=O)=O)c2F)C3)cn1	XTN-C3-062	C19H21N6O5FS	464.479	148.8	Small-scale ASMS	4.67	134348	20102	24042	0.029	XTN-C3 All	4.67	271788	31020	34611	0.013
	XTN-C3-L-4	O=C1CN(c2c(O)ccc(N3CC4(CCN(C(=O)c5c[nH]nn5)C4)C3)c2F)S(=O)(=O)N1	XTN-C3-070	C17H18N7O5FS	451.44		Small-scale ASMS	4.12	58533	8364	10624	0.039	XTN-C3 All	4.12	54344	5650	6444	0.015
	XTN-C3-L-4	Cc1scnc1C(=O)N1CCC2(C1)CN(c1ccc(O)c(N3CC(=O)NS3(=O)=O)c1F)C2	XTN-C3-088	C19H20N5O5FS2	481.531		Small-scale ASMS	4.85	132605	16494	21773	0.04	XTN-C3 All	4.85	303720	35213	40354	0.017
	XTN-C3-L-4	O=C1CN(c2c(O)ccc(N3CC4(CCN(C(=O)c5csc(-c6cccnc6)n5)C4)C3)c2F)S(=O)(=O)N1	XTN-C3-092	C23H21N6O5FS2	544.59		Small-scale ASMS	5.31	101993	8850	12200	0.033	XTN-C3 All	5.31	105459	0	0	0
	XTN-C3-L-4	Cn1cc(C(=O)N2CCC3(C2)CN(c2ccc(O)c(N4CC(=O)NS4(=O)=O)c2F)C3)c2ccccc21	XTN-C3-109	C24H24N5O5FS	513.551	103.9	Small-scale ASMS	6.05	234306	29958	39023	0.039	XTN-C3 All	6.05	150896	22954	27221	0.028
	XTN-C3-L-9	Cc1ccc(C2(C(=O)N3CCC4(C3)CN(c3ccc(O)c(N5CC(=O)NS5(=O)=O)c3F)C4)CC2)cc1	XTN-C3-018	C25H27N4O5FS	514.579		Small-scale ASMS	6.53	561481	80471	99100	0.033	XTN-C3 All	6.53	489641	0	0	0
	XTN-C3-L-9	O=C1CN(c2c(O)ccc(N3CC4(CCN(C(=O)C5CCc6ccccc65)C4)C3)c2F)S(=O)(=O)N1	XTN-C3-075	C24H25N4O5FS	500.552	26.72	Small-scale ASMS	6.26	302125	41665	53639	0.04	XTN-C3 All	6.26	222475	0	31680	0.142
	XTN-C3-L-9	Nc1nonc1C(=O)N1CCC2(C1)CN(c1ccc(O)c(N3CC(=O)NS3(=O)=O)c1F)C2	XTN-C3-099	C17H18N7O6FS	467.439		Small-scale ASMS	5.3	81081	9131	12892	0.046	XTN-C3 All	5.3	56059	6649	7584	0.017
	XTN-C3-L-9	Nc1sc2c(c1C(=O)N1CCC3(C1)CN(c1ccc(O)c(N4CC(=O)NS4(=O)=O)c1F)C3)CCCC2	XTN-C3-100	C23H26N5O5FS2	535.623		Small-scale ASMS	6.48	120485	110	168	0.000481388	XTN-C3 All	6.48	40275	0	0	0
	XTN-C3-L-9	Cn1cc(C(=O)N2CCC3(C2)CN(c2ccc(O)c(N4CC(=O)NS4(=O)=O)c2F)C3)c2cccnc21	XTN-C3-107	C23H23N6O5FS	514.539		Small-scale ASMS	5.33	254735	34639	43030	0.033	XTN-C3 All	5.33	268173	26925	31023	0.015
	XTN-C3-L-9	O=C1CN(c2c(O)ccc(N3CC4(CCN(C(=O)C5CC6(CCC6)C5)C4)C3)c2F)S(=O)(=O)N1	XTN-C3-114	C22H27N4O5FS	478.546		Small-scale ASMS	6.48	439728	61605	78913	0.039	XTN-C3 All	6.48	402758	0	0	0
	XTN-C3-L-9	O=C1CN(c2c(O)ccc(N3CC4(CCN(C(=O)C5(C(F)(F)F)CC5)C4)C3)c2F)S(=O)(=O)N1	XTN-C3-118	C19H20N4O5F4S	492.451		Small-scale ASMS	5.62	298296	51540	60346	0.03	XTN-C3 All	5.62	528	115	90	-0.047
	XTN-C3-L-10	CC1(C(=O)N2CCC3(C2)CN(c2ccc(O)c(N4CC(=O)NS4(=O)=O)c2F)C3)CCC1	XTN-C3-002	C20H25N4O5FS	452.508		Small-scale ASMS	5.52	55834	6854	8551	0.03	XTN-C3 All	5.52	49379	5014	5574	0.011
	XTN-C3-L-10	COc1ccc(C2CC2C(=O)N2CCC3(C2)CN(c2ccc(O)c(N4CC(=O)NS4(=O)=O)c2F)C3)cc1	XTN-C3-007	C25H27N4O6FS	530.578		Small-scale ASMS	6.19	754	0	117	0.155	XTN-C3 All	0	0	0	0	0
	XTN-C3-L-10	O=C1CN(c2c(O)ccc(N3CC4(CCN(C(=O)c5cnn6c5CCCC6)C4)C3)c2F)S(=O)(=O)N1	XTN-C3-010	C22H25N6O5FS	504.544	131.1	Small-scale ASMS	5.52	114021	12713	15132	0.021	XTN-C3 All	5.52	103767	8920	10268	0.013
	XTN-C3-L-10	O=C1CN(c2c(O)ccc(N3CC4(CCN(C(=O)c5nc6ccccc6[nH]5)C4)C3)c2F)S(=O)(=O)N1	XTN-C3-027	C22H21N6O5FS	500.512	32.1	Small-scale ASMS	5.47	52425	4460	6316	0.035	XTN-C3 All	5.47	195701	26377	29252	0.015
	XTN-C3-L-10	O=C1CN(c2c(O)ccc(N3CC4(CCN(C(=O)c5cc6c(F)cc(F)cc6[nH]5)C4)C3)c2F)S(=O)(=O)N1	XTN-C3-028	C23H20N5O5F3S	535.504		Small-scale ASMS	6.8	868	67	74	0.008	XTN-C3 All	6.8	7553	447	816	0.049
	XTN-C3-L-10	O=C1CN(c2c(O)ccc(N3CC4(CCN(C(=O)c5n[nH]c6cccnc56)C4)C3)c2F)S(=O)(=O)N1	XTN-C3-036	C21H20N7O5FS	501.5		Small-scale ASMS	4.05	48405	5010	6598	0.033	XTN-C3 All	4.05	47325	4014	4722	0.015
	XTN-C3-L-16	Cc1nnsc1C(=O)N1CCC2(C1)CN(c1ccc(O)c(N3CC(=O)NS3(=O)=O)c1F)C2	XTN-C3-084	C18H19N6O5FS2	482.519		Small-scale ASMS	4.99	55135	9154	10470	0.024	XTN-C3 All	4.99	45144	5964	6487	0.012
	XTN-C3-L-16	O=C1CN(c2c(O)ccc(N3CC4(CCN(C(=O)c5cnc(-c6ccccc6)s5)C4)C3)c2F)S(=O)(=O)N1	XTN-C3-085	C24H22N5O5FS2	543.602		Small-scale ASMS	6.61	490048	51321	80308	0.059	XTN-C3 All	6.61	398517	0	0	0
	XTN-C3-L-16	Cc1nc(-c2cccnc2)sc1C(=O)N1CCC2(C1)CN(c1ccc(O)c(N3CC(=O)NS3(=O)=O)c1F)C2	XTN-C3-086	C24H23N6O5FS2	558.617		Small-scale ASMS	5.41	284103	35985	44765	0.031	XTN-C3 All	5.41	309874	0	0	0
	XTN-C3-L-16	Cc1nc(-c2ccccc2)sc1C(=O)N1CCC2(C1)CN(c1ccc(O)c(N3CC(=O)NS3(=O)=O)c1F)C2	XTN-C3-087	C25H24N5O5FS2	557.629		Small-scale ASMS	6.57	608600	70143	97383	0.045	XTN-C3 All	6.57	521663	0	0	0
	XTN-C3-L-16	Nc1nsnc1C(=O)N1CCC2(C1)CN(c1ccc(O)c(N3CC(=O)NS3(=O)=O)c1F)C2	XTN-C3-098	C17H18N7O5FS2	483.507		Small-scale ASMS	5.41	154447	20752	26533	0.037	XTN-C3 All	5.41	115152	14164	16106	0.017
	XTN-C3-L-16	O=C1CN(c2c(O)ccc(N3CC4(CCN(C(=O)C5CC5)C4)C3)c2F)S(=O)(=O)N1	XTN-C3-101	C18H21N4O5FS	424.454		Small-scale ASMS	4.76	164048	28168	34915	0.041	XTN-C3 All	4.76	227	136	195	0.26
	XTN-C3-L-16	CC1(C(=O)N2CCC3(C2)CN(c2ccc(O)c(N4CC(=O)NS4(=O)=O)c2F)C3)CC1	XTN-C3-103	C19H23N4O5FS	438.481	20.45	Small-scale ASMS	4.97	227274	39402	50215	0.048	XTN-C3 All	4.97	218599	27918	31234	0.015
	Core D4
	OID	smiles	VENDOR_ID	Molecular Formula	MOLECULE_WEIGHT	PTPN2 IC50	Small-scale ASMS	Observed RT (min)	Intensity_ (no treatment)	Intensity (Ultrafiltration)	Intensity (Ultrafiltration after incubation with protein)	efficiency (Small-scale ASMS)	Large-scale ASMS	Observed RT (min) 2	Intensity_ (no treatment) 2	Intensity (Ultrafiltration) 2	Intensity (Ultrafiltration after incubation with protein) 2	efficiency (Large-scale ASMS)
	XTN-D4-L-9	O=C1CN(c2c(O)ccc(N3CCC4(CN(C(=O)C5CC6(CCC6)C5)C4)C3)c2F)S(=O)(=O)N1	XTN-D4-114	C22H27N4O5FS	478.546		Small-scale ASMS	6.73	2413	187	213	0.011	XTN-D4 All	6.73	1725	142	187	0.026
	XTN-D4-L-9	O=C1CN(c2c(O)ccc(N3CCC4(CN(C(=O)c5cc6cccnc6s5)C4)C3)c2F)S(=O)(=O)N1	XTN-D4-047	C22H20N5O5FS2	517.564		Small-scale ASMS	6.14	4865	205	285	0.016	XTN-D4 All	6.14	4479	168	278	0.025
	XTN-D4-L-9	Cc1nnsc1C(=O)N1CC2(CCN(c3ccc(O)c(N4CC(=O)NS4(=O)=O)c3F)C2)C1	XTN-D4-084	C18H19N6O5FS2	482.519		Small-scale ASMS	7.2	120	0	0	0	XTN-D4 All	0	0	0	0	0
	XTN-D4-L-9	O=C1CN(c2c(O)ccc(N3CCC4(CN(C(=O)c5cnn6ccccc56)C4)C3)c2F)S(=O)(=O)N1	XTN-D4-065	C22H21N6O5FS	500.512		Small-scale ASMS	5.57	35149	2246	3092	0.024	XTN-D4 All	5.57	32068	2790	2684	-0.003
	XTN-D4-L-9	O=C1CN(c2c(O)ccc(N3CCC4(CN(C(=O)C5CC(=O)N(Cc6ccccc6)C5)C4)C3)c2F)S(=O)(=O)N1	XTN-D4-077	C26H28N5O6FS	557.604		Small-scale ASMS	5.78	1551	115	121	0.004	XTN-D4 All	5.78	1337	119	110	-0.007
	XTN-D4-L-9	O=C1CN(c2c(O)ccc(N3CCC4(CN(C(=O)c5cnn6cccnc56)C4)C3)c2F)S(=O)(=O)N1	XTN-D4-063	C21H20N7O5FS	501.5		Small-scale ASMS	4.81	82968	6465	7617	0.014	XTN-D4 All	4.81	66356	7191	6428	-0.011
	XTN-D4-L-9	O=C1CN(c2c(O)ccc(N3CCC4(CN(C(=O)c5cncs5)C4)C3)c2F)S(=O)(=O)N1	XTN-D4-083	C18H18N5O5FS2	467.504		Small-scale ASMS	4.99	44801	2339	3140	0.018	XTN-D4 All	4.99	39602	3756	3271	-0.012
	XTN-D4-L-9	Cc1cc(C)n2nc(C(=O)N3CC4(CCN(c5ccc(O)c(N6CC(=O)NS6(=O)=O)c5F)C4)C3)nc2n1	XTN-D4-068	C22H23N8O5FS	530.542		Small-scale ASMS	5.17	15279	861	1032	0.011	XTN-D4 All	5.17	14144	1059	896	-0.012
	XTN-D4-L-10	Cc1nc(-c2ccccc2)sc1C(=O)N1CC2(CCN(c3ccc(O)c(N4CC(=O)NS4(=O)=O)c3F)C2)C1	XTN-D4-087	C25H24N5O5FS2	557.629		Small-scale ASMS	7.11	3782	130	286	0.041	XTN-D4 All	7.11	67986	4448	6209	0.026
	XTN-D4-L-10	O=C1CN(c2c(O)ccc(N3CCC4(CN(C(=O)C5C[C@H]6C=C[C@@H]5C6)C4)C3)c2F)S(=O)(=O)N1	XTN-D4-120	C22H25N4O5FS	476.53		Small-scale ASMS	6.04	2963	451	506	0.019	XTN-D4 All	6.04	6321	1059	1190	0.021
	XTN-D4-L-10	CC(C)(C)c1cc(C(=O)N2CC3(CCN(c4ccc(O)c(N5CC(=O)NS5(=O)=O)c4F)C3)C2)no1	XTN-D4-061	C22H26N5O6FS	507.544		Small-scale ASMS	7.04	2072	489	655	0.08	XTN-D4 All	7.04	19332	4933	5288	0.018
	XTN-D4-L-10	O=C1CN(c2c(O)ccc(N3CCC4(CN(C(=O)c5cnc(-c6ccccc6)s5)C4)C3)c2F)S(=O)(=O)N1	XTN-D4-085	C24H22N5O5FS2	543.602		Small-scale ASMS	6.99	9972	160	374	0.021	XTN-D4 All	6.99	61842	5133	6132	0.016
	XTN-D4-L-10	Cn1cc(C(=O)N2CC3(CCN(c4ccc(O)c(N5CC(=O)NS5(=O)=O)c4F)C3)C2)c2cccnc21	XTN-D4-107	C23H23N6O5FS	514.539		Small-scale ASMS	6.24	87760	6325	9291	0.034	XTN-D4 All	6.24	76063	9090	9975	0.012
	XTN-D4-L-10	O=C1CN(c2c(O)ccc(N3CCC4(CN(C(=O)c5cc6c(s5)CCCC6)C4)C3)c2F)S(=O)(=O)N1	XTN-D4-110	C23H25N4O5FS2	520.608		Small-scale ASMS	7.17	1922	108	171	0.033	XTN-D4 All	7.17	32093	2444	2786	0.011
	XTN-D4-L-10	Nc1c(C(=O)N2CC3(CCN(c4ccc(O)c(N5CC(=O)NS5(=O)=O)c4F)C3)C2)sc2ncccc12	XTN-D4-097	C22H21N6O5FS2	532.579		Small-scale ASMS	6.13	77036	3862	5507	0.021	XTN-D4 All	6.13	69185	4737	4967	0.003
	XTN-D4-L-10	Cc1nocc1C(=O)N1CC2(CCN(c3ccc(O)c(N4CC(=O)NS4(=O)=O)c3F)C2)C1	XTN-D4-056	C19H20N5O6FS	465.463		Small-scale ASMS	5.22	72566	7341	8263	0.013	XTN-D4 All	5.22	68635	7908	7373	-0.008
	XTN-D4-L-10	Nc1nsnc1C(=O)N1CC2(CCN(c3ccc(O)c(N4CC(=O)NS4(=O)=O)c3F)C2)C1	XTN-D4-098	C17H18N7O5FS2	483.507		Small-scale ASMS	5.66	24522	1378	1077	-0.012	XTN-D4 All	5.66	18157	1703	1531	-0.009
	XTN-D4-L-10	O=C1CN(c2c(O)ccc(N3CCC4(CN(C(=O)C5(F)CC5)C4)C3)c2F)S(=O)(=O)N1	XTN-D4-102	C18H20N4O5F2S	442.444		Small-scale ASMS	5.44	14654	834	925	0.006	XTN-D4 All	5.44	13594	927	794	-0.01
	XTN-D4-L-10	Cc1nc(C(=O)N2CC3(CCN(c4ccc(O)c(N5CC(=O)NS5(=O)=O)c4F)C3)C2)c(C)o1	XTN-D4-090	C20H22N5O6FS	479.49		Small-scale ASMS	5.5	81049	7113	7768	0.008	XTN-D4 All	5.5	69857	7605	6785	-0.012
	XTN-D4-L-10	NC(=O)C1(C(=O)N2CC3(CCN(c4ccc(O)c(N5CC(=O)NS5(=O)=O)c4F)C3)C2)CC1	XTN-D4-104	C19H22N5O6FS	467.479		Small-scale ASMS	3.9	19722	1523	1529	0	XTN-D4 All	3.9	16248	1284	1076	-0.013
	XTN-D4-L-10	Cn1nc(C(=O)N2CC3(CCN(c4ccc(O)c(N5CC(=O)NS5(=O)=O)c4F)C3)C2)c2cccnc21	XTN-D4-108	C22H22N7O5FS	515.527		Small-scale ASMS	6.11	43493	2589	3099	0.012	XTN-D4 All	6.11	43041	4182	3461	-0.017
	XTN-D4-L-10	CC1(C(=O)N2CC3(CCN(c4ccc(O)c(N5CC(=O)NS5(=O)=O)c4F)C3)C2)CC1	XTN-D4-103	C19H23N4O5FS	438.481		Small-scale ASMS	5.29	83577	8396	8396	0	XTN-D4 All	5.29	68153	8542	7170	-0.02
	XTN-D4-L-10	O=C1CN(c2c(O)ccc(N3CCC4(CN(C(=O)C5(C(F)(F)F)CC5)C4)C3)c2F)S(=O)(=O)N1	XTN-D4-118	C19H20N4O5F4S	492.451		Small-scale ASMS	6.01	28751	1122	1315	0.007	XTN-D4 All	6.01	60910	6132	4670	-0.024
	XTN-D4-L-11	O=C1CN(c2c(O)ccc(N3CCC4(CN(C(=O)C5CC(c6ccccc6)C5)C4)C3)c2F)S(=O)(=O)N1	XTN-D4-115	C25H27N4O5FS	514.579		Small-scale ASMS	5.57	82494	0	0	0	XTN-D4 All	5.57	32068	2790	2684	0
	XTN-D4-L-11	Cc1nc(-c2cccnc2)sc1C(=O)N1CC2(CCN(c3ccc(O)c(N4CC(=O)NS4(=O)=O)c3F)C2)C1	XTN-D4-086	C24H23N6O5FS2	558.617	26.41	Small-scale ASMS	6.06	20082	1512	2569	0.053	XTN-D4 All	6.06	9305	1679	1948	0.029
	XTN-D4-L-11	Cn1cc(C(=O)N2CC3(CCN(c4ccc(O)c(N5CC(=O)NS5(=O)=O)c4F)C3)C2)c2ccccc21	XTN-D4-109	C24H24N5O5FS	513.551	57.8	Small-scale ASMS	6.98	86280	545	3664	0.036	XTN-D4 All	6.98	148364	15543	22709	0.048
	XTN-D4-L-11	O=C1CN(c2c(O)ccc(N3CCC4(CN(C(=O)c5cnoc5)C4)C3)c2F)S(=O)(=O)N1	XTN-D4-060	C18H18N5O6FS	451.436		Small-scale ASMS	4.92	25858	291	934	0.025	XTN-D4 All	4.92	20321	281	865	0.029
	XTN-D4-L-11	Cc1nc(C(F)(F)F)c(C(=O)N2CC3(CCN(c4ccc(O)c(N5CC(=O)NS5(=O)=O)c4F)C3)C2)s1	XTN-D4-116	C20H19N5O5F4S2	549.528		Small-scale ASMS	6.2	8928	396	502	0.012	XTN-D4 All	6.2	6739	605	595	-0.001
	XTN-D4-L-11	O=C1CN(c2c(O)ccc(N3CCC4(CN(C(=O)c5cnn(-c6ccccc6)c5)C4)C3)c2F)S(=O)(=O)N1	XTN-D4-096	C24H23N6O5FS	526.55		Small-scale ASMS	6.63	21965	769	1198	0.02	XTN-D4 All	6.63	19293	1181	1079	-0.005
	XTN-D4-L-11	Nc1c(C(=O)N2CC3(CCN(c4ccc(O)c(N5CC(=O)NS5(=O)=O)c4F)C3)C2)cnn1-c1ccc(F)cc1	XTN-D4-095	C24H23N7O5F2S	559.555		Small-scale ASMS	6.08	26482	665	1490	0.031	XTN-D4 All	6.08	20464	1499	1363	-0.007
	XTN-D4-L-11	O=C1CN(c2c(O)ccc(N3CCC4(CN(C(=O)c5csc(-c6cccnc6)n5)C4)C3)c2F)S(=O)(=O)N1	XTN-D4-092	C23H21N6O5FS2	544.59		Small-scale ASMS	5.83	25624	663	1034	0.014	XTN-D4 All	5.83	22604	1122	940	-0.008
	XTN-D4-L-11	Cc1cc(C(=O)N2CC3(CCN(c4ccc(O)c(N5CC(=O)NS5(=O)=O)c4F)C3)C2)on1	XTN-D4-082	C19H20N5O6FS	465.463		Small-scale ASMS	5.37	16950	665	913	0.015	XTN-D4 All	5.37	13393	1024	891	-0.01
	XTN-D4-L-11	Cn1cc(C(=O)N2CC3(CCN(c4ccc(O)c(N5CC(=O)NS5(=O)=O)c4F)C3)C2)c(C(F)(F)F)n1	XTN-D4-094	C20H20N6O5F4S	532.476		Small-scale ASMS	5.69	50904	2930	4526	0.031	XTN-D4 All	5.69	40924	4570	4035	-0.013
	XTN-D4-L-11	Cc1nc(C(=O)N2CC3(CCN(c4ccc(O)c(N5CC(=O)NS5(=O)=O)c4F)C3)C2)cs1	XTN-D4-089	C19H20N5O5FS2	481.531		Small-scale ASMS	5.6	58034	2663	4139	0.025	XTN-D4 All	5.6	47110	4653	4048	-0.013
	XTN-D4-L-11	CC1(C)[C@]2(C)CC[C@]1(C(=O)N1CC3(CCN(c4ccc(O)c(N5CC(=O)NS5(=O)=O)c4F)C3)C1)OC2=O	XTN-D4-117	C24H29N4O7FS	536.582		Small-scale ASMS	6.09	6413	319	350	0.005	XTN-D4 All	6.09	5107	383	315	-0.013
	XTN-D4-L-11	O=C1CN(c2c(O)ccc(N3CCC4(CN(C(=O)C5CCc6ccccc65)C4)C3)c2F)S(=O)(=O)N1	XTN-D4-075	C24H25N4O5FS	500.552		Small-scale ASMS	6.52	11028	383	483	0.009	XTN-D4 All	6.52	7948	556	434	-0.015
	XTN-D4-L-11	CC1CC1C(=O)N1CC2(CCN(c3ccc(O)c(N4CC(=O)NS4(=O)=O)c3F)C2)C1	XTN-D4-106	C19H23N4O5FS	438.481		Small-scale ASMS	5.52	64133	3955	5645	0.026	XTN-D4 All	5.52	53785	6188	5321	-0.016
	XTN-D4-L-11	O=C1CN(c2c(O)ccc(N3CCC4(CN(C(=O)C5CC5)C4)C3)c2F)S(=O)(=O)N1	XTN-D4-101	C18H21N4O5FS	424.454		Small-scale ASMS	4.91	52134	3409	4910	0.029	XTN-D4 All	4.91	43152	5322	4605	-0.017
	XTN-D4-L-1	CC1(C(=O)N2CC3(CCN(c4ccc(O)c(N5CC(=O)NS5(=O)=O)c4F)C3)C2)CCC1	XTN-D4-002	C20H25N4O5FS	452.508		Small-scale ASMS	5.8	5928	299	308	0.002	XTN-D4 All	5.8	76105	320	296	0
	XTN-D4-L-1	COc1ccc(C2CC2C(=O)N2CC3(CCN(c4ccc(O)c(N5CC(=O)NS5(=O)=O)c4F)C3)C2)cc1	XTN-D4-007	C25H27N4O6FS	530.578		Small-scale ASMS	6.74	5934	256	298	0.007	XTN-D4 All	6.74	4351	327	286	-0.009
	XTN-D4-L-1	Cc1cc(C(=O)N2CC3(CCN(c4ccc(O)c(N5CC(=O)NS5(=O)=O)c4F)C3)C2)n[nH]1	XTN-D4-059	C19H21N6O5FS	464.479		Small-scale ASMS	4.9	83495	5030	7255	0.027	XTN-D4 All	4.9	144365	17704	15990	-0.012
	XTN-D4-L-1	O=C1CN(c2c(O)ccc(N3CCC4(CN(C(=O)C5(O)CCC5)C4)C3)c2F)S(=O)(=O)N1	XTN-D4-001	C19H23N4O6FS	454.48		Small-scale ASMS	4.33	60286	4194	5803	0.027	XTN-D4 All	4.33	45549	5680	5084	-0.013
	XTN-D4-L-1	O=C1CN(c2c(O)ccc(N3CCC4(CN(C(=O)c5cnn6c5CCCC6)C4)C3)c2F)S(=O)(=O)N1	XTN-D4-010	C22H25N6O5FS	504.544		Small-scale ASMS	5.88	10312	363	423	0.006	XTN-D4 All	5.88	8928	530	411	-0.013
	XTN-D4-L-1	O=C1CN(c2c(O)ccc(N3CCC4(CN(C(=O)C5CC5c5ccc(F)cc5)C4)C3)c2F)S(=O)(=O)N1	XTN-D4-008	C24H24N4O5F2S	518.542		Small-scale ASMS	6.68	177537	12266	17760	0.031	XTN-D4 All	6.68	219618	30416	27347	-0.014
	XTN-D4-L-1	CC(=O)N1CCC[C@@H]1C(=O)N1CC2(CCN(c3ccc(O)c(N4CC(=O)NS4(=O)=O)c3F)C2)C1	XTN-D4-003	C21H26N5O6FS	495.533		Small-scale ASMS	4.31	84799	4970	7302	0.028	XTN-D4 All	4.31	68775	7584	6606	-0.014
	XTN-D4-L-2	O=C1CN(c2c(O)ccc(N3CCC4(CN(C(=O)C5(c6ccc7c(c6)OC(F)(F)O7)CC5)C4)C3)c2F)S(=O)(=O)N1	XTN-D4-013	C25H23N4O7F3S	580.541		Small-scale ASMS	7.3	7844	282	474	0.024	XTN-D4 All	7.3	6743	442	451	0.001
	XTN-D4-L-2	O=C1CN(c2c(O)ccc(N3CCC4(CN(C(=O)C5(c6ccncc6)CC5)C4)C3)c2F)S(=O)(=O)N1	XTN-D4-014	C23H24N5O5FS	501.54		Small-scale ASMS	3.83	112836	8046	9986	0.017	XTN-D4 All	0	0	0	0	0
	XTN-D4-L-2	Cc1ccc(C2(C(=O)N3CC4(CCN(c5ccc(O)c(N6CC(=O)NS6(=O)=O)c5F)C4)C3)CC2)cc1	XTN-D4-018	C25H27N4O5FS	514.579		Small-scale ASMS	6.6	583	0	0	0	XTN-D4 All	0	0	0	0	0
	XTN-D4-L-2	O=C1CN(c2c(O)ccc(N3CCC4(CN(C(=O)C5(c6cccc(Cl)c6)CC5)C4)C3)c2F)S(=O)(=O)N1	XTN-D4-016	C24H24N4O5ClFS	534.997		Small-scale ASMS	7	1914	98	122	0.013	XTN-D4 All	7	1434	239	232	-0.005
	XTN-D4-L-2	COc1ccc(C2(C(=O)N3CC4(CCN(c5ccc(O)c(N6CC(=O)NS6(=O)=O)c5F)C4)C3)CC2)cc1	XTN-D4-017	C25H27N4O6FS	530.578		Small-scale ASMS	6.59	7620	288	400	0.015	XTN-D4 All	6.59	4351	327	286	-0.009
	XTN-D4-L-2	CN1CCC(C(=O)N2CC3(CCN(c4ccc(O)c(N5CC(=O)NS5(=O)=O)c4F)C3)C2)C1=O	XTN-D4-011	C20H24N5O6FS	481.506		Small-scale ASMS	4.11	65658	6091	6748	0.01	XTN-D4 All	4.11	49747	6617	5763	-0.017
	XTN-D4-L-2	COC(=O)C12CCC(C(=O)N3CC4(CCN(c5ccc(O)c(N6CC(=O)NS6(=O)=O)c5F)C4)C3)(CC1)C2	XTN-D4-012	C24H29N4O7FS	536.582		Small-scale ASMS	5.97	7167	292	319	0.004	XTN-D4 All	5.97	6009	439	284	-0.026
	XTN-D4-L-3	O=C1CN(c2c(O)ccc(N3CCC4(CN(C(=O)c5cc6ccccc6[nH]5)C4)C3)c2F)S(=O)(=O)N1	XTN-D4-022	C23H22N5O5FS	499.524	60.96	Small-scale ASMS	6.64	138439	9097	15609	0.047	XTN-D4 All	6.64	174558	16898	20457	0.02
	XTN-D4-L-3	O=C1CN(c2c(O)ccc(N3CCC4(CN(C(=O)c5cc6cc(F)c(F)cc6[nH]5)C4)C3)c2F)S(=O)(=O)N1	XTN-D4-026	C23H20N5O5F3S	535.504		Small-scale ASMS	7.09	20610	372	1256	0.043	XTN-D4 All	7.09	80952	5935	11512	0.069
	XTN-D4-L-3	Cc1ccc2cc(C(=O)N3CC4(CCN(c5ccc(O)c(N6CC(=O)NS6(=O)=O)c5F)C4)C3)[nH]c2c1	XTN-D4-023	C24H24N5O5FS	513.551		Small-scale ASMS	6.99	83355	6315	11582	0.063	XTN-D4 All	6.99	148364	15543	22709	0.048
	XTN-D4-L-3	COc1cc2cc(C(=O)N3CC4(CCN(c5ccc(O)c(N6CC(=O)NS6(=O)=O)c5F)C4)C3)[nH]c2cc1OC	XTN-D4-024	C25H26N5O7FS	559.576		Small-scale ASMS	6.21	146738	13489	15458	0.013	XTN-D4 All	6.21	147806	16214	16684	0.003
	XTN-D4-L-3	O=C1CN(c2c(O)ccc(N3CCC4(CN(C(=O)C5(c6ccccc6)CCCC5)C4)C3)c2F)S(=O)(=O)N1	XTN-D4-021	C26H29N4O5FS	528.606		Small-scale ASMS	7.24	49028	3159	4925	0.036	XTN-D4 All	7.24	164658	19602	19845	0.001
	XTN-D4-L-3	O=C1CN(c2c(O)ccc(N3CCC4(CN(C(=O)C5(c6ccccc6F)CCCC5)C4)C3)c2F)S(=O)(=O)N1	XTN-D4-020	C26H28N4O5F2S	546.596		Small-scale ASMS	7.12	37339	2005	2804	0.021	XTN-D4 All	7.12	153481	16575	15995	-0.004
	XTN-D4-L-3	O=C1CN(c2c(O)ccc(N3CCC4(CN(C(=O)C5(c6ccc(F)cc6)CC5)C4)C3)c2F)S(=O)(=O)N1	XTN-D4-019	C24H24N4O5F2S	518.542		Small-scale ASMS	6.71	105505	8140	9986	0.017	XTN-D4 All	6.71	219618	30416	27347	-0.014
	XTN-D4-L-4	COc1ccc2[nH]c(C(=O)N3CC4(CCN(c5ccc(O)c(N6CC(=O)NS6(=O)=O)c5F)C4)C3)cc2c1	XTN-D4-034	C24H24N5O6FS	529.55	49.69	Small-scale ASMS	6.6	21198	643	1295	0.031	XTN-D4 All	6.6	53345	4669	5671	0.019
	XTN-D4-L-4	O=C1CN(c2c(O)ccc(N3CCC4(CN(C(=O)c5cc6c(F)cc(F)cc6[nH]5)C4)C3)c2F)S(=O)(=O)N1	XTN-D4-028	C23H20N5O5F3S	535.504		Small-scale ASMS	7.05	18486	2804	7640	0.262	XTN-D4 All	7.05	80952	5935	11512	0.069
	XTN-D4-L-4	O=C1CN(c2c(O)ccc(N3CCC4(CN(C(=O)c5csc6ccccc56)C4)C3)c2F)S(=O)(=O)N1	XTN-D4-039	C23H21N4O5FS2	516.576		Small-scale ASMS	6.69	8590	348	0	-0.041	XTN-D4 All	6.69	84644	8655	9878	0.014
	XTN-D4-L-4	O=C1CN(c2c(O)ccc(N3CCC4(CN(C(=O)c5nc6ccccc6[nH]5)C4)C3)c2F)S(=O)(=O)N1	XTN-D4-027	C22H21N6O5FS	500.512		Small-scale ASMS	5.75	55045	1686	3193	0.027	XTN-D4 All	5.75	47971	3066	3075	0
	XTN-D4-L-4	Cc1cccc2[nH]c(C(=O)N3CC4(CCN(c5ccc(O)c(N6CC(=O)NS6(=O)=O)c5F)C4)C3)nc12	XTN-D4-031	C23H23N6O5FS	514.539		Small-scale ASMS	5.64	746	0	0	0	XTN-D4 All	5.64	56641	4257	4048	-0.004
	XTN-D4-L-4	Nc1ncc(C(=O)N2CC3(CCN(c4ccc(O)c(N5CC(=O)NS5(=O)=O)c4F)C3)C2)s1	XTN-D4-051	C18H19N6O5FS2	482.519		Small-scale ASMS	4.17	81311	4183	5866	0.021	XTN-D4 All	4.17	70496	6513	5912	-0.009
	XTN-D4-L-4	N#Cc1ccc2c(C(=O)N3CC4(CCN(c5ccc(O)c(N6CC(=O)NS6(=O)=O)c5F)C4)C3)c[nH]c2c1	XTN-D4-041	C24H21N6O5FS	524.534		Small-scale ASMS	6.01	17517	1511	1009	-0.029	XTN-D4 All	6.01	19692	781	591	-0.01
	XTN-D4-L-5	O=C1CN(c2c(O)ccc(N3CCC4(CN(C(=O)c5cc6cc(F)cc(F)c6[nH]5)C4)C3)c2F)S(=O)(=O)N1	XTN-D4-032	C23H20N5O5F3S	535.504	42.22	Small-scale ASMS	7.11	83352	3685	10044	0.076	XTN-D4 All	7.11	80952	5935	11512	0.069
	XTN-D4-L-5	Cc1cccc2cc(C(=O)N3CC4(CCN(c5ccc(O)c(N6CC(=O)NS6(=O)=O)c5F)C4)C3)[nH]c12	XTN-D4-025	C24H24N5O5FS	513.551	60.12	Small-scale ASMS	7	34255	1039	2565	0.045	XTN-D4 All	7	148364	15543	22709	0.048
	XTN-D4-L-5	Cc1ccc2[nH]nc(C(=O)N3CC4(CCN(c5ccc(O)c(N6CC(=O)NS6(=O)=O)c5F)C4)C3)c2c1	XTN-D4-038	C23H23N6O5FS	514.539		Small-scale ASMS	6.24	87760	6325	9291	0.034	XTN-D4 All	6.24	76063	9090	9975	0.012
	XTN-D4-L-5	O=C1CN(c2c(O)ccc(N3CCC4(CN(C(=O)c5cc6ncccc6[nH]5)C4)C3)c2F)S(=O)(=O)N1	XTN-D4-030	C22H21N6O5FS	500.512		Small-scale ASMS	3.97	109543	7889	10363	0.023	XTN-D4 All	3.97	92879	10339	10292	-0.001
	XTN-D4-L-5	O=C1CN(c2c(O)ccc(N3CCC4(CN(C(=O)C5(c6ccccn6)CC5)C4)C3)c2F)S(=O)(=O)N1	XTN-D4-015	C23H24N5O5FS	501.54		Small-scale ASMS	4.35	64513	6264	6643	0.006	XTN-D4 All	4.35	61842	7712	7355	-0.006
	XTN-D4-L-5	O=C1CN(c2c(O)ccc(N3CCC4(CN(C(=O)C5CC(O)C5)C4)C3)c2F)S(=O)(=O)N1	XTN-D4-006	C19H23N4O6FS	454.48		Small-scale ASMS	4.01	3129	0	0	0	XTN-D4 All	4.01	3416	129	94	-0.01
	XTN-D4-L-5	CC1CC(C(=O)N2CC3(CCN(c4ccc(O)c(N5CC(=O)NS5(=O)=O)c4F)C3)C2)C1	XTN-D4-005	C20H25N4O5FS	452.508		Small-scale ASMS	5.87	83402	7390	6472	-0.011	XTN-D4 All	5.87	76105	8630	6681	-0.026
	XTN-D4-L-6	Cc1ccc2[nH]c(C(=O)N3CC4(CCN(c5ccc(O)c(N6CC(=O)NS6(=O)=O)c5F)C4)C3)cc2c1	XTN-D4-033	C24H24N5O5FS	513.551	80.85	Small-scale ASMS	6.99	83355	4719	11582	0.082	XTN-D4 All	6.99	148364	15543	22709	0.048
	XTN-D4-L-6	O=C1CN(c2c(O)ccc(N3CCC4(CN(C(=O)c5c[nH]c6ccncc56)C4)C3)c2F)S(=O)(=O)N1	XTN-D4-037	C22H21N6O5FS	500.512		Small-scale ASMS	3.8	24163	1178	1817	0.026	XTN-D4 All	3.8	22588	1842	1780	-0.003
	XTN-D4-L-6	O=C1CN(c2c(O)ccc(N3CCC4(CN(C(=O)c5cnn(Cc6ccccc6)c5)C4)C3)c2F)S(=O)(=O)N1	XTN-D4-064	C25H25N6O5FS	540.577		Small-scale ASMS	6.33	1694	165	198	0.019	XTN-D4 All	6.33	41971	4033	3571	-0.011
	XTN-D4-L-6	Cc1nn(C)c(C)c1C(=O)N1CC2(CCN(c3ccc(O)c(N4CC(=O)NS4(=O)=O)c3F)C2)C1	XTN-D4-055	C21H25N6O5FS	492.533		Small-scale ASMS	4.94	26666	1462	1817	0.013	XTN-D4 All	4.94	28475	2431	2027	-0.014
	XTN-D4-L-6	O=C1CN(c2c(O)ccc(N3CCC4(CN(C(=O)c5c[nH]nn5)C4)C3)c2F)S(=O)(=O)N1	XTN-D4-070	C17H18N7O5FS	451.44		Small-scale ASMS	4.27	17370	1158	1484	0.019	XTN-D4 All	4.27	13982	1396	1170	-0.016
	XTN-D4-L-6	O=C1CN(c2c(O)ccc(N3CCC4(CN(C(=O)C5(O)CCCC5)C4)C3)c2F)S(=O)(=O)N1	XTN-D4-053	C20H25N4O6FS	468.507		Small-scale ASMS	4.59	19535	1212	1337	0.006	XTN-D4 All	4.59	30091	3236	2749	-0.016
	XTN-D4-L-6	O=C1CN(c2c(O)ccc(N3CCC4(CN(C(=O)C5CCCC5)C4)C3)c2F)S(=O)(=O)N1	XTN-D4-052	C20H25N4O5FS	452.508		Small-scale ASMS	6.02	34050	1602	1343	-0.008	XTN-D4 All	6.02	52127	4167	3024	-0.022
	XTN-D4-L-7	COc1ccc2c(C(=O)N3CC4(CCN(c5ccc(O)c(N6CC(=O)NS6(=O)=O)c5F)C4)C3)c[nH]c2c1	XTN-D4-044	C24H24N5O6FS	529.55		Small-scale ASMS	6.58	40580	2119	2798	0.017	XTN-D4 All	6.58	53345	4669	5671	0.019
	XTN-D4-L-7	O=C1CN(c2c(O)ccc(N3CCC4(CN(C(=O)c5c[nH]c6ccccc56)C4)C3)c2F)S(=O)(=O)N1	XTN-D4-040	C23H22N5O5FS	499.524		Small-scale ASMS	4.35	186	0	0	0	XTN-D4 All	0	0	0	0	0
	XTN-D4-L-7	O=C1CN(c2c(O)ccc(N3CCC4(CN(C(=O)c5c[nH]c6cccnc56)C4)C3)c2F)S(=O)(=O)N1	XTN-D4-042	C22H21N6O5FS	500.512		Small-scale ASMS	3.97	109543	7889	10363	0.023	XTN-D4 All	3.97	92879	10339	10292	-0.001
	XTN-D4-L-7	CC(=O)N1C[C@H](O)C[C@H]1C(=O)N1CC2(CCN(c3ccc(O)c(N4CC(=O)NS4(=O)=O)c3F)C2)C1	XTN-D4-004	C21H26N5O7FS	511.532		Small-scale ASMS	3.52	17286	985	1087	0.006	XTN-D4 All	3.52	15216	1120	963	-0.01
	XTN-D4-L-7	Cc1ccc2[nH]cc(C(=O)N3CC4(CCN(c5ccc(O)c(N6CC(=O)NS6(=O)=O)c5F)C4)C3)c2c1	XTN-D4-043	C24H24N5O5FS	513.551		Small-scale ASMS	6.17	4574	201	234	0.007	XTN-D4 All	6.17	10497	417	292	-0.012
	XTN-D4-L-7	Cc1nc(O)sc1C(=O)N1CC2(CCN(c3ccc(O)c(N4CC(=O)NS4(=O)=O)c3F)C2)C1	XTN-D4-054	C19H20N5O6FS2	497.53		Small-scale ASMS	4.86	18783	1186	1400	0.011	XTN-D4 All	4.86	12780	1236	1045	-0.015
	XTN-D4-L-7	Cc1ncc(C(=O)N2CC3(CCN(c4ccc(O)c(N5CC(=O)NS5(=O)=O)c4F)C3)C2)s1	XTN-D4-050	C19H20N5O5FS2	481.531		Small-scale ASMS	5.27	68347	6021	6672	0.01	XTN-D4 All	5.27	88481	9983	8700	-0.015
	XTN-D4-L-8	Cc1ccc2c(C(=O)N3CC4(CCN(c5ccc(O)c(N6CC(=O)NS6(=O)=O)c5F)C4)C3)c[nH]c2c1	XTN-D4-046	C24H24N5O5FS	513.551	26.9	Small-scale ASMS	6.99	83355	4719	11582	0.082	XTN-D4 All	6.99	148364	15543	22709	0.048
	XTN-D4-L-8	COc1ccc2[nH]cc(C(=O)N3CC4(CCN(c5ccc(O)c(N6CC(=O)NS6(=O)=O)c5F)C4)C3)c2c1	XTN-D4-045	C24H24N5O6FS	529.55		Small-scale ASMS	6.57	5854	210	302	0.016	XTN-D4 All	6.57	53345	4669	5671	0.019
	XTN-D4-L-8	Cc1oncc1C(=O)N1CC2(CCN(c3ccc(O)c(N4CC(=O)NS4(=O)=O)c3F)C2)C1	XTN-D4-057	C19H20N5O6FS	465.463		Small-scale ASMS	5.22	10161	463	531	0.007	XTN-D4 All	5.22	68635	7908	7373	-0.008
	XTN-D4-L-8	Cn1cc(C(=O)N2CC3(CCN(c4ccc(O)c(N5CC(=O)NS5(=O)=O)c4F)C3)C2)cn1	XTN-D4-062	C19H21N6O5FS	464.479		Small-scale ASMS	4.86	79798	6978	7925	0.012	XTN-D4 All	4.86	144365	17704	15990	-0.012
	XTN-D4-L-8	Cc1ncsc1C(=O)N1CC2(CCN(c3ccc(O)c(N4CC(=O)NS4(=O)=O)c3F)C2)C1	XTN-D4-081	C19H20N5O5FS2	481.531		Small-scale ASMS	5.28	31388	1890	2359	0.015	XTN-D4 All	5.28	88481	9983	8700	-0.015
	XTN-D4-L-8	O=C1CN(c2c(O)ccc(N3CCC4(CN(C(=O)c5cnco5)C4)C3)c2F)S(=O)(=O)N1	XTN-D4-079	C18H18N5O6FS	451.436		Small-scale ASMS	4.67	49654	4026	4550	0.011	XTN-D4 All	4.67	45701	5066	4297	-0.017
	XTN-D4-L-8	O=C1CN(c2c(O)ccc(N3CCC4(CN(C(=O)c5cc(-c6ccc(F)cc6)[nH]n5)C4)C3)c2F)S(=O)(=O)N1	XTN-D4-074	C24H22N6O5F2S	544.54		Small-scale ASMS	6.67	1559	220	159	-0.039	XTN-D4 All	6.67	2983	412	309	-0.035
	Core E5
	OID	smiles	VENDOR_ID	Molecular Formula	MOLECULE_WEIGHT	PTPN2 IC50	Small-scale ASMS	Observed RT (min)	Intensity_ (no treatment)	Intensity (Ultrafiltration)	Intensity (Ultrafiltration after incubation with protein)	efficiency (Small-scale ASMS)	Large-scale ASMS	Observed RT (min) 2	Intensity_ (no treatment) 2	Intensity (Ultrafiltration) 2	Intensity (Ultrafiltration after incubation with protein) 2	efficiency (Large-scale ASMS)
	XTN-E5-L-16	Cn1nc(C(=O)NC2CC3(C2)CN(c2ccc(O)c(N4CC(=O)NS4(=O)=O)c2F)C3)c2cccnc21	XTN-E5-108	C22H22N7O5FS	515.527	16.33	Small-scale ASMS	8.79	21825396	2979994	4265730	0.059	XTN-E5 All	8.79	17514220	5325	2522492	0.144
	XTN-E5-L-18	O=C1CN(c2c(O)ccc(N3CC4(CC(NC(=O)C5(c6ccc(F)cc6)CC5)C4)C3)c2F)S(=O)(=O)N1	XTN-E5-019	C24H24N4O5F2S	518.542	22.59	Small-scale ASMS	10.6	10609712	0	1584714	0.149	XTN-E5 All	10.6	41932816	367	5497338	0.131
	XTN-E5-L-19	COC(=O)C12CCC(C(=O)NC3CC4(C3)CN(c3ccc(O)c(N5CC(=O)NS5(=O)=O)c3F)C4)(CC1)C2	XTN-E5-012	C24H29N4O7FS	536.582	31.86	Small-scale ASMS	8.76	35562896	4958010	5998576	0.029	XTN-E5 All	8.76	23897882	112643	6537597	0.269
	XTN-E5-L-6	O=C1CN(c2c(O)ccc(N3CC4(CC(NC(=O)C5CC6(CCC6)C5)C4)C3)c2F)S(=O)(=O)N1	XTN-E5-114	C22H27N4O5FS	478.546	35.63	Small-scale ASMS	9.64	17413160	1670815	2527240	0.05	XTN-E5 All	9.67	2747655	143467	689653	0.25
	XTN-E5-L-19	O=C1CN(c2c(O)ccc(N3CC4(CC(NC(=O)C5(c6ccccc6)CCCC5)C4)C3)c2F)S(=O)(=O)N1	XTN-E5-021	C26H29N4O5FS	528.606	134.1	Small-scale ASMS	11.49	51676048	6342638	9377050	0.059	XTN-E5 All	11.49	30758808	244689	6636541	0.208
	XTN-E5-L-1	O=C1CN(c2c(O)ccc(N3CC4(CC(NC(=O)C5CC5c5ccc(F)cc5)C4)C3)c2F)S(=O)(=O)N1	XTN-E5-008	C24H24N4O5F2S	518.542		Small-scale ASMS	10.47	35960264	2471620	3676308	0.034	XTN-E5 All	10.6	41932816	3153	5497338	0.131
	XTN-E5-L-1	O=C1CN(c2c(O)ccc(N3CC4(CC(NC(=O)c5cnn(Cc6ccccc6)c5)C4)C3)c2F)S(=O)(=O)N1	XTN-E5-064	C25H25N6O5FS	540.577		Small-scale ASMS	9.42	26234140	1765308	3273885	0.058	XTN-E5 All	0	0	0	0	0
	XTN-E5-L-1	Cc1nc(-c2ccccc2)sc1C(=O)NC1CC2(C1)CN(c1ccc(O)c(N3CC(=O)NS3(=O)=O)c1F)C2	XTN-E5-087	C25H24N5O5FS2	557.629		Small-scale ASMS	10.93	20836514	1261643	2179184	0.044	XTN-E5 All	10.93	4254497	0	0	0
	XTN-E5-L-9	CC1(C)[C@]2(C)CC[C@]1(C(=O)NC1CC3(C1)CN(c1ccc(O)c(N4CC(=O)NS4(=O)=O)c1F)C3)OC2=O	XTN-E5-117	C24H29N4O7FS	536.582		Small-scale ASMS	9.12	5772052	428365	552401	0.021	XTN-E5 All	9.12	23897882	436465	6537597	0.255
	XTN-E5-L-9	O=C1CN(c2c(O)ccc(N3CC4(CC(NC(=O)C5CC(c6ccccc6)C5)C4)C3)c2F)S(=O)(=O)N1	XTN-E5-115	C25H27N4O5FS	514.579		Small-scale ASMS	10.36	5275918	0	0	0	XTN-E5 All	10.36	53149924	946	7898164	0.149
	XTN-E5-L-9	Cc1nc(C(F)(F)F)c(C(=O)NC2CC3(C2)CN(c2ccc(O)c(N4CC(=O)NS4(=O)=O)c2F)C3)s1	XTN-E5-116	C20H19N5O5F4S2	549.528		Small-scale ASMS	8.84	4643724	0	569193	0.123	XTN-E5 All	0	0	0	0	0
	XTN-E5-L-9	Cc1cc(C(=O)NC2CC3(C2)CN(c2ccc(O)c(N4CC(=O)NS4(=O)=O)c2F)C3)on1	XTN-E5-082	C19H20N5O6FS	465.463		Small-scale ASMS	7.7	1247090	0	0	0	XTN-E5 All	7.77	1804078	0	0	0
	XTN-E5-L-9	Cc1csc(C(=O)NC2CC3(C2)CN(c2ccc(O)c(N4CC(=O)NS4(=O)=O)c2F)C3)n1	XTN-E5-078	C19H20N5O5FS2	481.531		Small-scale ASMS	8.72	2257786	4462	0	-0.002	XTN-E5 All	8.72	6872346	0	0	0
	XTN-E5-L-10	Cn1cc(C(=O)NC2CC3(C2)CN(c2ccc(O)c(N4CC(=O)NS4(=O)=O)c2F)C3)c2cccnc21	XTN-E5-107	C23H23N6O5FS	514.539		Small-scale ASMS	8.73	58877096	0	1648620	0.028	XTN-E5 All	8.73	34245028	244	3419715	0.1
	XTN-E5-L-10	Nc1c(C(=O)NC2CC3(C2)CN(c2ccc(O)c(N4CC(=O)NS4(=O)=O)c2F)C3)cnn1-c1ccc(F)cc1	XTN-E5-095	C24H23N7O5F2S	559.555		Small-scale ASMS	9.29	35201124	0	1541078	0.044	XTN-E5 All	0	0	0	0	0
	XTN-E5-L-10	Cc1nn(C)c(C)c1C(=O)NC1CC2(C1)CN(c1ccc(O)c(N3CC(=O)NS3(=O)=O)c1F)C2	XTN-E5-055	C21H25N6O5FS	492.533		Small-scale ASMS	8.48	2397577	0	0	0	XTN-E5 All	0	0	0	0	0
	XTN-E5-L-10	Cn1cc(C(=O)NC2CC3(C2)CN(c2ccc(O)c(N4CC(=O)NS4(=O)=O)c2F)C3)cn1	XTN-E5-062	C19H21N6O5FS	464.479		Small-scale ASMS	8.12	25167504	0	0	0	XTN-E5 All	0	0	0	0	0
	XTN-E5-L-10	O=C1CN(c2c(O)ccc(N3CC4(CC(NC(=O)c5cnn6c5CCC6)C4)C3)c2F)S(=O)(=O)N1	XTN-E5-009	C21H23N6O5FS	490.517		Small-scale ASMS	8.31	29300006	0	0	0	XTN-E5 All	0	0	0	0	0
	XTN-E5-L-11	O=C1CN(c2c(O)ccc(N3CC4(CC(NC(=O)c5cc(-c6ccc(F)cc6)[nH]n5)C4)C3)c2F)S(=O)(=O)N1	XTN-E5-074	C24H22N6O5F2S	544.54		Small-scale ASMS	9.99	95035056	4946655	10248376	0.06	XTN-E5 All	10.1	1228226	313568	375107	0.28
	XTN-E5-L-11	O=C1CN(c2c(O)ccc(N3CC4(CC(NC(=O)c5cc6cc(C(F)(F)F)ccc6[nH]5)C4)C3)c2F)S(=O)(=O)N1	XTN-E5-112	C24H21N5O5F4S	567.521		Small-scale ASMS	13.21	31830690	0	3945148	0.124	XTN-E5 All	13.55	14591234	0	0	0
	XTN-E5-L-11	CC1(C(=O)NC2CC3(C2)CN(c2ccc(O)c(N4CC(=O)NS4(=O)=O)c2F)C3)CC1	XTN-E5-103	C19H23N4O5FS	438.481		Small-scale ASMS	5.18	4193715	0	427161	0.102	XTN-E5 All	0	0	0	0	0
	XTN-E5-L-11	O=C1CN(c2c(O)ccc(N3CC4(CC(NC(=O)C5CCCC5)C4)C3)c2F)S(=O)(=O)N1	XTN-E5-052	C20H25N4O5FS	452.508		Small-scale ASMS	8.17	30675548	1926231	2591384	0.022	XTN-E5 All	0	0	0	0	0
	XTN-E5-L-11	O=C1CN(c2c(O)ccc(N3CC4(CC(NC(=O)c5c[nH]nn5)C4)C3)c2F)S(=O)(=O)N1	XTN-E5-070	C17H18N7O5FS	451.44		Small-scale ASMS	2.02	471191	0	0	0	XTN-E5 All	0	0	0	0	0
	XTN-E5-L-12	O=C1CN(c2c(O)ccc(N3CC4(CC(NC(=O)c5c[nH]c6cccnc56)C4)C3)c2F)S(=O)(=O)N1	XTN-E5-042	C22H21N6O5FS	500.512		Small-scale ASMS	7.74	10579084	0	0	0	XTN-E5 All	7.74	58894480	1635	4386844	0.074
	XTN-E5-L-12	CN1CCC(C(=O)NC2CC3(C2)CN(c2ccc(O)c(N4CC(=O)NS4(=O)=O)c2F)C3)C1=O	XTN-E5-011	C20H24N5O6FS	481.506		Small-scale ASMS	6.1	9847380	0	0	0	XTN-E5 All	0	0	0	0	0
	XTN-E5-L-12	NC(=O)C1(C(=O)NC2CC3(C2)CN(c2ccc(O)c(N4CC(=O)NS4(=O)=O)c2F)C3)CC1	XTN-E5-104	C19H22N5O6FS	467.479		Small-scale ASMS	6.09	10023177	0	0	0	XTN-E5 All	6.09	1963840	0	0	0
	XTN-E5-L-12	O=C1CN(c2c(O)ccc(N3CC4(CC(NC(=O)C5CC5)C4)C3)c2F)S(=O)(=O)N1	XTN-E5-101	C18H21N4O5FS	424.454		Small-scale ASMS	7.73	16872112	0	0	0	XTN-E5 All	0	0	0	0	0
	XTN-E5-L-12	O=C1CN(c2c(O)ccc(N3CC4(CC(NC(=O)C5(F)CC5)C4)C3)c2F)S(=O)(=O)N1	XTN-E5-102	C18H20N4O5F2S	442.444		Small-scale ASMS	8.26	45399604	0	0	0	XTN-E5 All	0	0	0	0	0
	XTN-E5-L-13	O=C1CN(c2c(O)ccc(N3CC4(CC(NC(=O)C5(c6ccccc6F)CCCC5)C4)C3)c2F)S(=O)(=O)N1	XTN-E5-020	C26H28N4O5F2S	546.596		Small-scale ASMS	11.34	40801024	0	2331770	0.057	XTN-E5 All	11.34	3760360	0	0	0
	XTN-E5-L-13	CC(=O)N1C[C@H](O)C[C@H]1C(=O)NC1CC2(C1)CN(c1ccc(O)c(N3CC(=O)NS3(=O)=O)c1F)C2	XTN-E5-004	C21H26N5O7FS	511.532		Small-scale ASMS	3.15	1718292	0	0	0	XTN-E5 All	0	0	0	0	0
	XTN-E5-L-13	O=C1CN(c2c(O)ccc(N3CC4(CC(NC(=O)c5cnc[nH]5)C4)C3)c2F)S(=O)(=O)N1	XTN-E5-072	C18H19N6O5FS	450.452		Small-scale ASMS	11.49	2578343	0	0	0	XTN-E5 All	0	0	0	0	0
	XTN-E5-L-13	O=C1CN(c2c(O)ccc(N3CC4(CC(NC(=O)C5(O)CCC5)C4)C3)c2F)S(=O)(=O)N1	XTN-E5-001	C19H23N4O6FS	454.48		Small-scale ASMS	6.78	2911911	0	0	0	XTN-E5 All	0	0	0	0	0
	XTN-E5-L-13	CC1(C(=O)NC2CC3(C2)CN(c2ccc(O)c(N4CC(=O)NS4(=O)=O)c2F)C3)CCC1	XTN-E5-002	C20H25N4O5FS	452.508		Small-scale ASMS	8.55	24862886	0	0	0	XTN-E5 All	0	0	0	0	0
	XTN-E5-L-14	COc1ccc(C2(C(=O)NC3CC4(C3)CN(c3ccc(O)c(N5CC(=O)NS5(=O)=O)c3F)C4)CC2)cc1	XTN-E5-017	C25H27N4O6FS	530.578		Small-scale ASMS	10.36	15032459	1608905	2547101	0.062	XTN-E5 All	10.36	14798309	8211	2710011	0.183
	XTN-E5-L-14	Cc1ccc2cc(C(=O)NC3CC4(C3)CN(c3ccc(O)c(N5CC(=O)NS5(=O)=O)c3F)C4)[nH]c2c1	XTN-E5-023	C24H24N5O5FS	513.551		Small-scale ASMS	10.91	45734200	4396103	8533880	0.09	XTN-E5 All	10.91	56423924	1532	9044233	0.16
	XTN-E5-L-14	Cc1cc(C(=O)NC2CC3(C2)CN(c2ccc(O)c(N4CC(=O)NS4(=O)=O)c2F)C3)n[nH]1	XTN-E5-059	C19H21N6O5FS	464.479		Small-scale ASMS	2.1	4874236	0	0	0	XTN-E5 All	2	7381142	0	0	0
	XTN-E5-L-14	O=C1CN(c2c(O)ccc(N3CC4(CC(NC(=O)C5(c6ccc7c(c6)OC(F)(F)O7)CC5)C4)C3)c2F)S(=O)(=O)N1	XTN-E5-013	C25H23N4O7F3S	580.541		Small-scale ASMS	13.76	19640860	0	0	0	XTN-E5 All	13.76	23631294	0	0	0
	XTN-E5-L-15	Cc1cccc2cc(C(=O)NC3CC4(C3)CN(c3ccc(O)c(N5CC(=O)NS5(=O)=O)c3F)C4)[nH]c12	XTN-E5-025	C24H24N5O5FS	513.551		Small-scale ASMS	10.91	12158420	1586342	2576540	0.081	XTN-E5 All	10.91	56423924	686	9044233	0.16
	XTN-E5-L-15	O=C1CN(c2c(O)ccc(N3CC4(CC(NC(=O)c5cc6c(F)cc(F)cc6[nH]5)C4)C3)c2F)S(=O)(=O)N1	XTN-E5-028	C23H20N5O5F3S	535.504		Small-scale ASMS	11.11	41030664	3139988	6699025	0.087	XTN-E5 All	11.11	32662772	2478	3858743	0.118
	XTN-E5-L-15	Cc1cccc2[nH]c(C(=O)NC3CC4(C3)CN(c3ccc(O)c(N5CC(=O)NS5(=O)=O)c3F)C4)nc12	XTN-E5-031	C23H23N6O5FS	514.539		Small-scale ASMS	9.38	21090160	0	0	0	XTN-E5 All	9.38	34245028	7543	3419715	0.1
	XTN-E5-L-16	Nc1c(C(=O)NC2CC3(C2)CN(c2ccc(O)c(N4CC(=O)NS4(=O)=O)c2F)C3)sc2ncccc12	XTN-E5-097	C22H21N6O5FS2	532.579		Small-scale ASMS	8.81	15428090	0	2090478	0.135	XTN-E5 All	8.81	10079827	745	1411068	0.14
	XTN-E5-L-16	Cc1ccc2[nH]nc(C(=O)NC3CC4(C3)CN(c3ccc(O)c(N5CC(=O)NS5(=O)=O)c3F)C4)c2c1	XTN-E5-038	C23H23N6O5FS	514.539		Small-scale ASMS	9.38	40944704	0	4042039	0.099	XTN-E5 All	9.38	34245028	2468	3419715	0.1
	XTN-E5-L-17	COc1cc2cc(C(=O)NC3CC4(C3)CN(c3ccc(O)c(N5CC(=O)NS5(=O)=O)c3F)C4)[nH]c2cc1OC	XTN-E5-024	C25H26N5O7FS	559.576		Small-scale ASMS	9.14	19841820	1840501	3860060	0.102	XTN-E5 All	9.14	11411982	5326	2131954	0.186
	XTN-E5-L-17	Cc1ccc2[nH]c(C(=O)NC3CC4(C3)CN(c3ccc(O)c(N5CC(=O)NS5(=O)=O)c3F)C4)cc2c1	XTN-E5-033	C24H24N5O5FS	513.551		Small-scale ASMS	10.92	34783140	3209685	7131147	0.113	XTN-E5 All	10.92	56423924	1043	9044233	0.16
	XTN-E5-L-17	O=C1CN(c2c(O)ccc(N3CC4(CC(NC(=O)c5cc6cc(F)c(F)cc6[nH]5)C4)C3)c2F)S(=O)(=O)N1	XTN-E5-026	C23H20N5O5F3S	535.504		Small-scale ASMS	11.36	25931516	1949469	5698677	0.145	XTN-E5 All	11.36	22118258	3562	3295832	0.149
	XTN-E5-L-17	O=C1CN(c2c(O)ccc(N3CC4(CC(NC(=O)c5cc6sccc6[nH]5)C4)C3)c2F)S(=O)(=O)N1	XTN-E5-073	C21H20N5O5FS2	505.553		Small-scale ASMS	9.5	38463768	3564629	1486111	-0.054	XTN-E5 All	9.5	18192488	956	2582664	0.142
	XTN-E5-L-18	COc1ccc2[nH]c(C(=O)NC3CC4(C3)CN(c3ccc(O)c(N5CC(=O)NS5(=O)=O)c3F)C4)cc2c1	XTN-E5-034	C24H24N5O6FS	529.55		Small-scale ASMS	9.87	20735150	2505816	4017508	0.073	XTN-E5 All	9.87	13840994	735	2831573	0.205
	XTN-E5-L-18	O=C1CN(c2c(O)ccc(N3CC4(CC(NC(=O)c5cc6cc(F)cc(F)c6[nH]5)C4)C3)c2F)S(=O)(=O)N1	XTN-E5-032	C23H20N5O5F3S	535.504		Small-scale ASMS	11.69	46824640	3541047	8724718	0.111	XTN-E5 All	11.69	40308980	2174	6026886	0.149
	XTN-E5-L-1	O=C1CN(c2c(O)ccc(N3CC4(CC(NC(=O)c5cnn(-c6ccccc6)c5)C4)C3)c2F)S(=O)(=O)N1	XTN-E5-096	C24H23N6O5FS	526.55		Small-scale ASMS	9.83	89556944	5532647	9270671	0.04	XTN-E5 All	9.83	1068077	0	0	0
	XTN-E5-L-1	Cc1nnsc1C(=O)NC1CC2(C1)CN(c1ccc(O)c(N3CC(=O)NS3(=O)=O)c1F)C2	XTN-E5-084	C18H19N6O5FS2	482.519		Small-scale ASMS	7.82	10001183	816779	1021073	0.02	XTN-E5 All	0	0	0	0	0
	XTN-E5-L-1	O=C1CN(c2c(O)ccc(N3CC4(CC(NC(=O)c5cnoc5)C4)C3)c2F)S(=O)(=O)N1	XTN-E5-060	C18H18N5O6FS	451.436		Small-scale ASMS	2.59	12794626	638446	554385	-0.007	XTN-E5 All	0	0	0	0	0
	XTN-E5-L-19	O=C1CN(c2c(O)ccc(N3CC4(CC(NC(=O)c5cc6cccnc6s5)C4)C3)c2F)S(=O)(=O)N1	XTN-E5-047	C22H20N5O5FS2	517.564		Small-scale ASMS	9.15	24302138	2072502	3073353	0.041	XTN-E5 All	9.15	14714978	463	1554137	0.106
	XTN-E5-L-19	O=C1CN(c2c(O)ccc(N3CC4(CC(NC(=O)c5cc6cc(C(F)(F)F)cnc6[nH]5)C4)C3)c2F)S(=O)(=O)N1	XTN-E5-111	C23H20N6O5F4S	568.509		Small-scale ASMS	11.72	3687881	0	0	0	XTN-E5 All	11.72	2440787	0	0	0
	XTN-E5-L-19	Nc1nsnc1C(=O)NC1CC2(C1)CN(c1ccc(O)c(N3CC(=O)NS3(=O)=O)c1F)C2	XTN-E5-098	C17H18N7O5FS2	483.507		Small-scale ASMS	8.1	4286899	0	0	0	XTN-E5 All	8.1	2152758	0	0	0
	XTN-E5-L-19	O=C1CN(c2c(O)ccc(N3CC4(CC(NC(=O)[C@@H]5C[C@H]6C=C[C@@H]5C6)C4)C3)c2F)S(=O)(=O)N1	XTN-E5-120	C22H25N4O5FS	476.53		Small-scale ASMS	8.66	8194158	0	0	0	XTN-E5 All	8.6	9532193	0	0	0
	XTN-E5-L-19	Cc1ccc(C2(C(=O)NC3CC4(C3)CN(c3ccc(O)c(N5CC(=O)NS5(=O)=O)c3F)C4)CC2)cc1	XTN-E5-018	C25H27N4O5FS	514.579		Small-scale ASMS	11.16	83852728	7687368	11752247	0.048	XTN-E5 All	11.16	53149924	3578	7898164	0.149
	XTN-E5-L-19	O=C1CN(c2c(O)ccc(N3CC4(CC(NC(=O)c5nc6ccccc6[nH]5)C4)C3)c2F)S(=O)(=O)N1	XTN-E5-027	C22H21N6O5FS	500.512		Small-scale ASMS	8.79	96040200	6681587	11382178	0.05	XTN-E5 All	8.79	5889448	354	433018	0.07
	XTN-E5-L-2	O=C1CN(c2c(O)ccc(N3CC4(CC(NC(=O)c5cc6ccccc6[nH]5)C4)C3)c2F)S(=O)(=O)N1	XTN-E5-022	C23H22N5O5FS	499.524		Small-scale ASMS	9.93	10042525	781430	1048020	0.03	XTN-E5 All	9.98	1264028	3578	183927	0.15
	XTN-E5-L-2	O=C1CN(c2c(O)ccc(N3CC4(CC(NC(=O)c5cnn6c5CCCC6)C4)C3)c2F)S(=O)(=O)N1	XTN-E5-010	C22H25N6O5FS	504.544		Small-scale ASMS	8.63	41044233	4005972	3731028	-0.01	XTN-E5 All	8.61	5909945	362	737070	0.12
	XTN-E5-L-2	Cn1cc(C(=O)NC2CC3(C2)CN(c2ccc(O)c(N4CC(=O)NS4(=O)=O)c2F)C3)c(C(F)(F)F)n1	XTN-E5-094	C20H20N6O5F4S	532.476		Small-scale ASMS	8.52	32344998	3019867	3336395	0.01	XTN-E5 All	8.51	3744266	625	402089	0.11
	XTN-E5-L-2	O=C1CN(c2c(O)ccc(N3CC4(CC(NC(=O)c5csc(-c6ccc(F)cc6)n5)C4)C3)c2F)S(=O)(=O)N1	XTN-E5-093	C24H21N5O5F2S2	561.592		Small-scale ASMS	12.41	43965686	2715195	4290418	0.04	XTN-E5 All	12.68	5495563	906310	906310	0
	XTN-E5-L-2	O=C1CN(c2c(O)ccc(N3CC4(CC(NC(=O)c5csc6ccccc56)C4)C3)c2F)S(=O)(=O)N1	XTN-E5-039	C23H21N4O5FS2	516.576		Small-scale ASMS	10.24	54927667	4272978	5461235	0.02	XTN-E5 All	10.31	6646398	1035835	1035835	0
	XTN-E5-L-3	O=C1CN(c2c(O)ccc(N3CC4(CC(NC(=O)c5cnn6cccnc56)C4)C3)c2F)S(=O)(=O)N1	XTN-E5-063	C21H20N7O5FS	501.5		Small-scale ASMS	8.17	15905016	1138709	1349742	0.013	XTN-E5 All	8.2	1671200	0	0	0
	XTN-E5-L-3	O=C1CN(c2c(O)ccc(N3CC4(CC(NC(=O)c5cnc(C(F)(F)F)s5)C4)C3)c2F)S(=O)(=O)N1	XTN-E5-113	C19H17N5O5F4S2	535.501		Small-scale ASMS	10.25	81491912	6274285	7198204	0.011	XTN-E5 All	10.33	4810960	0	0	0
	XTN-E5-L-3	O=C1CN(c2c(O)ccc(N3CC4(CC(NC(=O)C5(c6cccc(Cl)c6)CC5)C4)C3)c2F)S(=O)(=O)N1	XTN-E5-016	C24H24N4O5ClFS	534.997		Small-scale ASMS	11.52	40591760	3242083	3659077	0.01	XTN-E5 All	11.52	5273251	0	0	0
	XTN-E5-L-3	Cc1nc(C(=O)NC2CC3(C2)CN(c2ccc(O)c(N4CC(=O)NS4(=O)=O)c2F)C3)cs1	XTN-E5-089	C19H20N5O5FS2	481.531		Small-scale ASMS	8.27	30523044	2689962	2724254	0.001	XTN-E5 All	8.37	6872346	0	0	0
	XTN-E5-L-3	Cc1oncc1C(=O)NC1CC2(C1)CN(c1ccc(O)c(N3CC(=O)NS3(=O)=O)c1F)C2	XTN-E5-057	C19H20N5O6FS	465.463		Small-scale ASMS	7.66	8541403	0	0	0	XTN-E5 All	7.8	1804078	0	0	0
	XTN-E5-L-4	O=C1CN(c2c(O)ccc(N3CC4(CC(NC(=O)c5cc6ccccc6s5)C4)C3)c2F)S(=O)(=O)N1	XTN-E5-048	C23H21N4O5FS2	516.576		Small-scale ASMS	10.75	50344876	3695167	8444998	0.094	XTN-E5 All	10.75	66463988	3521	10358354	0.156
	XTN-E5-L-4	O=C1CN(c2c(O)ccc(N3CC4(CC(NC(=O)c5cnn6ccccc56)C4)C3)c2F)S(=O)(=O)N1	XTN-E5-065	C22H21N6O5FS	500.512		Small-scale ASMS	8.27	7086350	1005946	973225	-0.005	XTN-E5 All	8.27	58894480	534	4330186	0.074
	XTN-E5-L-4	Cc1ncc(C(=O)NC2CC3(C2)CN(c2ccc(O)c(N4CC(=O)NS4(=O)=O)c2F)C3)s1	XTN-E5-050	C19H20N5O5FS2	481.531		Small-scale ASMS	4.57	750802	0	0	0	XTN-E5 All	4.57	6872346	0	0	0
	XTN-E5-L-4	Cc1nocc1C(=O)NC1CC2(C1)CN(c1ccc(O)c(N3CC(=O)NS3(=O)=O)c1F)C2	XTN-E5-056	C19H20N5O6FS	465.463		Small-scale ASMS	3.6	1051998	0	0	0	XTN-E5 All	3.6	2614680	0	0	0
	XTN-E5-L-5	Cn1cnc(C(=O)NC2CC3(C2)CN(c2ccc(O)c(N4CC(=O)NS4(=O)=O)c2F)C3)c1	XTN-E5-067	C19H21N6O5FS	464.479		Small-scale ASMS	2.07	10057919	1648580	3189730	0.153	XTN-E5 All	0	0	0	0	0
	XTN-E5-L-5	O=C1CN(c2c(O)ccc(N3CC4(CC(NC(=O)C5CCc6ccccc65)C4)C3)c2F)S(=O)(=O)N1	XTN-E5-075	C24H25N4O5FS	500.552		Small-scale ASMS	9.51	20882814	1744100	2598282	0.04	XTN-E5 All	9.47	2714033	9535	416460	0.15
	XTN-E5-L-5	Cc1nc(C(=O)NC2CC3(C2)CN(c2ccc(O)c(N4CC(=O)NS4(=O)=O)c2F)C3)c(C)o1	XTN-E5-090	C20H22N5O6FS	479.49		Small-scale ASMS	8.4	59531760	4789785	5939428	0.019	XTN-E5 All	8.33	8421976	0	0	0
	XTN-E5-L-5	Cc1scnc1C(=O)NC1CC2(C1)CN(c1ccc(O)c(N3CC(=O)NS3(=O)=O)c1F)C2	XTN-E5-088	C19H20N5O5FS2	481.531		Small-scale ASMS	8.43	35287060	2962707	3458490	0.014	XTN-E5 All	8.37	6872346	0	0	0
	XTN-E5-L-5	Cc1nc(C(=O)NC2CC3(C2)CN(c2ccc(O)c(N4CC(=O)NS4(=O)=O)c2F)C3)co1	XTN-E5-091	C19H20N5O6FS	465.463		Small-scale ASMS	2.61	10657734	1963285	1935463	-0.003	XTN-E5 All	2.61	1804078	0	0	0
	XTN-E5-L-6	Cn1cc(C(=O)NC2CC3(C2)CN(c2ccc(O)c(N4CC(=O)NS4(=O)=O)c2F)C3)c2ccccc21	XTN-E5-109	C24H24N5O5FS	513.551		Small-scale ASMS	9.41	26237318	2615563	4771092	0.082	XTN-E5 All	9.41	56423924	789	9044233	0.16
	XTN-E5-L-6	O=C1CN(c2c(O)ccc(N3CC4(CC(NC(=O)c5cc6c(s5)CCCC6)C4)C3)c2F)S(=O)(=O)N1	XTN-E5-110	C23H25N4O5FS2	520.608		Small-scale ASMS	11.09	10219048	822112	1727336	0.09	XTN-E5 All	0	0	0	0	0
	XTN-E5-L-6	O=C1CN(c2c(O)ccc(N3CC4(CC(NC(=O)c5csc(-c6cccnc6)n5)C4)C3)c2F)S(=O)(=O)N1	XTN-E5-092	C23H21N6O5FS2	544.59		Small-scale ASMS	8.65	26451152	2289010	3064651	0.029	XTN-E5 All	8.73	7498148	0	0	0
	XTN-E5-L-6	Nc1nonc1C(=O)NC1CC2(C1)CN(c1ccc(O)c(N3CC(=O)NS3(=O)=O)c1F)C2	XTN-E5-099	C17H18N7O6FS	467.439		Small-scale ASMS	6.8	1639977	0	0	0	XTN-E5 All	0	0	0	0	0
	XTN-E5-L-1	COc1ccc(C2CC2C(=O)NC2CC3(C2)CN(c2ccc(O)c(N4CC(=O)NS4(=O)=O)c2F)C3)cc1	XTN-E5-007	C25H27FN4O6S	530.578		Small-scale ASMS	10.11	22525348	1605722	2739084	0.05	XTN-E5 All	10.13	11543404	387	2050579	0.178
	XTN-E5-L-7	O=C1CN(c2c(O)ccc(N3CC4(CC(NC(=O)C5CC(=O)N(Cc6ccccc6)C5)C4)C3)c2F)S(=O)(=O)N1	XTN-E5-077	C26H28N5O6FS	557.604		Small-scale ASMS	8.98	12579006	0	533200	0.042	XTN-E5 All	0	0	0	0	0
	XTN-E5-L-7	O=C1CN(c2c(O)ccc(N3CC4(CC(NC(=O)c5cnco5)C4)C3)c2F)S(=O)(=O)N1	XTN-E5-079	C18H18N5O6FS	451.436		Small-scale ASMS	7.92	4589434	0	0	0	XTN-E5 All	0	0	0	0	0
	XTN-E5-L-7	O=C1CN(c2c(O)ccc(N3CC4(CC(NC(=O)c5cncs5)C4)C3)c2F)S(=O)(=O)N1	XTN-E5-083	C18H18N5O5FS2	467.504		Small-scale ASMS	8.25	5714353	0	0	0	XTN-E5 All	0	0	0	0	0
	XTN-E5-L-7	Cc1ncsc1C(=O)NC1CC2(C1)CN(c1ccc(O)c(N3CC(=O)NS3(=O)=O)c1F)C2	XTN-E5-081	C19H20N5O5FS2	481.531		Small-scale ASMS	8.32	6564023	0	0	0	XTN-E5 All	8.37	6872346	0	0	0
	XTN-E5-L-8	O=C1CN(c2c(O)ccc(N3CC4(CC(NC(=O)c5nccs5)C4)C3)c2F)S(=O)(=O)N1	XTN-E5-080	C18H18N5O5FS2	467.504		Small-scale ASMS	7.92	3089845	0	441023	0.143	XTN-E5 All	0	0	0	0	0
	XTN-E5-L-8	O=C1CN(c2c(O)ccc(N3CC4(CC(NC(=O)c5cnc(-c6ccccc6)s5)C4)C3)c2F)S(=O)(=O)N1	XTN-E5-085	C24H22N5O5FS2	543.602		Small-scale ASMS	10.72	69073000	3190265	6179381	0.043	XTN-E5 All	10.72	8638251	0	0	0
	XTN-E5-L-8	CC(C)(C)c1cc(C(=O)NC2CC3(C2)CN(c2ccc(O)c(N4CC(=O)NS4(=O)=O)c2F)C3)no1	XTN-E5-061	C22H26N5O6FS	507.544		Small-scale ASMS	10.76	44480544	2306852	3707723	0.031	XTN-E5 All	10.76	3794211	0	0	0
	XTN-E5-L-8	Cc1nc(-c2cccnc2)sc1C(=O)NC1CC2(C1)CN(c1ccc(O)c(N3CC(=O)NS3(=O)=O)c1F)C2	XTN-E5-086	C24H23N6O5FS2	558.617		Small-scale ASMS	8.7	10462471	466427	0	-0.045	XTN-E5 All	0	0	0	0	0
	Core F6
	OID	smiles	VENDOR_ID	Molecular Formula	MOLECULE_WEIGHT	PTPN2 IC50	Small-scale ASMS	Observed RT (min)	Intensity_ (no treatment)	Intensity (Ultrafiltration)	Intensity (Ultrafiltration after incubation with protein)	efficiency (Small-scale ASMS)	Large-scale ASMS	Observed RT (min) 2	Intensity_ (no treatment) 2	Intensity (Ultrafiltration) 2	Intensity (Ultrafiltration after incubation with protein) 2	efficiency (Large-scale ASMS)
	XTN-F6-L-18	O=C1CN(c2c(O)ccc(N3CC4CN(C(=O)c5cnn6ccccc56)CC4C3)c2F)S(=O)(=O)N1	XTN-F6-065	C22H21N6O5FS	500.512	60.12	Small-scale ASMS	3.94	25457	1662	2291	0.025	XTN-F6 All	3.94	83107	8126	10169	0.025
	XTN-F6-L-16	Cc1nc(-c2cccnc2)sc1C(=O)N1CC2CN(c3ccc(O)c(N4CC(=O)NS4(=O)=O)c3F)CC2C1	XTN-F6-086	C24H23N6O5FS2	558.617	63.58	Small-scale ASMS	5.64	34657	1538	3140	0.046	XTN-F6 All	5.64	29721	2189	2536	0.012
	XTN-F6-L-12	O=C1CN(c2c(O)ccc(N3CC4CN(C(=O)C5(c6ccccc6)CCCC5)CC4C3)c2F)S(=O)(=O)N1	XTN-F6-021	C26H29N4O5FS	528.606	105.4	Small-scale ASMS	7.22	7931	432	680	0.031	XTN-F6 All	7.22	9648	709	927	0.023
	XTN-F6-L-15	O=C1CN(c2c(O)ccc(N3CC4CN(C(=O)C5(O)CCC5)CC4C3)c2F)S(=O)(=O)N1	XTN-F6-001	C19H23N4O6FS	454.48	121.7	Small-scale ASMS	4.92	34195	2598	3232	0.019	XTN-F6 All	4.92	32788	2719	3255	0.016
	XTN-F6-L-17	O=C1CN(c2c(O)ccc(N3CC4CN(C(=O)c5c[nH]c6cccnc56)CC4C3)c2F)S(=O)(=O)N1	XTN-F6-042	C22H21N6O5FS	500.512	139.7	Small-scale ASMS	5.52	40543	2421	3611	0.029	XTN-F6 All	5.52	35696	3558	4113	0.016
	XTN-F6-L-4	O=C1CN(c2c(O)ccc(N3CC4CN(C(=O)c5cc6ccccc6[nH]5)CC4C3)c2F)S(=O)(=O)N1	XTN-F6-022	C23H22N5O5FS	499.524	195.4	Small-scale ASMS	6.71	117055	8003	16005	0.068	XTN-F6 All	6.71	36420	2904	4223	0.036
	XTN-F6-L-17	O=C1CN(c2c(O)ccc(N3CC4CN(C(=O)c5cnn6cccnc56)CC4C3)c2F)S(=O)(=O)N1	XTN-F6-063	C21H20N7O5FS	501.5	214.5	Small-scale ASMS	4.71	79787	4740	7010	0.028	XTN-F6 All	4.71	75854	6017	7010	0.013
	XTN-F6-L-4	O=C1CN(c2c(O)ccc(N3CC4CN(C(=O)c5cc6c(s5)CCCC6)CC4C3)c2F)S(=O)(=O)N1	XTN-F6-110	C23H25N4O5FS2	520.608	229.8	Small-scale ASMS	7.24	314517	19890	39430	0.062	XTN-F6 All	7.24	88823	2240	11076	0.099
	XTN-F6-L-4	O=C1CN(c2c(O)ccc(N3CC4CN(C(=O)c5cc6ccccc6s5)CC4C3)c2F)S(=O)(=O)N1	XTN-F6-048	C23H21N4O5FS2	516.576	238.6	Small-scale ASMS	6.7	51135	1665	2685	0.02	XTN-F6 All	6.7	69459	5722	6748	0.015
	XTN-F6-L-5	COc1ccc(C2CC2C(=O)N2CC3CN(c4ccc(O)c(N5CC(=O)NS5(=O)=O)c4F)CC3C2)cc1	XTN-F6-007	C25H27N4O6FS	530.578	253.4	Small-scale ASMS	6.79	351263	27394	48144	0.059	XTN-F6 All	6.79	114061	9921	12190	0.02
	XTN-F6-L-4	Cn1cc(C(=O)N2CC3CN(c4ccc(O)c(N5CC(=O)NS5(=O)=O)c4F)CC3C2)c2ccccc21	XTN-F6-109	C24H24N5O5FS	513.551	277.6	Small-scale ASMS	6.37	85250	5773	9565	0.044	XTN-F6 All	6.37	33860	409	2611	0.065
	XTN-F6-L-6	O=C1CN(c2c(O)ccc(N3CC4CN(C(=O)c5cc(O)no5)CC4C3)c2F)S(=O)(=O)N1	XTN-F6-119	C18H18N5O7FS	467.435		Small-scale ASMS	4.76	1003	139	217	0.078	XTN-F6 All	4.76	427	0	66	0.155
	XTN-F6-L-5	O=C1CN(c2c(O)ccc(N3CC4CN(C(=O)c5cnn6c5CCC6)CC4C3)c2F)S(=O)(=O)N1	XTN-F6-009	C21H23N6O5FS	490.517		Small-scale ASMS	5.11	1468	277	255	-0.015	XTN-F6 All	5.11	584	0	84	0.144
	XTN-F6-L-13	O=C1CN(c2c(O)ccc(N3CC4CN(C(=O)c5cc6cc(C(F)(F)F)ccc6[nH]5)CC4C3)c2F)S(=O)(=O)N1	XTN-F6-112	C24H21N5O5F4S	567.521		Small-scale ASMS	7.55	2562	87	346	0.101	XTN-F6 All	7.55	949	108	166	0.061
	XTN-F6-L-3	Nc1c(C(=O)N2CC3CN(c4ccc(O)c(N5CC(=O)NS5(=O)=O)c4F)CC3C2)cnn1-c1ccc(F)cc1	XTN-F6-095	C24H23N7O5F2S	559.555		Small-scale ASMS	10.08	23670774	22345	3898564	0.164	XTN-F6 All	6.16	14192	65	702	0.045
	XTN-F6-L-9	NC(=O)C1(C(=O)N2CC3CN(c4ccc(O)c(N5CC(=O)NS5(=O)=O)c4F)CC3C2)CC1	XTN-F6-104	C19H22N5O6FS	467.479		Small-scale ASMS	4.04	13057	930	2551	0.124	XTN-F6 All	4.04	10230	177	640	0.045
	XTN-F6-L-3	O=C1CN(c2c(O)ccc(N3CC4CN(C(=O)c5cnn(-c6ccccc6)c5)CC4C3)c2F)S(=O)(=O)N1	XTN-F6-096	C24H23N6O5FS	526.55		Small-scale ASMS	11.28	91602128	1343	14223828	0.16	XTN-F6 All	6.6	52517	2984	4852	0.04
	XTN-F6-L-9	Cc1ccc2[nH]c(C(=O)N3CC4CN(c5ccc(O)c(N6CC(=O)NS6(=O)=O)c5F)CC4C3)cc2c1	XTN-F6-033	C24H24N5O5FS	513.551		Small-scale ASMS	7.04	32876	1530	3877	0.071	XTN-F6 All	7.04	21967	1249	2133	0.04
	XTN-F6-L-2	O=C1CN(c2c(O)ccc(N3CC4CN(C(=O)c5csc(-c6ccc(F)cc6)n5)CC4C3)c2F)S(=O)(=O)N1	XTN-F6-093	C24H21N5O5F2S2	561.592		Small-scale ASMS	13.87	12820567	1885893	2711965	0.06	XTN-F6 All	7.29	105101	8031	12265	0.04
	XTN-F6-L-14	Cc1cccc2cc(C(=O)N3CC4CN(c5ccc(O)c(N6CC(=O)NS6(=O)=O)c5F)CC4C3)[nH]c12	XTN-F6-025	C24H24N5O5FS	513.551		Small-scale ASMS	7.05	33972	2330	3618	0.038	XTN-F6 All	7.05	21967	1249	2133	0.04
	XTN-F6-L-13	Cc1ccc2cc(C(=O)N3CC4CN(c5ccc(O)c(N6CC(=O)NS6(=O)=O)c5F)CC4C3)[nH]c2c1	XTN-F6-023	C24H24N5O5FS	513.551		Small-scale ASMS	7.05	109835	1530	3877	0.021	XTN-F6 All	7.05	21967	1249	2133	0.04
	XTN-F6-L-12	O=C1CN(c2c(O)ccc(N3CC4CN(C(=O)C5(c6ccccc6F)CCCC5)CC4C3)c2F)S(=O)(=O)N1	XTN-F6-020	C26H28N4O5F2S	546.596		Small-scale ASMS	7.09	5973	408	644	0.04	XTN-F6 All	7.09	39992	1771	3268	0.037
	XTN-F6-L-2	O=C1CN(c2c(O)ccc(N3CC4CN(C(=O)c5cnc(-c6ccccc6)s5)CC4C3)c2F)S(=O)(=O)N1	XTN-F6-085	C24H22N5O5FS2	543.602		Small-scale ASMS	6.98	88399272	12806239	20623224	0.088	XTN-F6 All	6.98	66077	7026	9402	0.036
	XTN-F6-L-9	O=C1CN(c2c(O)ccc(N3CC4CN(C(=O)C5CC5)CC4C3)c2F)S(=O)(=O)N1	XTN-F6-101	C18H21N4O5FS	424.454		Small-scale ASMS	4.99	278175	0	57	0	XTN-F6 All	4.99	55635	5682	7428	0.031
	XTN-F6-L-17	COc1cc2cc(C(=O)N3CC4CN(c5ccc(O)c(N6CC(=O)NS6(=O)=O)c5F)CC4C3)[nH]c2cc1OC	XTN-F6-024	C25H26N5O7FS	559.576		Small-scale ASMS	6.2	717	58	79	0.029	XTN-F6 All	6.2	601	65	83	0.03
	XTN-F6-L-10	O=C1CN(c2c(O)ccc(N3CC4CN(C(=O)c5cc6ncccc6[nH]5)CC4C3)c2F)S(=O)(=O)N1	XTN-F6-030	C22H21N6O5FS	500.512		Small-scale ASMS	3.97	193360	13537	12578	-0.005	XTN-F6 All	3.97	83107	8126	10169	0.025
	XTN-F6-L-3	Nc1nonc1C(=O)N1CC2CN(c3ccc(O)c(N4CC(=O)NS4(=O)=O)c3F)CC2C1	XTN-F6-099	C17H18N7O6FS	467.439		Small-scale ASMS	9.4	57687500	2138541	8802728	0.116	XTN-F6 All	5.64	21408	2129	2632	0.023
	XTN-F6-L-1	CC(C)(C)c1cc(C(=O)N2CC3CN(c4ccc(O)c(N5CC(=O)NS5(=O)=O)c4F)CC3C2)no1	XTN-F6-061	C22H26N5O6FS	507.544		Small-scale ASMS	7	14865275	1345	2176676	0.15	XTN-F6 All	7	659555	78576	92520	0.02
	XTN-F6-L-14	CC1CC1C(=O)N1CC2CN(c3ccc(O)c(N4CC(=O)NS4(=O)=O)c3F)CC2C1	XTN-F6-106	C19H23N4O5FS	438.481		Small-scale ASMS	5.27	90687	7780	8121	0.004	XTN-F6 All	5.27	36750	3477	4120	0.017
	XTN-F6-L-13	CC1(C(=O)N2CC3CN(c4ccc(O)c(N5CC(=O)NS5(=O)=O)c4F)CC3C2)CC1	XTN-F6-103	C19H23N4O5FS	438.481		Small-scale ASMS	5.25	2195	283	290	0.003	XTN-F6 All	5.25	36750	3477	4120	0.017
	XTN-F6-L-5	O=C1CN(c2c(O)ccc(N3CC4CN(C(=O)c5csc6ccccc56)CC4C3)c2F)S(=O)(=O)N1	XTN-F6-039	C23H21N4O5FS2	516.576		Small-scale ASMS	6.68	191926	0	27330	0.142	XTN-F6 All	6.68	69459	5722	6748	0.015
	XTN-F6-L-8	CN1CCC(C(=O)N2CC3CN(c4ccc(O)c(N5CC(=O)NS5(=O)=O)c4F)CC3C2)C1=O	XTN-F6-011	C20H24N5O6FS	481.506		Small-scale ASMS	4.15	173724	17228	16061	-0.007	XTN-F6 All	4.15	57354	5551	6394	0.015
	XTN-F6-L-15	O=C1CN(c2c(O)ccc(N3CC4CN(C(=O)c5cncs5)CC4C3)c2F)S(=O)(=O)N1	XTN-F6-083	C18H18N5O5FS2	467.504		Small-scale ASMS	5.01	29907	2049	2362	0.01	XTN-F6 All	5.01	27586	2130	2487	0.013
	XTN-F6-L-7	O=C1CN(c2c(O)ccc(N3CC4CN(C(=O)C5CC6(CCC6)C5)CC4C3)c2F)S(=O)(=O)N1	XTN-F6-114	C22H27N4O5FS	478.546		Small-scale ASMS	6.8	45777	2104	2649	0.012	XTN-F6 All	6.8	22121	1582	1838	0.012
	XTN-F6-L-9	COc1ccc2[nH]c(C(=O)N3CC4CN(c5ccc(O)c(N6CC(=O)NS6(=O)=O)c5F)CC4C3)cc2c1	XTN-F6-034	C24H24N5O6FS	529.55		Small-scale ASMS	6.69	487	0	0	0	XTN-F6 All	6.69	1135	100	114	0.012
	XTN-F6-L-9	O=C1CN(c2c(O)ccc(N3CC4CN(C(=O)c5c[nH]nn5)CC4C3)c2F)S(=O)(=O)N1	XTN-F6-070	C17H18N7O5FS	451.44		Small-scale ASMS	4.32	18117	1356	1290	-0.004	XTN-F6 All	4.32	7978	614	704	0.011
	XTN-F6-L-3	Cn1cc(C(=O)N2CC3CN(c4ccc(O)c(N5CC(=O)NS5(=O)=O)c4F)CC3C2)c(C(F)(F)F)n1	XTN-F6-094	C20H20N6O5F4S	532.476		Small-scale ASMS	9.37	26224448	703763	3229339	0.1	XTN-F6 All	5.71	77839	8073	9118	0.01
	XTN-F6-L-2	Cc1nc(C(=O)N2CC3CN(c4ccc(O)c(N5CC(=O)NS5(=O)=O)c4F)CC3C2)c(C)o1	XTN-F6-090	C20H22N5O6FS	479.49		Small-scale ASMS	8.78	38846996	7209938	6609347	-0.015	XTN-F6 All	5.34	22264	1582	1810	0.01
	XTN-F6-L-8	CC1(C(=O)N2CC3CN(c4ccc(O)c(N5CC(=O)NS5(=O)=O)c4F)CC3C2)CCC1	XTN-F6-002	C20H25N4O5FS	452.508		Small-scale ASMS	5.82	3280	427	256	-0.052	XTN-F6 All	5.84	3226	204	236	0.01
	XTN-F6-L-13	O=C1CN(c2c(O)ccc(N3CC4CN(C(=O)c5cc6c(F)cc(F)cc6[nH]5)CC4C3)c2F)S(=O)(=O)N1	XTN-F6-028	C23H20N5O5F3S	535.504		Small-scale ASMS	7.1	70227	2377	5205	0.04	XTN-F6 All	7.1	10533	678	762	0.008
	XTN-F6-L-11	O=C1CN(c2c(O)ccc(N3CC4CN(C(=O)c5cc6cc(F)c(F)cc6[nH]5)CC4C3)c2F)S(=O)(=O)N1	XTN-F6-026	C23H20N5O5F3S	535.504		Small-scale ASMS	7.11	2525	177	235	0.023	XTN-F6 All	7.12	10533	678	762	0.008
	XTN-F6-L-1	Cc1nc(C(=O)N2CC3CN(c4ccc(O)c(N5CC(=O)NS5(=O)=O)c4F)CC3C2)cs1	XTN-F6-089	C19H20N5O5FS2	481.531		Small-scale ASMS	8.76	14480100	0	1876392	0.13	XTN-F6 All	5.04	21110	1508	1648	0.007
	XTN-F6-L-18	Cc1ncc(C(=O)N2CC3CN(c4ccc(O)c(N5CC(=O)NS5(=O)=O)c4F)CC3C2)s1	XTN-F6-050	C19H20N5O5FS2	481.531		Small-scale ASMS	5.08	19871	1231	1470	0.012	XTN-F6 All	5.08	21110	1508	1648	0.007
	XTN-F6-L-8	O=C1CN(c2c(O)ccc(N3CC4CN(C(=O)C5(F)CC5)CC4C3)c2F)S(=O)(=O)N1	XTN-F6-102	C18H20N4O5F2S	442.444		Small-scale ASMS	5.58	5632	891	950	0.01	XTN-F6 All	5.57	1462	300	310	0.007
	XTN-F6-L-18	Cn1cnc(C(=O)N2CC3CN(c4ccc(O)c(N5CC(=O)NS5(=O)=O)c4F)CC3C2)c1	XTN-F6-067	C19H21N6O5FS	464.479		Small-scale ASMS	3.56	45278	2726	3180	0.01	XTN-F6 All	3.56	46885	3509	3831	0.007
	XTN-F6-L-12	O=C1CN(c2c(O)ccc(N3CC4CN(C(=O)c5n[nH]c6cccnc56)CC4C3)c2F)S(=O)(=O)N1	XTN-F6-036	C21H20N7O5FS	501.5		Small-scale ASMS	4.22	21606	1354	1368	0.001	XTN-F6 All	4.22	2600	198	217	0.007
	XTN-F6-L-10	O=C1CN(c2c(O)ccc(N3CC4CN(C(=O)C5CC(O)C5)CC4C3)c2F)S(=O)(=O)N1	XTN-F6-006	C19H23N4O6FS	454.48		Small-scale ASMS	4.23	61680	5223	0	-0.085	XTN-F6 All	4.23	12336	903	993	0.007
	XTN-F6-L-1	Cc1cc(C(=O)N2CC3CN(c4ccc(O)c(N5CC(=O)NS5(=O)=O)c4F)CC3C2)on1	XTN-F6-082	C19H20N5O6FS	465.463		Small-scale ASMS	5.4	13301475	13523	2361294	0.177	XTN-F6 All	5.4	10585	789	856	0.006
	XTN-F6-L-2	O=C1CN(c2c(O)ccc(N3CC4CN(C(=O)c5csc(-c6cccnc6)n5)CC4C3)c2F)S(=O)(=O)N1	XTN-F6-092	C23H21N6O5FS2	544.59		Small-scale ASMS	9.08	16364876	2619541	3017584	0.024	XTN-F6 All	5.63	7268	321	367	0.006
	XTN-F6-L-17	O=C1CN(c2c(O)ccc(N3CC4CN(C(=O)c5cnoc5)CC4C3)c2F)S(=O)(=O)N1	XTN-F6-060	C18H18N5O6FS	451.436		Small-scale ASMS	4.69	25648	2045	2401	0.014	XTN-F6 All	4.69	24641	2274	2434	0.006
	XTN-F6-L-15	O=C1CN(c2c(O)ccc(N3CC4CN(C(=O)c5cnco5)CC4C3)c2F)S(=O)(=O)N1	XTN-F6-079	C18H18N5O6FS	451.436		Small-scale ASMS	4.69	25648	2045	2401	0.014	XTN-F6 All	4.69	24641	2274	2434	0.006
	XTN-F6-L-2	Cc1nc(C(=O)N2CC3CN(c4ccc(O)c(N5CC(=O)NS5(=O)=O)c4F)CC3C2)co1	XTN-F6-091	C19H20N5O6FS	465.463		Small-scale ASMS	8.43	12727201	2974064	3086379	0.009	XTN-F6 All	5.01	9934	625	684	0.006
	XTN-F6-L-16	O=C1CN(c2c(O)ccc(N3CC4CN(C(=O)C5(O)CCCC5)CC4C3)c2F)S(=O)(=O)N1	XTN-F6-053	C20H25N4O6FS	468.507		Small-scale ASMS	4.85	22369	1368	1788	0.019	XTN-F6 All	4.85	20747	1739	1837	0.005
	XTN-F6-L-6	Cn1nc(C(=O)N2CC3CN(c4ccc(O)c(N5CC(=O)NS5(=O)=O)c4F)CC3C2)c2cccnc21	XTN-F6-108	C22H22N7O5FS	515.527		Small-scale ASMS	6.04	1603	248	269	0.013	XTN-F6 All	6.04	3959	247	268	0.005
	XTN-F6-L-7	O=C1CN(c2c(O)ccc(N3CC4CN(C(=O)c5ncc[nH]5)CC4C3)c2F)S(=O)(=O)N1	XTN-F6-069	C18H19N6O5FS	450.452		Small-scale ASMS	3.94	44999	2933	2858	-0.002	XTN-F6 All	3.94	14897	894	966	0.005
	XTN-F6-L-10	CC(=O)N1CCC[C@@H]1C(=O)N1CC2CN(c3ccc(O)c(N4CC(=O)NS4(=O)=O)c3F)CC2C1	XTN-F6-003	C21H26N5O6FS	495.533		Small-scale ASMS	4.33	59889	4571	4212	-0.006	XTN-F6 All	4.33	28535	1585	1740	0.005
	XTN-F6-L-17	Cc1ncsc1C(=O)N1CC2CN(c3ccc(O)c(N4CC(=O)NS4(=O)=O)c3F)CC2C1	XTN-F6-081	C19H20N5O5FS2	481.531		Small-scale ASMS	5.35	37412	2363	3027	0.018	XTN-F6 All	5.35	35819	3427	3445	0.001
	XTN-F6-L-5	Cc1nn(C)c(C)c1C(=O)N1CC2CN(c3ccc(O)c(N4CC(=O)NS4(=O)=O)c3F)CC2C1	XTN-F6-055	C21H25N6O5FS	492.533		Small-scale ASMS	4.94	1197	132	341	0.175	XTN-F6 All	4.94	616	0	0	0
	XTN-F6-L-6	Cc1nc(O)sc1C(=O)N1CC2CN(c3ccc(O)c(N4CC(=O)NS4(=O)=O)c3F)CC2C1	XTN-F6-054	C19H20N5O6FS2	497.53		Small-scale ASMS	4.82	747	82	186	0.139	XTN-F6 All	4.82	288	0	0	0
	XTN-F6-L-18	O=C1CN(c2c(O)ccc(N3CC4CN(C(=O)c5cc6sccc6[nH]5)CC4C3)c2F)S(=O)(=O)N1	XTN-F6-073	C21H20N5O5FS2	505.553		Small-scale ASMS	6.43	599	0	78	0.13	XTN-F6 All	6.43	390	0	0	0
	XTN-F6-L-15	O=C1CN(c2c(O)ccc(N3CC4CN(C(=O)C5CC5c5ccc(F)cc5)CC4C3)c2F)S(=O)(=O)N1	XTN-F6-008	C24H24N4O5F2S	518.542		Small-scale ASMS	6.57	1319	112	156	0.033	XTN-F6 All	0	0	0	0	0
	XTN-F6-L-17	Cc1nnsc1C(=O)N1CC2CN(c3ccc(O)c(N4CC(=O)NS4(=O)=O)c3F)CC2C1	XTN-F6-084	C18H19N6O5FS2	482.519		Small-scale ASMS	5.25	1790	391	431	0.022	XTN-F6 All	0	0	0	0	0
	XTN-F6-L-2	Cc1scnc1C(=O)N1CC2CN(c3ccc(O)c(N4CC(=O)NS4(=O)=O)c3F)CC2C1	XTN-F6-088	C19H20N5O5FS2	481.531		Small-scale ASMS	8.46	5360250	856147	958438	0.019	XTN-F6 All	0	0	0	0	0
	XTN-F6-L-12	O=C1CN(c2c(O)ccc(N3CC4CN(C(=O)C5C[C@H]6C=C[C@@H]5C6)CC4C3)c2F)S(=O)(=O)N1	XTN-F6-120	C22H25N4O5FS	476.53		Small-scale ASMS	6.42	2275	189	222	0.015	XTN-F6 All	6.42	470	0	0	0
	XTN-F6-L-6	CC(=O)N1C[C@H](O)C[C@H]1C(=O)N1CC2CN(c3ccc(O)c(N4CC(=O)NS4(=O)=O)c3F)CC2C1	XTN-F6-004	C21H26N5O7FS	511.532		Small-scale ASMS	3.59	412	72	77	0.012	XTN-F6 All	3.59	355	0	0	0
	XTN-F6-L-15	Cc1nocc1C(=O)N1CC2CN(c3ccc(O)c(N4CC(=O)NS4(=O)=O)c3F)CC2C1	XTN-F6-056	C19H20N5O6FS	465.463		Small-scale ASMS	5.11	21397	1402	1642	0.011	XTN-F6 All	5.11	18720	1587	1595	0
	XTN-F6-L-16	Cc1oncc1C(=O)N1CC2CN(c3ccc(O)c(N4CC(=O)NS4(=O)=O)c3F)CC2C1	XTN-F6-057	C19H20N5O6FS	465.463		Small-scale ASMS	5.11	21397	1402	1642	0.011	XTN-F6 All	5.11	18720	1587	1595	0
	XTN-F6-L-14	Nc1c(C(=O)N2CC3CN(c4ccc(O)c(N5CC(=O)NS5(=O)=O)c4F)CC3C2)sc2ncccc12	XTN-F6-097	C22H21N6O5FS2	532.579		Small-scale ASMS	6.09	7555	135	174	0.005	XTN-F6 All	6.09	1511	0	0	0
	XTN-F6-L-15	O=C1CN(c2c(O)ccc(N3CC4CN(C(=O)C5(c6ccccn6)CC5)CC4C3)c2F)S(=O)(=O)N1	XTN-F6-015	C23H24N5O5FS	501.54		Small-scale ASMS	4.7	6606	204	211	0.001	XTN-F6 All	0	0	0	0	0
	XTN-F6-L-16	O=C1CN(c2c(O)ccc(N3CC4CN(C(=O)C5(c6ccc(F)cc6)CC5)CC4C3)c2F)S(=O)(=O)N1	XTN-F6-019	C24H24N4O5F2S	518.542		Small-scale ASMS	5.44	9775	0	0	0	XTN-F6 All	5.44	152	0	0	0
	XTN-F6-L-14	Cc1ccc(C2(C(=O)N3CC4CN(c5ccc(O)c(N6CC(=O)NS6(=O)=O)c5F)CC4C3)CC2)cc1	XTN-F6-018	C25H27N4O5FS	514.579		Small-scale ASMS	7.1	21697	0	0	0	XTN-F6 All	0	0	0	0	0
	XTN-F6-L-1	O=C1CN(c2c(O)ccc(N3CC4CN(C(=O)c5nccs5)CC4C3)c2F)S(=O)(=O)N1	XTN-F6-080	C18H18N5O5FS2	467.504		Small-scale ASMS	5.56	1065670	0	0	0	XTN-F6 All	5.56	237	0	0	0
	XTN-F6-L-12	O=C1CN(c2c(O)ccc(N3CC4CN(C(=O)c5cc6cccnc6s5)CC4C3)c2F)S(=O)(=O)N1	XTN-F6-047	C22H20N5O5FS2	517.564		Small-scale ASMS	6.13	4649	372	349	-0.005	XTN-F6 All	0	0	0	0	0
	XTN-F6-L-14	O=C1CN(c2c(O)ccc(N3CC4CN(C(=O)c5cc(-c6ccc(F)cc6)[nH]n5)CC4C3)c2F)S(=O)(=O)N1	XTN-F6-074	C24H22N6O5F2S	544.54		Small-scale ASMS	6.69	3388	375	274	-0.03	XTN-F6 All	6.69	213	0	0	0
	XTN-F6-L-5	O=C1CN(c2c(O)ccc(N3CC4CN(C(=O)c5cnn6c5CCCC6)CC4C3)c2F)S(=O)(=O)N1	XTN-F6-010	C22H25N6O5FS	504.544		Small-scale ASMS	5.78	3489	353	480	0.036	XTN-F6 All	5.78	1873	112	110	-0.001
	XTN-F6-L-6	Cc1nc(C(F)(F)F)c(C(=O)N2CC3CN(c4ccc(O)c(N5CC(=O)NS5(=O)=O)c4F)CC3C2)s1	XTN-F6-116	C20H19N5O5F4S2	549.528		Small-scale ASMS	6.21	18589	1838	2324	0.026	XTN-F6 All	6.21	6029	409	389	-0.003
	XTN-F6-L-18	Nc1nsnc1C(=O)N1CC2CN(c3ccc(O)c(N4CC(=O)NS4(=O)=O)c3F)CC2C1	XTN-F6-098	C17H18N7O5FS2	483.507		Small-scale ASMS	5.65	7850	456	509	0.007	XTN-F6 All	5.65	6341	575	556	-0.003
	XTN-F6-L-7	CC12CC[C@@](C(=O)N3CC4CN(c5ccc(O)c(N6CC(=O)NS6(=O)=O)c5F)CC4C3)(OC1=O)C2(C)C	XTN-F6-117	C24H29N4O7FS	536.582		Small-scale ASMS	6.34	791	32	143	0.14	XTN-F6 All	6.34	1357	176	170	-0.004
	XTN-F6-L-10	COC(=O)C12CCC(C(=O)N3CC4CN(c5ccc(O)c(N6CC(=O)NS6(=O)=O)c5F)CC4C3)(CC1)C2	XTN-F6-012	C24H29N4O7FS	536.582		Small-scale ASMS	6.35	1936	0	184	0.095	XTN-F6 All	6.35	1357	176	170	-0.004
	XTN-F6-L-11	O=C1CN(c2c(O)ccc(N3CC4CN(C(=O)C5(c6ccc7c(c6)OC(F)(F)O7)CC5)CC4C3)c2F)S(=O)(=O)N1	XTN-F6-013	C25H23N4O7F3S	580.541		Small-scale ASMS	7.31	104323	4878	7074	0.021	XTN-F6 All	7.31	126	239	238	-0.008
	XTN-F6-L-17	Cc1cc(C)n2nc(C(=O)N3CC4CN(c5ccc(O)c(N6CC(=O)NS6(=O)=O)c5F)CC4C3)nc2n1	XTN-F6-068	C22H23N8O5FS	530.542		Small-scale ASMS	5.06	15687	1360	1963	0.038	XTN-F6 All	5.06	14027	1755	1626	-0.009
	XTN-F6-L-1	Cn1cc(C(=O)N2CC3CN(c4ccc(O)c(N5CC(=O)NS5(=O)=O)c4F)CC3C2)cn1	XTN-F6-062	C19H21N6O5FS	464.479		Small-scale ASMS	4.88	1922116	2485	6362	0.002	XTN-F6 All	4.88	2673	227	198	-0.011
	XTN-F6-L-12	Cc1cc(C(=O)N2CC3CN(c4ccc(O)c(N5CC(=O)NS5(=O)=O)c4F)CC3C2)n[nH]1	XTN-F6-059	C19H21N6O5FS	464.479		Small-scale ASMS	4.87	22870	1360	1360	0	XTN-F6 All	4.87	2673	227	198	-0.011
	XTN-F6-L-16	O=C1CN(c2c(O)ccc(N3CC4CN(C(=O)c5cc6cc(F)cc(F)c6[nH]5)CC4C3)c2F)S(=O)(=O)N1	XTN-F6-032	C23H20N5O5F3S	535.504		Small-scale ASMS	6.93	1603	132	162	0.019	XTN-F6 All	6.93	671	185	176	-0.013
	XTN-F6-L-16	O=C1CN(c2c(O)ccc(N3CC4CN(C(=O)c5cnn(Cc6ccccc6)c5)CC4C3)c2F)S(=O)(=O)N1	XTN-F6-064	C25H25N6O5FS	540.577		Small-scale ASMS	6.26	2650	190	220	0.011	XTN-F6 All	6.26	1781	216	185	-0.017
	XTN-F6-L-8	O=C1CN(c2c(O)ccc(N3CC4CN(C(=O)C5CC(=O)N(Cc6ccccc6)C5)CC4C3)c2F)S(=O)(=O)N1	XTN-F6-077	C26H28N5O6FS	557.604		Small-scale ASMS	5.84	5483	528	605	0.014	XTN-F6 All	5.84	2354	246	204	-0.018
	XTN-F6-L-15	O=C1CN(c2c(O)ccc(N3CC4CN(C(=O)C5(c6cccc(Cl)c6)CC5)CC4C3)c2F)S(=O)(=O)N1	XTN-F6-016	C24H24N4O5ClFS	534.997		Small-scale ASMS	6.84	1875	117	175	0.031	XTN-F6 All	6.84	864	157	133	-0.028
	XTN-F6-L-13	Cc1ccc2[nH]nc(C(=O)N3CC4CN(c5ccc(O)c(N6CC(=O)NS6(=O)=O)c5F)CC4C3)c2c1	XTN-F6-038	C23H23N6O5FS	514.539		Small-scale ASMS	6.15	2630	375	378	0.001	XTN-F6 All	6.15	2904	447	336	-0.038
	XTN-F6-L-8	O=C1CN(c2c(O)ccc(N3CC4CN(C(=O)C5(C(F)(F)F)CC5)CC4C3)c2F)S(=O)(=O)N1	XTN-F6-118	C19H20N4O5F4S	492.451		Small-scale ASMS	5.99	2431	409	410	0	XTN-F6 All	5.99	373	290	276	-0.038
	XTN-F6-L-3	Cn1cc(C(=O)N2CC3CN(c4ccc(O)c(N5CC(=O)NS5(=O)=O)c4F)CC3C2)c2cccnc21	XTN-F6-107	C23H23N6O5FS	514.539		Small-scale ASMS	9.11	14437894	451977	2103690	0.11	XTN-F6 All	6.26	2904	447	336	-0.04
	XTN-F6-L-18	Cc1nc(-c2ccccc2)sc1C(=O)N1CC2CN(c3ccc(O)c(N4CC(=O)NS4(=O)=O)c3F)CC2C1	XTN-F6-087	C25H24N5O5FS2	557.629		Small-scale ASMS	6.86	5603	416	634	0.039	XTN-F6 All	6.86	1690	507	407	-0.059
	XTN-F6-L-16	CC1CC(C(=O)N2CC3CN(c4ccc(O)c(N5CC(=O)NS5(=O)=O)c4F)CC3C2)C1	XTN-F6-005	C20H25N4O5FS	452.508		Small-scale ASMS	6.01	624	0	0	0	XTN-F6 All	6.01	706	151	82	-0.098
	XTN-F6-L-18	O=C1CN(c2c(O)ccc(N3CC4CN(C(=O)c5cc6cc(C(F)(F)F)cnc6[nH]5)CC4C3)c2F)S(=O)(=O)N1	XTN-F6-111	C23H20N6O5F4S	568.509		Small-scale ASMS	7.14	7235	778	1338	0.077	XTN-F6 All	7.14	1633	1010	798	-0.13
	XTN-F6-L-4	O=C1CN(c2c(O)ccc(N3CC4CN(C(=O)c5cnc(C(F)(F)F)s5)CC4C3)c2F)S(=O)(=O)N1	XTN-F6-113	C19H17N5O5F4S2	535.501		Small-scale ASMS	6.71	258774	29921	38220	0.032	XTN-F6 All	6.71	338	253	209	-0.13
	XTN-F6-L-11	Nc1ncc(C(=O)N2CC3CN(c4ccc(O)c(N5CC(=O)NS5(=O)=O)c4F)CC3C2)s1	XTN-F6-051	C18H19N6O5FS2	482.519		Small-scale ASMS	4.05	22994	1743	1652	-0.004	XTN-F6 All	4.05	1212	272	103	-0.139
	XTN-F6-L-10	O=C1CN(c2c(O)ccc(N3CC4CN(C(=O)C5(c6ccncc6)CC5)CC4C3)c2F)S(=O)(=O)N1	XTN-F6-014	C23H24N5O5FS	501.54		Small-scale ASMS	4.04	43852	3286	4669	0.032	XTN-F6 All	4.04	14127	4082	1929	-0.152
