# Supplementary material for: Evolving drug discovery using AI, automation, and ASMS through an integrated D-preMTA-MTA strategy for target-focused library exploration
Source: Research Square preprint supplement (doi:10.21203/rs.3.rs-3753964/v1), 2024-02-12
Supplement: Supplementary file 3 [file 6c4ee52abf22b26a72f9f0b5.xlsx]

## Sheet: Sheet1
SMILES_of_AI_molecules	SMILES_of_Fragments	SMILES_of_BBs	NAME_of_BBs	REACT	REAGENT	FRAME_ID
O=C1CN(c2c(O)ccc([C@H]3CO[C@]4(CC[C@H](CN[C@@H]5CCCNN5)CC4)C3)c2F)S(=O)(=O)N1	[C@H](C1)CO[C@]11CC[C@@H](CN[C@H]2NNCCC2)CC1					1
C[C@@]1(Cn2cccn2)C[C@@H]1[C@H](F)Cc1ccccc1NCC1(c2ccc(O)c(N3CC(=O)NS3(=O)=O)c2F)CC1	C1(CNc2c(C[C@H]([C@@H]3[C@](C)(Cn4nccc4)C3)F)cccc2)CC1					2
Cc1cc(C[C@H]2CCCC[C@H]2Oc2ccn[nH]2)n(C[C@H]2CCCOC2)c1-c1ccc(O)c(N2CC(=O)NS2(=O)=O)c1F	c1c(C)cc(C[C@@H](CCCC2)[C@@H]2Oc2ccn[nH]2)n1C[C@@H]1COCCC1
C[C@@H](NC[C@H]1CCCN1[C@@H]1CCCN(c2ccc(O)c(N3CC(=O)NS3(=O)=O)c2F)N1)[C@H](F)Cc1cccc(C(F)F)c1 C[C@@H](OCc1cccc(N2CCCC2)n1)[C@@]1(c2ccc(O)c(N3CC(=O)NS3(=O)=O)c2F)C[C@@H]1c1ccccc1 C[C@@H]1C[C@@H](Cn2cccn2)NN[C@@H]1N1CCC[C@H]1[C@@H]1CC[C@@H](c2ccc(O)c(N3CC(=O)NS3(=O)=O)c2F)O1 C[C@@H]1CC[C@H](n2ccc(-c3ccc(O)c(N4CC(=O)NS4(=O)=O)c3F)n2)[C@@H](OC(=O)Nc2ccccc2C#N)C1 C[C@H](C[C@@H]1C[C@@H](c2ccc(O)c(N3CC(=…	N(CCC1)NC1N1C(C)CCC1 C(CC)(C1)C1c1ccccc1 C(CC1)OC1C1NCCC1 c1nn(C2CCC(C)CC2)cc1 C(CC1CCC)CN1c1ccccc1 c(cc1)ccc1N(CCC1)C1C(C)C c1cccc(C2CC2)c1C#N C(CCCC1)CC1c1nocc1 c1nc(C(C2)C2N)c(C)n1C c1c(C)cc(C2NCCC2)cc1 c1cccc(C(C2)C2(C)O)c1 C(CC1)CN1c1nccc(C)c1 OC(C)(C1)C1c1ccc(C)cc1 c1cc(C(C2)C2C=O)no1 COc1cc(C2(C)CC2)ccc1 c(cc1)ccc1N1C(CC)CCC1 c1cccc(N(CCC2)C2C(C)(F)F)c1 C(CNC1)C1C(C1)C1S(=O)=O c(cc1)ccc1N1…	Nc1cc(F)c(C2CCNCC2)cc1	BB 1	Buchwald reaction	Amine	3
		Nc1nc(C2CNCC2)cs1	BB 12
		Nc1n[nH]c(C2CNCC2)c1	BB 130
		Nc1cc(C2CNC2)n[nH]1	BB 16
		C(CNC1)C1N1CCNCC1	BB 17
		Clc(ccc(C1NCCNC1)c1)c1Cl	BB 191
		Nc1cn(C2CNC2)nc1	BB 195
		Nc(cc1)cnc1N1CCNCC1	BB 2
		NC(CC1)CCN1C1CCNCC1	BB 202
		Nc(cc1)cc(C(F)(F)F)c1N1CCNCC1	BB 207
		Nc1ccc(C2CCNCC2)cc1	BB 208
		C1C(C2CNC2)NC1	BB 28
		Nc1cccc(C2NCCC2)c1	BB 29
		CC1(C)C(C2CCNCC2)NC1	BB 46
		C1NCC(c2cccs2)NC1	BB 47
		C1NCC1C1NCCC1	BB 48
		C1NCC1N1CCNCC1	BB 49
		NCC1(CCNCC1)c1ccccc1	BB 55
		NC(CNC1)C1c(cc1)ccc1F	BB 56
		CC(C1)CNCC1c(cc1)cc(N)c1Cl	BB 6
		CC(C1)NC(C)CN1c(nc1)nc(N)c1Br	BB 9
		NCC(Nc(cc1)ccc1-n1nccc1)=O	BB 96
Cc1ccc(NC[C@H]2OC3(CCC3)CN2c2ccc(-c3ccc(O)c(N4CC(=O)NS4(=O)=O)c3F)cc2)cn1	c(cc1)ccc1N1[C@@H](CNc2cnc(C)cc2)OC2(CCC2)C1					4
O=C1CN(c2c(O)ccc(-c3ccc(N4CC5(CCC5)C[C@H]4C(=O)Nc4ccccc4F)nc3)c2F)S(=O)(=O)N1	c(cc1)cnc1N(CC1(CCC1)C1)[C@@H]1C(Nc(cccc1)c1F)=O
O=C1CN(c2c(O)ccc(-c3cccc(N4CC5(CCC5)[C@@H]4C(=O)Nc4cnccc4F)c3)c2F)S(=O)(=O)N1	c1cccc(N(CC23CCC3)[C@H]2C(Nc(cncc2)c2F)=O)c1
O=C1CN(c2c(O)ccc(Cc3scnc3N[C@@H]3CC[C@@H]4Cc5ncccc5[C@H]3C4)c2F)S(=O)(=O)N1	Cc1c(N[C@H](CC[C@@H](C2)C3)[C@H]2c2c3nccc2)ncs1					5
C[C@@H](Cc1ccc(O)c(N2CC(=O)NS2(=O)=O)c1F)Cc1cc2n(c1C(=O)N[C@@H]1CCOc3ccccc31)CCC2	C[C@H](C)Cc1c(C(N[C@H]2c(cccc3)c3OCC2)=O)n(CCC2)c2c1					6
C[C@@H]1[C@H]2CCC[C@@H](S(=O)(=O)Nc3ccccc3F)[C@H]2CN1c1ccc(O)c(N2CC(=O)NS2(=O)=O)c1F C[C@@H]1N[C@H]2C[C@@](C#N)(COc3ccc(-c4ccc(O)c(N5CC(=O)NS5(=O)=O)c4F)cc3)CCC[C@H]2N1 C[C@@H]1Nc2ccc(CCc3ccccn3)cc2C[C@@H]1c1ccc(O)c(N2CC(=O)NS2(=O)=O)c1F Cc1c(-c2ccc(O)c(N3CC(=O)NS3(=O)=O)c2F)cnc2c1CCCC[C@@H]2CNc1ccsn1 Cc1ccc(N[C@@H]2Cc3cc(-c4ccc(O)c(N5CC(=O)NS5(=O)=O)c4F)ccc3N(C)C(C)(C)C2)cc1 Cc1ccc(NC(=O)C[C@H]2…	N(C1)[C@H](C)[C@@H](CCC2)[C@H]1[C@@H]2S(Nc(cccc1)c1F)(=O)=O c(cc1)ccc1OC[C@@]1(C[C@@H]2N[C@@H](C)N[C@@H]2CCC1)C#N [C@@H](C1)[C@H](C)Nc2c1cc(CCc1ncccc1)cc2 c1cnc([C@@H](CNc2nscc2)CCCC2)c2c1C c(cc1)cc(C2)c1N(C)C(C)(C)C[C@@H]2Nc1ccc(C)cc1 c(cc1)cc2c1O[C@@H](CC(Nc1ncc(C)cc1)=O)CC2 [C@H](C[C@H]1NC(CCc2nocc2)=O)Cc2c1cc(C)cc2 [C@H](C[C@H]1NC(c2c(C)cccc2)=O)Cc2c1ncn2C c(cc1)ccc1OC[C@H](CCC[C@@H]1C2)N1[C@…	Cc(cc1C)cc2c1NCCCC2Nc1nn(C)nn1	BB 11	Buchwald reaction	Amine	7
CCCS(=O)(=O)Nc1ccc(-c2ccc(O)c(N3CC(=O)NS3(=O)=O)c2F)c([C@]2(C)Cc3ccccc3N2)c1	c(cc1)c([C@](C)(C2)Nc3c2cccc3)cc1NS(CCC)(=O)=O					8
C[C@]1([C@H]2[C@H](c3cccc(C(N)=O)c3)[C@H]2c2ccc(O)c(N3CC(=O)NS3(=O)=O)c2F)CN(c2ccccc2)CN1	[C@@H]([C@H]1[C@@](C)(C2)NCN2c2ccccc2)[C@H]1c1cccc(C(N)=O)c1					9
CC[C@]1(c2ccc(O)c(N3CC(=O)NS3(=O)=O)c2F)CCN(c2cccc([C@@]3(F)C[C@H]3c3cc[nH]n3)c2)N1	[C@@](CC)(CC1)NN1c1cccc([C@@](C2)([C@@H]2c2n[nH]cc2)F)c1
O=C1CN(c2c(O)ccc([C@@H]3[C@@H](c4cccc(F)c4)[C@@H]3[C@H]3CN[C@@H](N4CCCC4)N3)c2F)S(=O)(=O)N1	[C@@H]([C@H]1[C@@H](CN2)N[C@@H]2N2CCCC2)[C@H]1c1cccc(F)c1
O=C1CN(c2c(O)ccc(-c3ccc(N4CCC[C@H]4[C@@H]4C[C@H]4c4cc(O)n[nH]4)cc3)c2F)S(=O)(=O)N1	c(cc1)ccc1N(CCC1)[C@@H]1[C@H](C1)[C@@H]1c1cc(O)n[nH]1
C[C@H]1[C@H]2[C@H](O)CCN(c3cncc(-c4ccc(O)c(N5CC(=O)NS5(=O)=O)c4F)c3)[C@H]2N[C@@H]1N1CCCC1	c1cc(N(CC[C@H]([C@@H]2[C@@H]3C)O)[C@H]2N[C@@H]3N2CCCC2)cnc1					10
Cc1cc(N2CCC[C@@H]2C(=O)NC[C@H]2C[C@@H]2OC2CC2)cc(-c2ccc(O)c(N3CC(=O)NS3(=O)=O)c2F)c1C1CC1	c1cc(N(CCC2)[C@H]2C(NC[C@@H](C2)[C@H]2OC2CC2)=O)cc(C)c1C1CC1					11
O=C1CN(c2c(O)ccc([C@@H]3[C@@H](CN[C@@H]4C[C@H]4[C@@H]4CCCN4c4ccccc4)[C@H]3Nc3ccccc3F)c2F)S(=O)(=O)N1	[C@H]([C@H]1CN[C@H](C2)[C@@H]2[C@H](CCC2)N2c2ccccc2)[C@@H]1Nc(cccc1)c1F
CC1(C)C=C(CCN[C@H]2C[C@@H](c3ccc(O)c(N4CC(=O)NS4(=O)=O)c3F)CC23CN(c2ccccc2)C3)NC1 COc1ccc2c(C(=O)NC3CC4(C3)CN(c3ccc(O)c(N5CC(=O)NS5(=O)=O)c3F)C4)c[nH]c2c1 O=C1CN(c2c(O)ccc([C@H]3C[C@@H](NCc4ccn[nH]4)[C@]34CC[C@@H](n3cccn3)C4)c2F)S(=O)(=O)N1	C1CC2(CNC2)CC1 N1CC(C2)(CC2N)C1 C(CC1)C11CCCC1	CC1NCCC2(CNC2)C1	BB 10	Buchwald reaction	Amine	12
		NC(C1)CC1(C1)CNC1=O	BB 131
		C1NCC11CNCC1	BB 135
		FC1(C2(CNC2)CCNC1)F	BB 14
		NC(CC(C1)(F)F)C11CCNCC1	BB 148
		OC1C2(CNC2)CCNC1	BB 163
		O=C1NCC11CNCCC1	BB 167
		OC1C2(CCNCC2)CCNC1	BB 170
		FC1(C2(CNC2)CNC1)F	BB 173
		O=C1NCCC11CNCCC1	BB 178
		FC1(C2(CNC2)NC1)F	BB 184
		C(COC1)C11NCCNC1	BB 186
		O=C1NCCCC11CNCC1	BB 187
		CC1NCC11CNC1	BB 193
		C1C2(CNCC2)NC1	BB 197
		C1NCC11CNC1	BB 199
		O=C1NCC11CCNCC1	BB 201
		C1NCC11CCNCC1	BB 21
		FC1(CNCC2(CNCC2)C1)F	BB 25
		C1NCC11NCCC1	BB 26
		FCC1C2(CNC2)CNC1	BB 27
		O=C1NCC11CNCC1	BB 34
		FC1(CNCC2(CNC2)C1)F	BB 37
		NC1CC2(CNCC2)OCC1	BB 52
		N[C@H](C1)C[C@]11NCCC1	BB 61
		NC1CCC2(CNC2)CC1	BB 68
		O=C1NCC11CCNCC1	BB 7
		C1NCC11CNCC1	BB 73
		NC(CC1)C11CCNCC1	BB 79
		NC1C2(CC2)CNCC1	BB 83
		C1NCC11CNCCC1	BB 86
		NC(C1)CC11CNC1	BB 98
Cc1c(-c2ccc(O)c(N3CC(=O)NS3(=O)=O)c2F)ccc(=O)n1CCc1cccc(C(N)=O)c1 Cc1cc(-c2ccc(O)c(N3CC(=O)NS3(=O)=O)c2F)cc(=O)n1CCc1cccc(C(N)=O)c1	C(C=C1)=C(C)NC1=O C(C=C(C)N1)=CC1=O	NCC1=NN=C(N)NC1=O	BB 114	Buchwald reaction	Amine	13
		CNC(C1)CNC1=O	BB 145
		CC1NCCNC1=O	BB 160
		CC(CN1)NC(C)C1=O	BB 174
		NC(CN1)C1=O	BB 78
N#Cc1cnc2c(c1)[C@]1(CCN2c2cccnc2)C[C@@H](c2ccc(O)c(N3CC(=O)NS3(=O)=O)c2F)CN1	[C@H](C1)CN[C@]1(CC1)c2cc(C#N)cnc2N1c1cnccc1					14
O=C1CN(c2c(O)ccc(-c3cc4c(cc3F)[C@]3(CCCN3)CCN4c3ccn[nH]3)c2F)S(=O)(=O)N1	c(cc(c([C@]1(CC2)NCCC1)c1)N2c2ccn[nH]2)c1F
O=C1CN(c2c(O)ccc(CN3CC4(CC[C@@H](c5cc(O)n[nH]5)c5ccccc54)C3)c2F)S(=O)(=O)N1	CN(C1)CC1(CC[C@H]1c2cc(O)n[nH]2)c2c1cccc2
O=C1CN(c2c(O)ccc(N[C@H]3CO[C@@]34CCCN([C@H]3CC[C@H](N5CCCCC5)NN3)C4)c2F)S(=O)(=O)N1	N[C@@H]1[C@@](CCC2)(CN2[C@@H](CC2)NN[C@H]2N2CCCCC2)OC1					15
Cc1ccccc1-c1cc2c(c(N3CC(NS(=O)(=O)Cc4ccc(O)c(N5CC(=O)NS5(=O)=O)c4F)C3)n1)CCC2	CS(NC(C1)CN1c1nc(-c2c(C)cccc2)cc2c1CCC2)(=O)=O					16
Cc1ccc(-n2cc(-c3ccc(O)c(N4CC(=O)NS4(=O)=O)c3F)cn2)c([C@@H](Nc2cccc(C(F)F)n2)C2CC2)c1	c1cn(-c2c([C@H](C3CC3)Nc3cccc(C(F)F)n3)cc(C)cc2)nc1					17
O=C1CN(c2c(O)ccc(-c3ccc(C[C@@H]4CCOc5ccccc5N4)c(Cc4ccon4)c3)c2F)S(=O)(=O)N1	c1cc(Cc2nocc2)c(C[C@H]2Nc(cccc3)c3OCC2)cc1					18
Cc1cccc(=O)n1[C@@H]1CCCCC[C@H]1Nc1cccc(Cc2ccc(O)c(N3CC(=O)NS3(=O)=O)c2F)c1 CCN1C[C@H](c2ccccc2NC[C@H]2C[C@@H](c3ccc(O)c(N4CC(=O)NS4(=O)=O)c3F)C2)CC1=O N#Cc1ccc(Oc2ccc(-c3ccc(O)c(N4CC(=O)NS4(=O)=O)c3F)cc2)cc1[C@H]1COCC(=O)N1	Cc1cccc(N[C@H](CCCCC2)[C@@H]2N(C(C)=CC=C2)C2=O)c1 [C@H]1C[C@@H](CNc2c([C@H](C3)CN(CC)C3=O)cccc2)C1 c(cc1)ccc1Oc(cc1)cc([C@@H](COC2)NC2=O)c1C#N	NC(CC1=O)CN1c(cc1)ccc1S(N1CCNCC1)(=O)=O	BB 36	Buchwald reaction	Amine	19
Cc1cc(-c2ccc(O)c(N3CC(=O)NS3(=O)=O)c2F)ccc1NC(=O)[C@@H]1C[C@@H]1c1ccn([C@@H]2CCC(F)(F)C2)n1	c(cc1)cc(C)c1NC([C@H](C1)[C@H]1c1nn([C@H](CC2)CC2(F)F)cc1)=O					20
CC1CCN([C@@H]2C[C@H]([C@H]3CC[C@@H]3NC3CCCC3)N(c3ccc(O)c(N4CC(=O)NS4(=O)=O)c3F)N2)CC1	N([C@H](C1)[C@@H](CC2)[C@H]2NC2CCCC2)N[C@@H]1N1CCC(C)CC1
Cc1nc(-c2ccc(O)c(N3CC(=O)NS3(=O)=O)c2F)c(CN[C@H]2C[C@H]2[C@H]2CCCN2c2ccccc2)s1	c1c(CN[C@@H](C2)[C@@H]2[C@@H](CCC2)N2c2ccccc2)sc(C)n1
Cc1nc(CN[C@@H]2C[C@H]2[C@@H]2CCCN2c2ccccc2)c(-c2ccc(O)c(N3CC(=O)NS3(=O)=O)c2F)[nH]1	c1c(CN[C@H](C2)[C@@H]2[C@H](CCC2)N2c2ccccc2)nc(C)[nH]1
Cc1nccc(Nc2ccc(O)c(N3CC(=O)NS3(=O)=O)c2F)c1CN[C@H]1C[C@@H]1[C@H]1CCCN1c1ccccc1	Nc1c(CN[C@@H](C2)[C@H]2[C@@H](CCC2)N2c2ccccc2)c(C)ncc1
CN(Cc1ccc(O)c(N2CC(=O)NS2(=O)=O)c1F)c1ccc([C@@H]2C[C@H]2[C@H]2CCCNN2)n1CC1CC1	CN(C)c1ccc([C@H](C2)[C@@H]2[C@@H]2NNCCC2)n1CC1CC1
Cn1cc(F)c([C@@H]2C[C@H]2[C@@]2(C)CCN2C(=O)c2cc(-c3ccc(O)c(N4CC(=O)NS4(=O)=O)c3F)n[nH]2)c1	c1n[nH]c(C(N(CC2)[C@@]2(C)[C@H](C2)[C@@H]2c2cn(C)cc2F)=O)c1
N#Cc1ccc([C@H]2CCCN2c2cc(-c3ccc(O)c(N4CC(=O)NS4(=O)=O)c3F)ccn2)nc1NC1CC1	c1cc(N(CCC2)[C@H]2c(cc2)nc(NC3CC3)c2C#N)ncc1
N#Cc1ccccc1NC(=O)C[C@@]1(F)C[C@@H]1[C@@H]1C[C@H](c2ccc(O)c(N3CC(=O)NS3(=O)=O)c2F)CN1c1cccnc1	[C@@H](C[C@H]1[C@@H](C2)[C@]2(CC(Nc(cccc2)c2C#N)=O)F)CN1c1cnccc1
N#Cc1ccccc1NC(=O)C[C@@]1(F)C[C@@H]1[C@H]1CCCN1c1ccc(-c2ccc(O)c(N3CC(=O)NS3(=O)=O)c2F)nc1	c(cc1)ncc1N(CCC1)[C@H]1[C@@H](C1)[C@]1(CC(Nc(cccc1)c1C#N)=O)F
O=C(C[C@H]1CCCN1c1cc([C@H]2C[C@@H]2c2ccc(O)c(N3CC(=O)NS3(=O)=O)c2F)on1)Nc1ccccc1	[C@@H](C1)[C@H]1c1cc(N2[C@@H](CC(Nc3ccccc3)=O)CCC2)no1
O=C1CN(c2c(O)ccc([C@@H]3CCN(c4cccc([C@@H]5CC[C@H]5Nc5ccccc5[C@@H](F)CF)n4)C3)c2F)S(=O)(=O)N1	[C@H](CC1)CN1c1cccc([C@H](CC2)[C@@H]2Nc2c([C@H](CF)F)cccc2)n1
O=C1CN(c2c(O)ccc([C@@H]3CN(c4cccc(S(=O)(=O)Nc5ccccn5)c4)[C@H]3C3CC3)c2F)S(=O)(=O)N1	[C@H](C1)[C@H](C2CC2)N1c1cccc(S(Nc2ncccc2)(=O)=O)c1
O=C1CN(c2c(O)ccc([C@H]3[C@H](OCc4cccc(C(F)(F)F)n4)[C@@H]3c3ccc(N4CCCC4)[nH]3)c2F)S(=O)(=O)N1	[C@H]([C@H]1c([nH]2)ccc2N2CCCC2)[C@@H]1OCc1cccc(C(F)(F)F)n1
O=C1CN(c2c(O)ccc(-c3cc([C@H]4C[C@@H]4OCc4cccc(C(F)(F)F)n4)[nH]c3N3CCCC3)c2F)S(=O)(=O)N1	c(cc([C@@H](C1)[C@H]1OCc1cccc(C(F)(F)F)n1)[nH]1)c1N1CCCC1
O=C1CN(c2c(O)ccc(-c3ccc(NC(=O)[C@H]4C[C@H]4c4csc(N5CCCC5)n4)c(F)c3)c2F)S(=O)(=O)N1	c(cc1)cc(F)c1NC([C@@H](C1)[C@@H]1c1csc(N2CCCC2)n1)=O
O=C1CN(c2c(O)ccc(-c3nc([C@H]4C[C@H]4[C@H](F)CNc4cccc(C(F)F)c4)c(N4CCCC4)s3)c2F)S(=O)(=O)N1	c1nc([C@@H](C2)[C@@H]2[C@@H](CNc2cc(C(F)F)ccc2)F)c(N2CCCC2)s1
O=C1CN(c2c(O)ccc(Cc3ccccc3NC(=O)[C@H]3C[C@H]3c3cccc(N4CCCC4)n3)c2F)S(=O)(=O)N1	Cc(cccc1)c1NC([C@@H](C1)[C@@H]1c1nc(N2CCCC2)ccc1)=O
O=C1CN(c2c(O)ccc([C@H]3C[C@@H]3c3cc(S(=O)(=O)Nc4ccccn4)cc(C4CC4)n3)c2F)S(=O)(=O)N1	[C@@H](C1)[C@H]1c1nc(C2CC2)cc(S(Nc2ncccc2)(=O)=O)c1					21
O=C1CN(c2c(O)ccc([C@H]3CC[C@H](CN[C@@]4(c5ccccc5)C[C@H]4c4cc[nH]n4)O3)c2F)S(=O)(=O)N1	[C@@H]1O[C@@H](CN[C@@](C2)([C@@H]2c2n[nH]cc2)c2ccccc2)CC1
Cc1ccc(NCc2ccc(F)c(-c3ccc(O)c(N4CC(=O)NS4(=O)=O)c3F)c2)c(=O)n1C[C@H]1CCCO1	c(cc(CNC1=CC=C(C)N(C[C@@H]2OCCC2)C1=O)cc1)c1F					22
Cc1oc(Cn2cccn2)cc(=O)c1Cc1ccc(-c2ccc(O)c(N3CC(=O)NS3(=O)=O)c2F)c(F)c1	c(ccc(CC1=C(C)OC(Cn2nccc2)=CC1=O)c1)c1F
Cc1cc(C(=O)[C@H](Cc2ccc(-c3ccc(O)c(N4CC(=O)NS4(=O)=O)c3F)cc2C#N)C2CC2)on1	c1cc(C#N)c(C[C@H](C2CC2)C(c2cc(C)no2)=O)cc1					23
Cc1cncnc1NC(=O)[C@@H](Nc1ccc(-c2ccc(O)c(N3CC(=O)NS3(=O)=O)c2F)cc1)C1CC1	c(cc1)ccc1N[C@@H](C1CC1)C(Nc1ncncc1C)=O
O=C1CN(c2c(O)ccc([C@H]3CC[C@H](/C(=C\NCc4ccccc4)C[C@H]4CCCO4)CC3)c2F)S(=O)(=O)N1	[C@H](CC1)CC[C@@H]1/C(/C[C@@H]1OCCC1)=C\NCc1ccccc1
O=C1CN(c2c(O)ccc(C3(C[C@H](Nc4ccccc4C(F)(F)F)c4ccn[nH]4)CC3)c2F)S(=O)(=O)N1	C1(C[C@@H](c2ccn[nH]2)Nc2c(C(F)(F)F)cccc2)CC1
O=C1CN(c2c(O)ccc(-c3ccc(C[C@@H](C(=O)c4cn[nH]c4)C4CC4)c(F)c3)c2F)S(=O)(=O)N1	c1cc(F)c(C[C@H](C2CC2)C(c2c[nH]nc2)=O)cc1
C[C@@H](Nc1cc(F)cc(-c2ccc(O)c(N3CC(=O)NS3(=O)=O)c2F)c1)c1ccccc1NS(=O)(=O)C1CC1 C[C@@H](Nc1cccc(F)c1)c1ccccc1NS(=O)(=O)C1(c2ccc(O)c(N3CC(=O)NS3(=O)=O)c2F)CC1 C[C@@H]1[C@@H](c2ccc(O)c(N3CC(=O)NS3(=O)=O)c2F)C[C@H]1Oc1cccc(S(=O)(=O)Nc2ccccn2)c1 C[C@]1(COc2ccccc2)C[C@]1(F)CC(=O)Nc1cncc(-c2ccc(O)c(N3CC(=O)NS3(=O)=O)c2F)c1 C[C@H](Nc1ccc(C#N)c(NS(=O)(=O)[C@H]2C[C@@H]2c2ccc(O)c(N3CC(=O)NS3(=O)=O)c2F)c1)c1…	c1cc(N[C@H](C)c(cccc2)c2NS(C2CC2)(=O)=O)cc(F)c1 C1(CC1)S(Nc1c([C@@H](C)Nc2cc(F)ccc2)cccc1)(=O)=O [C@@H](C1)[C@@H](C)[C@@H]1Oc1cccc(S(Nc2ncccc2)(=O)=O)c1 c1cc(NC(C[C@@]2([C@@](C)(COc3ccccc3)C2)F)=O)cnc1 [C@@H](C1)[C@H]1S(Nc(cc(cc1)N[C@@H](C)c2ccccc2)c1C#N)(=O)=O c1c([C@H](C)Nc(cc2)cc(NS(C3CC3)(=O)=O)c2C#N)cccc1 [C@@H](CCCC1)N1S(Cc(cccc1)c1N[C@@H](C)c1ccccc1)(=O)=O c1cccc([C@H](C)Nc2c(CS(N3CCCCC3)(…	C(c1ccccc1)NC(CCCC1)C1NCc1ccccc1	BB 200	Buchwald reaction	Amine	24
		C(C1)C1Nc1cc(NC2CNCC2)ncn1	BB 99
O=C1CN(c2c(O)ccc(-c3cc([C@@H]4C[C@H]5CC[C@@H](C4)N5C4=CCC[C@@H]5[C@H]6CCCC[C@H]6N[C@H]45)ns3)c2F)S(=O)(=O)N1	c1cc([C@H](C[C@H]2CC3)C[C@H]3N2C2=CCC[C@H]3[C@@H]2N[C@H]2[C@@H]3CCCC2)ns1					25
NC(=O)c1ccccc1N1[C@@H]2CC[C@H]1C[C@H](Nc1cccc(-c3ccc(O)c(N4CC(=O)NS4(=O)=O)c3F)c1)C2 O=C1CN(c2c(O)ccc(-c3cccc(C[C@@H]4CC[C@H]5C[C@@H](C4)NN5)c3)c2F)S(=O)(=O)N1	c1cccc(NC2CC(CC3)NC3C2)c1 c1cccc(C[C@H]2C[C@H](C3)NN[C@H]3CC2)c1	Nc(cc(cc1)Br)c1NC(C1NC2CC1CC2)=O	BB 129	Buchwald reaction	Amine	26
CC(C)(CS(=O)(=O)NCc1cccc(C(N)=O)c1)c1ccc(O)c(N2CC(=O)NS2(=O)=O)c1F CC(C)[C@H](c1ccc(O)c(N2CC(=O)NS2(=O)=O)c1F)S(=O)(=O)NCc1cccc(C(N)=O)c1 O=C1CN(c2c(O)ccc(CCS(=O)(=O)Nc3cccc([C@H]4COCCN4)c3)c2F)S(=O)(=O)N1	C(C)(C)CS(=O)=O C(C(C)C)S(=O)=O CCS(=O)=O	CNCCCN	BB 121	Buchwald reaction	Amine	27
		CC(C)NCC(C)(C)N	BB 140
		CN(C)CCNCCN	BB 161
		CC(C)(C)NCCNC(C)(C)C	BB 22
		NCCNCCS(O)(=O)=O	BB 77
		CC(C)NCCCN	BB 80
		CO[Si](CCCNCCN)(OC)OC	BB 93
Cn1cc([C@H]2C[C@]2(C)[C@H]2CCCN2c2ccc(-c3ccc(O)c(N4CC(=O)NS4(=O)=O)c3F)cc2)[nH]c1=O	c(cc1)ccc1N(CCC1)[C@H]1[C@@](C)(C1)[C@H]1C(N1)=CN(C)C1=O					28
O=C1CN(c2c(O)ccc([C@H]3[C@H](CNc4cccc(C5CCC5)n4)C[C@@]34CCN4c3ccccc3)c2F)S(=O)(=O)N1	[C@@H]([C@H](CNc1nc(C2CCC2)ccc1)C1)[C@@]1(CC1)N1c1ccccc1					29
C[C@H]1CC(=O)[C@@H](CN[C@H]2[C@H](c3ccc(O)c(N4CC(=O)NS4(=O)=O)c3F)[C@H]2[C@H]2CCCN2c2ccccc2)N(C)N1	C(C1)C1C(CCC1)N1c1ccccc1					30
C[C@H]1NN(C)C(=O)[C@H]1CN[C@@H]1C[C@H]1[C@@H]1CCN1c1ccccc1-c1ccc(O)c(N2CC(=O)NS2(=O)=O)c1F	c(cccc1)c1N(CC1)C1C1CC1
CC(C)CNc1nccc([C@H]2CCCN2c2cccc(-c3ccc(O)c(N4CC(=O)NS4(=O)=O)c3F)c2)n1	c1cccc(N(CCC2)[C@H]2c2ccnc(NCC(C)C)n2)c1
Cc1ccc([C@@H]2CC(C)(C)CN2c2cccc(F)c2)c(NC(=O)Cc2ccc(O)c(N3CC(=O)NS3(=O)=O)c2F)c1	CC(Nc1c([C@H](CC(C)(C)C2)N2c2cccc(F)c2)ccc(C)c1)=O
Cc1nn([C@@]2(C(F)F)C[C@@H]2c2cccc(C(N)=O)c2)cc1-c1ccc(O)c(N2CC(=O)NS2(=O)=O)c1F	c1cn([C@](C2)(C(F)F)[C@H]2c2cc(C(N)=O)ccc2)nc1C
CN[C@@H](Cc1ccc(O)c(N2CC(=O)NS2(=O)=O)c1F)c1cccc([C@]2(F)C[C@@H]2c2ncco2)c1	C[C@@H](c1cccc([C@](C2)([C@H]2c2ncco2)F)c1)NC
Cn1cccc(CN[C@H]2C[C@@H]2[C@H]2CCCN2c2cccc(-c3ccc(O)c(N4CC(=O)NS4(=O)=O)c3F)c2)c1=O	c1cccc(N(CCC2)C2C2CC2)c1
CNC(=O)c1c(F)c(-c2ccc(O)c(N3CC(=O)NS3(=O)=O)c2F)cn1[C@@H]1C[C@@H]1c1ccccc1	c1cn([C@H](C2)[C@H]2c2ccccc2)c(C(NC)=O)c1F
CNc1nc([C@@H]2CCCCN2c2ccc(-c3ccc(O)c(N4CC(=O)NS4(=O)=O)c3F)cc2)ncc1C	c(cc1)ccc1N(CCCC1)[C@@H]1c1ncc(C)c(NC)n1
COc1ccc([C@H]2CCCN2c2cccc(-c3ccc(O)c(N4CC(=O)NS4(=O)=O)c3F)c2)nc1N	c1cccc(N(CCC2)[C@H]2c(cc2)nc(N)c2OC)c1
COc1ccc(CN[C@@H]2C[C@@H]2[C@@H]2C[C@@H](c3ccc(O)c(N4CC(=O)NS4(=O)=O)c3F)CN2c2ccccc2)c(=O)[nH]1	C(CC1C2CC2)CN1c1ccccc1
N#C[C@@]1([C@H]2CCCNN2)CC[C@H]1c1cccc(OCc2ccc(O)c(N3CC(=O)NS3(=O)=O)c2F)c1	COc1cc([C@H](CC2)[C@@]2([C@@H]2NNCCC2)C#N)ccc1
NC(=O)c1cc([C@H]2CCN2c2ccc(-c3ccc(O)c(N4CC(=O)NS4(=O)=O)c3F)cn2)ccc1F	c(cc1)cnc1N(CC1)[C@H]1c(cc1)cc(C(N)=O)c1F
NC(=O)c1cccc([C@@]2(F)C[C@H]2c2cc(-c3ccc(O)c(N4CC(=O)NS4(=O)=O)c3F)sn2)c1	c1cc([C@H](C2)[C@]2(c2cc(C(N)=O)ccc2)F)ns1
NC(=O)c1cccc([C@@H]2C[C@H]2c2cc(-c3ccc(O)c(N4CC(=O)NS4(=O)=O)c3F)[nH]n2)n1	c1cc([C@H](C2)[C@@H]2c2cccc(C(N)=O)n2)n[nH]1
NC(=O)c1cccc([C@H]2C[C@@H]2c2cc(-c3ccc(O)c(N4CC(=O)NS4(=O)=O)c3F)sn2)c1	c1cc([C@@H](C2)[C@H]2c2cc(C(N)=O)ccc2)ns1
NC(=O)c1cccc([C@H]2CCCN2c2cc(-c3ccc(O)c(N4CC(=O)NS4(=O)=O)c3F)ccn2)c1	c1cc(N(CCC2)[C@H]2c2cccc(C(N)=O)c2)ncc1
NC(=O)c1ccnc([C@H]2C[C@@H]2c2cc(-c3ccc(O)c(N4CC(=O)NS4(=O)=O)c3F)n[nH]2)c1	c1n[nH]c([C@@H](C2)[C@H]2c2nccc(C(N)=O)c2)c1
O=C1CN(c2c(O)ccc([C@H](O)COc3cccc([C@@H]4CCCN4[C@@H]4CCCNN4)c3)c2F)S(=O)(=O)N1	[C@@H](COc1cc([C@H](CCC2)N2[C@H]2NNCCC2)ccc1)O
O=C1CN(c2c(O)ccc([C@H]3CCN(c4ccccc4)[C@H]3[C@@H]3C[C@@H]3NC[C@@H]3N[C@H](C4CC4)CCC3=O)c2F)S(=O)(=O)N1	C(CC1)C(C2CC2)N1c1ccccc1
O=C1CN(c2c(O)ccc(-c3ccc(N4CC[C@@H]4[C@@H]4C[C@H]4NCc4cccc(F)c4)cc3)c2F)S(=O)(=O)N1	c(cc1)ccc1N(CC1)C1C1CC1
O=C1CN(c2c(O)ccc(-c3ccc(N4CCC[C@H]4[C@@H]4C[C@H]4NC(=O)c4cccnc4)cc3)c2F)S(=O)(=O)N1	c(cc1)ccc1N(CCC1)C1C(C1)C1N
O=C1CN(c2c(O)ccc(-c3ccc(N4CCC[C@H]4[C@H]4C[C@@H]4NCc4ccc[nH]c4=O)cc3)c2F)S(=O)(=O)N1	c(cc1)ccc1N(CCC1)C1C1CC1
O=C1CN(c2c(O)ccc(-c3ccc(N4CCCC[C@H]4[C@H]4C[C@@H]4NCc4cnccc4N4CCC4)cc3)c2F)S(=O)(=O)N1	c(cc1)ccc1N(CCCC1)C1C1CC1
C[C@@H](NC[C@H]1CCCN1[C@@H]1CCCNN1)[C@](F)(Cc1cccc(C(F)F)c1)c1ccc(O)c(N2CC(=O)NS2(=O)=O)c1F C[C@H]([C@H]1CCCN1c1ccc(-c2ccc(O)c(N3CC(=O)NS3(=O)=O)c2F)cc1)C(F)(F)Cc1cc(N)n(C)n1 C[C@H](NC[C@H]1CCCN1[C@H]1CCCNN1)[C@H](F)Cc1cc(C(F)F)ccc1-c1ccc(O)c(N2CC(=O)NS2(=O)=O)c1F C[C@H]1C[C@H](C(=O)[C@H]2CCCCN2c2ccc(-c3ccc(O)c(N4CC(=O)NS4(=O)=O)c3F)cc2)[C@@H](C)N1 C[C@H]1COC[C@@H](Cc2cccc(N3CC[C@@H](c4ccc(O)c(N5…	[C@@](Cc1cc(C(F)F)ccc1)([C@@H](C)NC[C@@H](CCC1)N1[C@H]1NNCCC1)F c(cc1)ccc1N(CCC1)[C@H]1[C@@H](C)C(Cc1nn(C)c(N)c1)(F)F c1c(C[C@H]([C@H](C)NC[C@@H](CCC2)N2[C@@H]2NNCCC2)F)cc(C(F)F)cc1 c(cc1)ccc1N(CCCC1)[C@H]1C([C@@H]1[C@@H](C)N[C@@H](C)C1)=O [C@H](CC1)CN1c1cccc(C[C@H]2N[C@@H](C)COC2)n1 c1cccc(N(CCCC2)[C@H]2C(C[C@@H]2N[C@@H](C)NC2)=O)c1 c(cc1)cnc1N1[C@H](Cc2cc(C(C)=O)c[nH]2)CCC1 [C@H](C[C@H]1NC[C@@H…	Nc1nnc(NC(CC2)CCN2c2nnc(N)s2)s1	BB 136	Buchwald reaction	Amine	31
		CC(CNCC1)N1c(cc1)cnc1Nc1cc(Cl)cnc1OC	BB 3
		Cc1c(CN)ccc(-c2ccnc(Nc3cn(C)nc3)n2)c1	BB 8
Cc1ccc(F)c(NC(=O)C[C@@]2(F)C[C@@H]2[C@H]2CCCN2c2ccc(-c3ccc(O)c(N4CC(=O)NS4(=O)=O)c3F)cc2)n1	c(cc1)ccc1N(CCC1)C1C(C1)C1(CC=O)F					32
C[C@@]1([C@H]2C[C@@H]2n2ccc(-c3ccc(O)c(N4CC(=O)NS4(=O)=O)c3F)cc2=O)CCN1C(=O)c1ccn[nH]1	C(C=CN1[C@@H](C2)[C@H]2[C@](C)(CC2)N2C(c2ccn[nH]2)=O)=CC1=O
C[C@]1([C@H]2C[C@@H]2n2ccccc2=O)CCN1C(=O)c1cc(-c2ccc(O)c(N3CC(=O)NS3(=O)=O)c2F)n[nH]1	c1n[nH]c(C(N(CC2)[C@@]2(C)[C@@H](C2)[C@H]2N(C=CC=C2)C2=O)=O)c1
C[C@@]1(COCc2ccc(O)c(N3CC(=O)NS3(=O)=O)c2F)CC[C@H]1NC1(c2ccsn2)CSC1 Cc1cccnc1NCCc1cccc(NCCC(F)(F)c2ccc(O)c(N3CC(=O)NS3(=O)=O)c2F)n1 Cc1nocc1CNS(=O)(=O)N(CCc1ccc(O)c(N2CC(=O)NS2(=O)=O)c1F)CC1CC1 CO[C@H](CCNc1cccc(F)c1)c1ccc(-c2ccc(O)c(N3CC(=O)NS3(=O)=O)c2F)c(N)n1 N#Cc1ccccc1NC(=O)C[C@@]1(F)C[C@]1(COc1ccccc1)c1ccc(O)c(N2CC(=O)NS2(=O)=O)c1F O=C1CN(c2c(O)ccc(CC[C@@H](C(=O)NC3CCC(F)(F)CC3)c3ccccc3)c2F…	COCC1(C)CCC1 C(CCNc1nc(CC)ccc1)(F)F CCN(CC1CC1)S(=O)=O c1c(N)nc(C(CC)OC)cc1 C(C)(C1)C1(CC=O)F CCC(C=O)c1ccccc1	NCC1(CN)CNC1	BB 104	Buchwald reaction	Amine	33
		NCC(CNC(OCc1ccccc1)=O)=O	BB 110
		NCCNCCN1CCNCC1	BB 111
		CN(C)CCNc(ccc(N)c1)c1F	BB 122
		OCC(C(CO)O)N1CCNCCNCCNCC1	BB 157
		CC(C)(C)NCC(c(cc1Cl)cc(Cl)c1N)=O	BB 177
		COCCCNC1CNCCC1	BB 185
		CC(C)NCCC1CCNCC1	BB 38
		CNCC(OCc1c(NC)nccc1)=O	BB 39
		CCC1(CN)CNC1	BB 84
		CNC(C1(CNCCC1)N)=O	BB 90
CC[C@H](CN[C@@H]1CCCCC12CCN(c1ccccc1)CC2)NCc1ccc(O)c(N2CC(=O)NS2(=O)=O)c1F	CN[C@H](CC)CN[C@H](CCCC1)C1(CC1)CCN1c1ccccc1					34
N[C@H](CCC[C@@H]1CCCC[C@@]12CCN(c1cc[nH]n1)C2)Cc1ccc(O)c(N2CC(=O)NS2(=O)=O)c1F	C[C@@H](CCC[C@H]1[C@@](CC2)(CN2c2n[nH]cc2)CCCC1)N
O=C1CN(c2c(O)ccc(CN[C@@H](CC(F)F)CN3CCC[C@]34CCN(c3cc[nH]n3)C4)c2F)S(=O)(=O)N1	CN[C@@H](CC(F)F)CN(CCC1)[C@]1(CC1)CN1c1n[nH]cc1
Cc1c(S(=O)(=O)Nc2cccc(F)c2)cc(C2CC2)n1-c1ccc(O)c(N2CC(=O)NS2(=O)=O)c1F	n1c(C2CC2)cc(S(Nc2cc(F)ccc2)(=O)=O)c1C					35
COC[C@@H](CCNc1cccnc1)c1cc(C)n(-c2ccc(O)c(N3CC(=O)NS3(=O)=O)c2F)n1	n1nc([C@H](CCNc2cnccc2)COC)cc1C
O=C1CN(c2c(O)ccc(-n3cc([C@H]4CCCCC[C@H]4NCc4ccccc4F)cn3)c2F)S(=O)(=O)N1	n1ncc(C2CCCCCC2)c1
O=C1CN(c2c(O)ccc(-n3ncc([C@H]4C[C@H]4CNC(=O)[C@H]4CCCCN4c4ccccc4)c3F)c2F)S(=O)(=O)N1	n1ncc([C@@H]2[C@H](CNC([C@@H](CCCC3)N3c3ccccc3)=O)C2)c1F
C=C1C=C(C(=O)Nc2cc(=O)[nH]cc2[C@H]2C[C@@H]2c2ccc(O)c(N3CC(=O)NS3(=O)=O)c2F)N(CCCC)O1	[C@@H](C1)[C@H]1C(C(NC(C(N(CCCC)O1)=CC1=C)=O)=C1)=CNC1=O					36
O=C1CN(c2c(O)ccc(C[C@@H]3C[C@@H]4[C@H](O)CCN(c5ccc(=O)n(C6CCCC6)c5)N4N3)c2F)S(=O)(=O)N1	C[C@H](C[C@@H]1[C@@H](CC2)O)NN1N2C(C=C1)=CN(C2CCCC2)C1=O					37
C[C@H]([C@H]1COCCc2cc(-c3ccc(O)c(N4CC(=O)NS4(=O)=O)c3F)ccc21)N1CCCC(=O)N1 C[C@H](N[C@@H]1C[C@H](c2ccc(O)c(N3CC(=O)NS3(=O)=O)c2F)Cc2ccccc21)c1ccc(=O)n(C2CC2)n1 Cc1ccc(NC(=O)[C@H]2CCOc3cc(-c4ccc(O)c(N5CC(=O)NS5(=O)=O)c4F)ccc32)nc1 Cc1ccc(NC[C@@]2(C)COCc3cc(-c4ccc(O)c(N5CC(=O)NS5(=O)=O)c4F)ccc32)nc1C Cc1ccnn1C[C@@H]1CCCC[C@H]1NC(=O)[C@@H]1C[C@H](c2ccc(O)c(N3CC(=O)NS3(=O)=O)c2F)Cc2ncccc21 Cn1ncc2c1C[…	c1cc(CCOCC2CC)c2cc1 C(CC1)Cc2c1cccc2 c1cc(OCCC2C=O)c2cc1 c1cc(COCC2(C)C)c2cc1 C(CC1C=O)Cc2c1cccn2 C(CC1N)Cc2c1cnn2C C(CC1S(=O)=O)Cc2c1cccc2 c1cc(C(CCC2)S(=O)=O)c2cc1 c1ccc(C(C)CCC2)c2n1 c1cc(CCCC2)c2cc1 Cn1c(CCCC2(C)C#N)c2cc1 c1cc(CCCC2(C)C#N)c2cc1 COC(CCC1)c2c1cccc2 C(CC1N)Cc2c1cccc2 C1C(CCC2)C2CCC1 C(CC1S(=O)=O)Oc2c1cccc2 c1nc(CCCC2S(=O)=O)c2cc1 c1nn(CCCC2C)c2c1 c1cc(CC2S(=O)=O)c2cc1 c1cc(CCCC2…	NC(CC1)C2C1CNC2	BB 100	Buchwald reaction	Amine	38
		Nc1cccc2c1CCN2	BB 138
		Nc1n[nH]c2c1CNCC2	BB 139
		CC1Nc(cccc2)c2NC1C	BB 15
		NC(C1)CC2C1CCNC2	BB 166
		NC(CC1)C2C1CNCC2	BB 169
		C1NC2C1NCC2	BB 175
		Nc1c2NCCc2ccc1	BB 179
		C1C(CNC2)C2NC1	BB 183
		Nc1nc(CCNC2)c2s1	BB 188
		Nc1cnc(CCNC2)c2c1	BB 190
		Nc(nc1)nc2c1NCCC2	BB 194
		Brc(cc1)cc2c1NCCN2	BB 20
		C1NC[C@H]2[C@H]1CNC2	BB 204
		Nc1nc(CCNC2)c2cc1	BB 206
		C1NC2C1CCNC2	BB 23
		FC1(C(CNCC2)C2NC1)F	BB 30
		C1NCC2OCCNC12	BB 32
		CNC(C1)CNc2c1cccc2	BB 33
		CO[C@]1(CNC2)[C@H]2CNC1	BB 4
		Cn(c1c2CNC1)nc2N	BB 54
		Nc1c(CNCC2)c2ccc1	BB 65
		Nc1c(CNCC2)n2nc1	BB 67
		C1NCC2C1CNC2	BB 69
		NCC1Nc(cccc2)c2OC1	BB 74
		CC1NCc2c1[nH]nc2N	BB 81
		Nc(cc1)cc2c1NCCC2	BB 91
C[C@@H]1N[C@H](N2CCC[C@@H]2Cc2ccccc2NC2CC2)C[C@H]1Cc1ccc(O)c(N2CC(=O)NS2(=O)=O)c1F	C[C@H](C1)[C@H](C)N[C@@H]1N1[C@@H](Cc(cccc2)c2NC2CC2)CCC1					39
C[C@]1(C(=O)[C@@H]2C[C@H]2c2ccccc2)CCN1C(=O)[C@H]1C[C@H](c2ccc(O)c(N3CC(=O)NS3(=O)=O)c2F)CNN1	[C@@H](C1)CNN[C@H]1C(N(CC1)[C@@]1(C)C([C@H](C1)[C@@H]1c1ccccc1)=O)=O
C[C@]1(Cc2ccccc2NC[C@@H]2CCCOC2)CCN1c1cc(-c2ccc(O)c(N3CC(=O)NS3(=O)=O)c2F)ccn1	c1cc(N2[C@@](C)(Cc(cccc3)c3NC[C@H]3COCCC3)CC2)ncc1
C[C@H]1CCC[C@H]1Oc1cc(CNC2([C@H]3CCCNN3)CC2)cc(-c2ccc(O)c(N3CC(=O)NS3(=O)=O)c2F)c1	c1cc(O[C@H]2[C@@H](C)CCC2)cc(CNC2(CC2)[C@@H]2NNCCC2)c1
CO[C@H](c1ccccc1)[C@H]1CC[C@H]1NC(=O)c1cc(C2CC2)[nH]c1-c1ccc(O)c(N2CC(=O)NS2(=O)=O)c1F	c([nH]c(C1CC1)c1)c1C(N[C@H](CC1)[C@H]1[C@@H](c1ccccc1)OC)=O
O=C1CN(c2c(O)ccc([C@@H]3C[C@H]3c3cccn3Cc3cccc(Nc4cc(F)cc(F)c4)c3)c2F)S(=O)(=O)N1	[C@H](C1)[C@@H]1c1cccn1Cc1cccc(Nc2cc(F)cc(F)c2)c1
O=C1CN(c2c(O)ccc([C@H]3C[C@@H](Cn4ccc(-c5cccc(F)c5)c4)[C@@H]3NCC3NCCN3)c2F)S(=O)(=O)N1	[C@@H](C[C@H]1Cn(cc2)cc2-c2cccc(F)c2)[C@H]1NCC1NCCN1
O=C1CN(c2c(O)ccc(-c3ccc(Oc4cccc(Cc5cccc(C6CC6)n5)n4)cc3)c2F)S(=O)(=O)N1	c(cc1)ccc1Oc1nc(Cc2nc(C3CC3)ccc2)ccc1
O=C1CN(c2c(O)ccc(-c3ccnc([C@@H]4C[C@H]4NC[C@@H]4CCCN4C(=O)CCc4ccccc4)c3)c2F)S(=O)(=O)N1	c1cc([C@H](C2)[C@@H]2NC[C@H](CCC2)N2C(CCc2ccccc2)=O)ncc1
O=C1CN(c2c(O)ccc(-c3cnc(C4CCC4)c(N[C@@H]4CCCCC[C@H]4COc4ccccc4)c3)c2F)S(=O)(=O)N1	c1cc(N[C@H]2[C@H](COc3ccccc3)CCCCC2)c(C2CCC2)nc1
O=C1CN(c2c(O)ccc([C@H]3C[C@H](Nc4ccon4)C[C@@]4(CCCc5cn[nH]c54)C3)c2F)S(=O)(=O)N1	[C@@H](C[C@@H](C1)Nc2nocc2)C[C@@]1(CCC1)c2c1cn[nH]2					40
C=C(Nc1cc(-c2ccc(O)c(N3CC(=O)NS3(=O)=O)c2F)c(C)cn1)c1ccccc1NS(=O)(=O)CC(C)(F)F C=C(Nc1ccc(C)cn1)c1ccccc1NS(=O)(=O)[C@H](c1ccc(O)c(N2CC(=O)NS2(=O)=O)c1F)C(C)(F)F CC[C@@](C#N)(C(N)=O)c1cccc(CCn2ccc(-c3ccc(O)c(N4CC(=O)NS4(=O)=O)c3F)n2)c1 Cc1cc(N[C@H](C)c2ccccc2NS(=O)(=O)CC(F)(F)F)cc(-c2ccc(O)c(N3CC(=O)NS3(=O)=O)c2F)c1 Cc1cc(N[C@H](C)c2ccccc2NS(=O)(=O)CC(F)(F)F)ccc1-c1ccc(O)c(N2CC(=O)NS2(=O)=O)c1F Cc…	c1cc(NC(c(cccc2)c2NS(CC(C)(F)F)(=O)=O)=C)ncc1C [C@H](C(C)(F)F)S(Nc(cccc1)c1C(Nc1ncc(C)cc1)=C)(=O)=O c1nn(CCc2cccc([C@@](CC)(C(N)=O)C#N)c2)cc1 c1cc(N[C@H](C)c(cccc2)c2NS(CC(F)(F)F)(=O)=O)cc(C)c1 c(cc1)c(C)cc1N[C@H](C)c(cccc1)c1NS(CC(F)(F)F)(=O)=O c1ccc(CNc2cc(NS(CCC(F)(F)F)(=O)=O)c(C)cc2)cc1 c1c(CNc2cc(NS(CCC(F)(F)F)(=O)=O)c(C)cc2)cccc1 c(cc1C)cnc1N[C@@H](c(cccc1)c1NS(CCC)(=O)=O)C#N [C@@H](CN(C)c1…	NCCNC(c1nccc(Oc(cc2)ccc2N)c1)=O	BB 147	Buchwald reaction	Amine	41
Cn1ncc2c1CCC[C@H]2Nc1ncsc1N1CCC(c2ccc(O)c(N3CC(=O)NS3(=O)=O)c2F)CC1	C(CC1)CCN1c1c(N[C@H](CCC2)c3c2n(C)nc3)ncs1					42
O=C1CN(c2c(O)ccc([C@H]3C[C@@H](C[C@H]4Cn5cccc5O4)NN[C@@H]3[C@H]3CC3(F)F)c2F)S(=O)(=O)N1	[C@@H]1[C@@H]([C@@H](C2)C2(F)F)NN[C@H](C[C@@H]2Oc3cccn3C2)C1
O=C1CN(c2c(O)ccc([C@H]3CCC[C@H](C(=O)N[C@@H]4CCCc5n[nH]cc54)N(c4ccccc4)C3)c2F)S(=O)(=O)N1	[C@@H](CCC[C@@H]1C(N[C@H]2c3c[nH]nc3CCC2)=O)CN1c1ccccc1
O=C1CN(c2c(O)ccc(CCCS(=O)(=O)N[C@H]3CCN(c4ccccc4)c4cnccc43)c2F)S(=O)(=O)N1	CCCS(N[C@@H](CC1)c(ccnc2)c2N1c1ccccc1)(=O)=O					43
O=C1CN(c2c(O)ccc([C@H]3COCC[C@@H]3[C@H]3CC[C@@]4(CN(c5cc[nH]n5)c5ccccc54)N3)c2F)S(=O)(=O)N1	[C@@H](COCC1)[C@H]1[C@@H](CC1)N[C@@]1(C1)c(cccc2)c2N1c1n[nH]cc1					44
CC[C@H](C#N)c1cncc(-c2ccccc2NC[C@H]2[C@H](c3ccc(O)c(N4CC(=O)NS4(=O)=O)c3F)C2(F)F)c1	[C@@H]([C@@H]1CNc(cccc2)c2-c2cncc([C@H](CC)C#N)c2)C1(F)F					45
CCN(CC)c1ccc([C@H]2C[C@@]2(F)CC(=O)Nc2cnccc2F)cc1-c1ccc(O)c(N2CC(=O)NS2(=O)=O)c1F	c(cc([C@@H](C1)[C@@]1(CC(Nc(cncc1)c1F)=O)F)cc1)c1N(CC)CC
O=C1CN(c2c(O)ccc([C@@H]3C[C@H]3[C@@]3(C(=O)c4ccccc4)CC[C@@]4(CCN(c5cccnc5)C4)N3)c2F)S(=O)(=O)N1	[C@H](C1)[C@@H]1[C@](CC1)(C(c2ccccc2)=O)N[C@@]1(CC1)CN1c1cnccc1					46
C[C@@]1(c2ccc(O)c(N3CC(=O)NS3(=O)=O)c2F)CC[C@@H](NCc2cccc(F)c2)NN1 C[C@@H](Cc1ccc(O)c(N2CC(=O)NS2(=O)=O)c1F)[C@@H]1NC[C@H](NS(=O)(=O)C2CC2)N1 C[C@@H](Cc1ccc(O)c(N2CC(=O)NS2(=O)=O)c1F)c1cccc(S(=O)(=O)Nc2ccsn2)n1 C[C@@H](Cc1cccc(C(N)=O)c1)Cn1ccc(-c2ccc(O)c(N3CC(=O)NS3(=O)=O)c2F)n1 C[C@@H](CNc1cccc(CCNc2ccccn2)n1)Cc1ccc(O)c(N2CC(=O)NS2(=O)=O)c1F C[C@@H](COC[C@H]1NN[C@H]1C)Cc1ccc(-c2ccc(O)c(N3CC(=O)N…	C1(C)NNCCC1 CC(C)C1NCCN1 CC(C)c1cccc(S(=O)=O)n1 c1n[nH]cc1 CC(C)CNc1nc(CC)ccc1 c1ccc(CC(C)C)cc1 c1cc(CC)c(C)cc1 c1cccc(OCC)c1 COC(C)c1c(C)cccc1 CC1NCCCC1C C1NCCC1C c(c(CC)ccc1)c1F C(C)Cc(cc1)ccc1F C(C1)CNC1C(C)C c1cccc(C(C)N)c1 c1cc(C#N)cc(C)c1 c(cccc1)c1C(C)=O C1CNC(C)CC1 C1(C)NCNC1 c1cc(N)cc(CCC)c1 c1ccccc1 c(ccc(C(C)(C)C=O)c1)c1F c1csc(N)n1 CC(C)(C)c1cccc(S(=O)=O)n1 c1ccc(C(C)(C)CC)nc1N c1ccc(…	CNc(cc(cc1)F)c1N	BB 101	Buchwald reaction	Amine	47
		CNCC1CNC1	BB 102
		NCC1CNC1	BB 103
		NCC1(CNC1)O	BB 105
		CNC(C1)CC1N	BB 106
		NCC1NCCNC1	BB 107
		NC1CNC1	BB 108
		CNc(ccnc1Br)c1N	BB 112
		CNc(cc1)ncc1N	BB 113
		CC(C)(C1CCNCC1)N	BB 115
		CC(C1CCNCC1)N	BB 116
		CN[C@H](C1)C[C@@H]1N	BB 117
		NCC(CCNC1)C1O	BB 118
		NCCC1CNCCC1	BB 119
		NCc(cc1)ccc1NCCO	BB 120
		NCC1NCCCC1	BB 124
		NCC1CNC1	BB 125
		NC(CCNC1)C1C(F)(F)F	BB 126
		CC(Nc1cc(CN)ccc1)=O	BB 127
		NC(CNCC1)C1O	BB 128
		NC(CC1)CCC1NCC(F)F	BB 134
		NC(CCC1)CC1NCCF	BB 137
		NC(CCC1)CC1NCC(F)F	BB 141
		CC(C)NCC1CCNCC1	BB 142
		NC1(CF)CNCC1	BB 143
		NCCCC1NCCCC1O	BB 144
		CC1(CNCC1)NC	BB 149
		NC1(CNC1)C(F)F	BB 151
		NC1C(CO)CNCC1	BB 152
		CC(C(F)F)NC(CC1)CCC1N	BB 153
		CC(C1CNCCC1)N	BB 154
		NC1CCNCC1	BB 156
		NC(CC1)CCC1NCCF	BB 158
		NC(CNCC1)C1C(F)(F)F	BB 159
		CC(C)CC1NCCNC1	BB 176
		CCC1NCCNC1	BB 182
		CCNc(cccc1)c1NCC	BB 19
		CC(CNCC1)C1N	BB 40
		CC(CCNC1)C1NC	BB 41
		CNCC1OCCNC1	BB 50
		CNc(ccc(Br)c1)c1N	BB 51
		NCC1NCCOC1	BB 58
		CC(C)Nc1ncccc1N	BB 60
		CC1(CN)NCCC1	BB 62
		CC(C)(CNCC1)C1NC	BB 63
		CNC(CCNC1)C1(F)F	BB 64
		CC1(C)C(CN)CNC1	BB 66
		CNc(cncc1)c1N	BB 70
		NC(CNC1)C1F	BB 71
		CC(C)(CC1)NCC1N	BB 72
		NC(C1CCNCC1)C(F)(F)F	BB 75
		CC(Nc(cc1)ccc1N)=O	BB 76
		Nc(cc1)cc([N+]([O-])=O)c1NCCO	BB 82
		CC1NCCCC1N	BB 87
		NCCNc1ccccc1	BB 89
		NCCCC1NCCC1	BB 95
		CNC1CNC1	BB 97
C[C@]12CC[C@H](C1)N(NCc1ccccc1-c1cc(-c3ccc(O)c(N4CC(=O)NS4(=O)=O)c3F)on1)C2	c1cc(-c2c(CNN3[C@H](CC4)C[C@@]4(C)C3)cccc2)no1					48
Cc1ccccc1NC(=O)[C@@H]1C[C@H]1c1cccc(N(C)[C@@H]2C[C@H]2c2ccc(O)c(N3CC(=O)NS3(=O)=O)c2F)n1	[C@H](C1)[C@@H]1N(C)c1cccc([C@H](C2)[C@@H]2C(Nc2c(C)cccc2)=O)n1					49
Cn1cc(NC2CC2)nc1[C@@H]1C[C@@H]1C(=O)NCc1ccc(-c2ccc(O)c(N3CC(=O)NS3(=O)=O)c2F)cc1	c1ccc(CNC([C@@H](C2)[C@@H]2c2nc(NC3CC3)cn2C)=O)cc1
Cn1cc(NC2CC2)nc1[C@H]1C[C@H]1C(=O)NCc1cccc(-c2ccc(O)c(N3CC(=O)NS3(=O)=O)c2F)c1	c1cccc(CNC([C@H](C2)[C@H]2c2nc(NC3CC3)cn2C)=O)c1
N#Cc1c(N[C@@H]2C[C@@H]2c2ccn(C[C@H]3CCCO3)n2)cccc1-c1ccc(O)c(N2CC(=O)NS2(=O)=O)c1F	c1cccc(N[C@H](C2)[C@H]2c2nn(C[C@@H]3OCCC3)cc2)c1C#N
O=C(C[C@]1(F)C[C@@H]1c1cc(C[C@H]2CC2(F)F)on1)Nc1ccc(-c2ccc(O)c(N3CC(=O)NS3(=O)=O)c2F)cc1	c(cc1)ccc1NC(C[C@](C1)([C@H]1c1noc(C[C@@H](C2)C2(F)F)c1)F)=O
O=C1CN(c2c(O)ccc([C@@H](O[C@@H]3C[C@H]3c3ccn(CC[C@H]4CCCN4)n3)c3ccccc3)c2F)S(=O)(=O)N1	[C@H](c1ccccc1)O[C@H](C1)[C@@H]1c1nn(CC[C@@H]2NCCC2)cc1
O=C1CN(c2c(O)ccc([C@@H]3CO[C@H](Cn4cccc4[C@@H]4C[C@H]4CNc4ccccn4)C3)c2F)S(=O)(=O)N1	[C@@H]1CO[C@H](Cn2c([C@H]3[C@H](CNc4ncccc4)C3)ccc2)C1
O=C1CN(c2c(O)ccc(C3(Cn4ccc([C@@H]5C[C@@H]5NS(=O)(=O)c5ccccc5)n4)CC3)c2F)S(=O)(=O)N1	C1(Cn2nc([C@H](C3)[C@H]3NS(c3ccccc3)(=O)=O)cc2)CC1
O=C1CN(c2c(O)ccc(-c3ccc(Oc4cccc([C@@H]5C[C@H]5NC5CC5)n4)nc3)c2F)S(=O)(=O)N1	c(cc1)cnc1Oc1nc([C@H](C2)[C@@H]2NC2CC2)ccc1
O=C1CN(c2c(O)ccc(-c3cccc(Oc4cccc([C@@H]5C[C@H]5NC5CC5)n4)c3)c2F)S(=O)(=O)N1	c1cccc(Oc2nc([C@H](C3)[C@@H]3NC3CC3)ccc2)c1
O=C1CN(c2c(O)ccc(-c3cccc(Oc4cccc([C@H]5C[C@@H]5C(=O)c5ccccc5)n4)c3)c2F)S(=O)(=O)N1	c1cccc(Oc2cccc([C@@H](C3)[C@H]3C(c3ccccc3)=O)n2)c1
O=C1CN(c2c(O)ccc(-c3nn(CC4COC4)cc3[C@@H]3C[C@H]3C(=O)Nc3ccccc3F)c2F)S(=O)(=O)N1	c1nn(CC2COC2)cc1[C@H](C1)[C@@H]1C(Nc(cccc1)c1F)=O
Cc1cc2c(cc1C)S(=O)(=O)CC[C@H]2Cn1cccc1NCCc1ccc(O)c(N2CC(=O)NS2(=O)=O)c1F	CCNc1cccn1C[C@H](CC1)c(cc(C)c(C)c2)c2S1(=O)=O					50
O=C1CN(c2c(O)ccc(-c3ccc4c(c3)C(=O)CC[C@@H]4S(=O)(=O)Nc3ccccc3)c2F)S(=O)(=O)N1	c1cc(C(CC[C@@H]2S(Nc3ccccc3)(=O)=O)=O)c2cc1
Cc1cc(-c2ccc(O)c(N3CC(=O)NS3(=O)=O)c2F)cc([C@H]2CC[C@]3(CCN(c4cc[nH]n4)C3)N2)n1	c1cc([C@@H](CC2)N[C@]2(CC2)CN2c2n[nH]cc2)nc(C)c1					51
COc1cccc([C@H]2N[C@@]3(CCN(c4cc[nH]n4)C3)C[C@@H]2c2ccc(O)c(N3CC(=O)NS3(=O)=O)c2F)c1	[C@@H](C1)[C@@H](c2cccc(OC)c2)N[C@]1(CC1)CN1c1n[nH]cc1
N#Cc1c([C@@H]2CN[C@@]23CCN([C@@H]2CCCNN2)C3)ccnc1-c1ccc(O)c(N2CC(=O)NS2(=O)=O)c1F	c1nccc([C@H]2[C@@](CC3)(CN3[C@H]3NNCCC3)NC2)c1C#N
N#Cc1cc([C@H]2CC[C@]3(CCN([C@H]4CCCNN4)C3)O2)ccc1-c1ccc(O)c(N2CC(=O)NS2(=O)=O)c1F	c(ccc([C@@H](CC1)O[C@]1(CC1)CN1[C@@H]1NNCCC1)c1)c1C#N
N#Cc1ccc([C@@H]2CCCC23CN(c2cc(-c4ccc(O)c(N5CC(=O)NS5(=O)=O)c4F)n[nH]2)C3)cc1	c1n[nH]c(N(C2)CC2(CCC2)[C@@H]2c(cc2)ccc2C#N)c1
N#Cc1ccsc1N1C[C@H](c2ccc(O)c(N3CC(=O)NS3(=O)=O)c2F)[C@@]2(CC[C@@H](c3ccccc3F)NC2)C1	[C@@H](CN(C1)c(scc2)c2C#N)[C@]1(CC1)CN[C@@H]1c(cccc1)c1F
O=C1CN(c2c(O)ccc([C@@H]3CN([C@H]4CCCNN4)C[C@]34CC[C@H](c3ccc(F)cc3)N4)c2F)S(=O)(=O)N1	[C@H](CN(C1)[C@@H]2NNCCC2)[C@]1(CC1)N[C@H]1c(cc1)ccc1F
O=C1CN(c2c(O)ccc(-c3ccc([C@@H]4CCO[C@@]45CCN(c4cc[nH]n4)C5)cc3)c2F)S(=O)(=O)N1	c1ccc([C@H]2[C@@](CC3)(CN3c3n[nH]cc3)OCC2)cc1
O=C1CN(c2c(O)ccc(COc3cccc([C@@H]4CCC5(CN(c6ccn[nH]6)C5)N4)c3)c2F)S(=O)(=O)N1	COc1cc([C@H]2NC(C3)(CN3c3ccn[nH]3)CC2)ccc1
Cc1ccc(N2CC3(CCCC[C@H]3NCc3cc(-c4ccc(O)c(N5CC(=O)NS5(=O)=O)c4F)[nH]n3)C2)nc1	c1cc(CN[C@H]2C(C3)(CN3c3ncc(C)cc3)CCCC2)n[nH]1					52
O=C1CN(c2c(O)ccc(C[C@@H](CCN3CCC[C@@]34CCN([C@@H]3CCCNN3)C4)N3CCCC3)c2F)S(=O)(=O)N1	C[C@@H](CCN(CCC1)[C@@]1(CC1)CN1[C@H]1NNCCC1)N1CCCC1
O=C1CN(c2c(O)ccc(-c3cc(CN[C@H]4CC[C@@]45CC[C@@H](n4cccn4)C5)[nH]n3)c2F)S(=O)(=O)N1	c1n[nH]c(CN[C@@H](CC2)[C@@]2(CC2)C[C@@H]2n2nccc2)c1
O=C1CN(c2c(O)ccc(-c3cnn([C@H]4CC[C@]5(CC[C@H]5NCc5ccn[nH]5)C4)c3)c2F)S(=O)(=O)N1	c1cn([C@@H](CC2)C[C@]2(CC2)[C@@H]2NCc2ccn[nH]2)nc1
COc1cc([C@@H]2CCC[C@H]2n2ccc(=O)[nH]2)ccc1-c1ccc(O)c(N2CC(=O)NS2(=O)=O)c1F	c(ccc([C@H](CCC1)[C@@H]1N(C=C1)NC1=O)c1)c1OC					53
N#Cc1ccc(N2C[C@@H](c3ccc(O)c(N4CC(=O)NS4(=O)=O)c3F)Cc3cccc(C#N)c32)nc1NC1CCC1	[C@@H](Cc1ccc2)CN(c(cc3)nc(NC4CCC4)c3C#N)c1c2C#N					54
O=C1CN(c2c(O)ccc([C@@]34CCC[C@@H]3N([C@@H]3CC[C@H](NS(=O)(=O)c5ccccc5)N3)CC4)c2F)S(=O)(=O)N1	[C@](CCC1)(CC2)[C@H]1N2[C@H](CC1)N[C@H]1NS(c1ccccc1)(=O)=O
O=C1CN(c2c(O)ccc(-c3cc(NS(=O)(=O)C4CC4)cc(N4CCCCc5ccccc54)c3)c2F)S(=O)(=O)N1	c1cc(NS(C2CC2)(=O)=O)cc(N(CCCC2)c3c2cccc3)c1
O=C1CN(c2c(O)ccc(-c3ccc4c(c3)CC(F)(F)[C@@H]4c3ccn(C[C@H]4CCCO4)n3)c2F)S(=O)(=O)N1	c1cc(CC([C@@H]2c3nn(C[C@@H]4OCCC4)cc3)(F)F)c2cc1
O=C1CN(c2c(O)ccc(COc3cc(Oc4ccccn4)cc([C@@H]4CCCc5ccccc5N4)c3)c2F)S(=O)(=O)N1	COc1cc([C@H](CCC2)Nc3c2cccc3)cc(Oc2ncccc2)c1
O=C1CN(c2c(O)ccc(-c3ccc(O[C@H]4C[C@@H]4[C@@H](Nc4ncc(Cl)s4)C4CC4)cc3)c2F)S(=O)(=O)N1	c(cc1)ccc1O[C@@H](C1)[C@H]1[C@H](C1CC1)Nc(s1)ncc1Cl					55
O=C1CN(c2c(O)ccc([C@@H]3C[C@H]3S(=O)(=O)Nc3c4c(nn3Cc3ccccc3)CCC4)c2F)S(=O)(=O)N1	[C@H](C1)[C@@H]1S(Nc1c(CCC2)c2nn1Cc1ccccc1)(=O)=O					56
O=C1CN(c2c(O)ccc(-c3ccc(Cn4c(NS(=O)(=O)C5CC5)cc5c4CCCC5)cc3)c2F)S(=O)(=O)N1	c1ccc(Cn2c(NS(C3CC3)(=O)=O)cc3c2CCCC3)cc1
O=C1CN(c2c(O)ccc(-c3ccc([C@H]4[C@H](CNc5ccccn5)C[C@H]5CC[C@@H]4O5)cc3)c2F)S(=O)(=O)N1	c1ccc([C@H]2[C@H](CNc3ncccc3)C[C@@H]3O[C@H]2CC3)cc1					57
O=C1CN(c2c(O)ccc(Cc3ccccc3[C@@H]3[C@@H](Nc4cccnc4)CC[C@H]4CC[C@@H]3O4)c2F)S(=O)(=O)N1	Cc1c([C@@H]([C@H](CC2)O[C@H]2CC2)[C@H]2Nc2cnccc2)cccc1
NC(=O)c1ccccc1N1[C@H]2C[C@H](Nc3ccccc3)C[C@@H]1[C@@H](c1ccc(O)c(N3CC(=O)NS3(=O)=O)c1F)C2 O=C1CN(c2c(O)ccc([C@]34CC[C@H](C[C@@H](CNc5ccccn5)C3)N4)c2F)S(=O)(=O)N1	C(C1)C2NC1CCC2 C1(CC2)NC2CC(C)C1	C1NCC2NC1CNC2	BB 109	Buchwald reaction	Amine	58
		NCC1CC(CC2)NC2C1	BB 133
		C(C1)CC2NC1CNC2	BB 168
		C1C2CNCC1CNC2	BB 192
		C1NCC2OC1CNC2	BB 196
		OC(C1)C2NC1CNC2	BB 59
		NCC(C1)C2CNC1C2	BB 92
		NC1C2CNCC1CCC2	BB 94
"C[C@@](C#N)(CCNc1ccccn1)c1ccc(-c2ccc(O)c(N3CC(=O)NS3(=O)=O)c2F)c(N)n1 C[C@@H]1CCN(S(=O)(=O)Nc2ccccc2CC(F)(F)F)[C@@H](c2ccc(O)c(N3CC(=O)NS3(=O)=O)c2F)C1 C[C@@H]1NO[C@H]1[C@H](CN[C@H]1CCCNN1)COCc1ccc(O)c(N2CC(=O)NS2(=O)=O)c1F C[C@H](Cc1ccc(O)c(N2CC(=O)NS2(=O)=O)c1F)c1ccc(CCn2cc(F)c(C(N)=O)c2)cc1 C[C@H](CNc1ccccn1)CC(C)(C)c1cccc(Nc2ccc(O)c(N3CC(=O)NS3(=O)=O)c2F)n1 C[C@H](Nc1ccccc1CS(=O)(=O)N1CCCC1)…	"c1c(N)nc([C@@](C)(CCNc2ncccc2)C#N)cc1 [C@@H](C[C@H](C)CC1)N1S(Nc1c(CC(F)(F)F)cccc1)(=O)=O COC[C@@H](CN[C@@H]1NNCCC1)[C@@H]1ON[C@H]1C C[C@@H](C)c1ccc(CCn(cc2C(N)=O)cc2F)cc1 Nc1nc(C(C)(C)C[C@H](C)CNc2ncccc2)ccc1 C[C@H](C)[C@H](C)Nc1c(CS(N2CCCC2)(=O)=O)cccc1 C1CNC(Cc2ccccc2)C1 c1cccc(CNc(cccc2)c2S(=O)=O)c1 c(cc1CCNc2cnc(C)cc2)cc(C=C)c1F c1cc(CC2CC2)n[nH]1 [C@@H](C1)[C@@H](C(C)(C)C)N[C@H]1S(Nc1ccccc…	C(CNCC1)C1Nc1ccccc1	BB 123	Buchwald reaction	Amine	59
		Nc(cc1)ccc1OC1CNCC1	BB 13
		Cc1nc(NC2CNCC2)nc(C)c1	BB 132
		Nc(cc1)cc([N+]([O-])=O)c1Nc1ccccc1	BB 146
		N#CC1(CCNCC1)NCc(cc1)ccc1Br	BB 150
		C(C1CCNCC1)NC1CC1	BB 155
		Clc(cccc1)c1NC1CCNCC1	BB 162
		Clc1ncccc1NC1CCNCC1	BB 164
		CC(c1cnccc1)Nc1cnc(N)nn1	BB 165
		Nc1ccc(CCNCC(c2ccccc2)O)cc1	BB 171
		CC1(CNC2CC2)CCNCC1	BB 172
		Nc(cc1)cnc1OC1CNCC1	BB 18
		C(C1)C1NC1CNCCC1	BB 181
		Cc(ccc(NC(Cc1csc(N)n1)=O)c1)c1Cl	BB 189
		C(C1CCNCC1)N1CCNCC1	BB 203
		C(CC1CCNCC1)CC1CCNCC1	BB 205
		C(C1CCCCC1)NC1CCNCC1	BB 35
		Clc(cc1)nnc1NC1CCNCC1	BB 42
		C(CNC1CCNCC1)c1ccccc1	BB 43
		FC(c1cc(Cl)c(NC2CCNCC2)nc1)(F)F	BB 44
		C(c1ccccc1)NC1CCNCC1	BB 45
		Nc(cccc1)c1OC1CCNCC1	BB 53
N#Cc1ncccc1N[C@@H]1C[C@]2(C[C@@H](c3ccc(O)c(N4CC(=O)NS4(=O)=O)c3F)C2)Oc2ccccc21	C(C1)CC1(CC1)Oc2c1cccc2	NC1c(cccc2)c2OC11CCNCC1	BB 57	Buchwald reaction	Amine	60
C[C@]12CCC[C@H](CN(NCc3cc(-c4ccc(O)c(N5CC(=O)NS5(=O)=O)c4F)ccc3Oc3ccccc3)C1)O2	c(cc1)cc(CNN2C[C@](C)(CCC3)O[C@H]3C2)c1Oc1ccccc1					61
O=C1CN(c2c(O)ccc(-c3cc(F)c4c(c3)-c3nccn3C[C@@H]4CNc3ccccn3)c2F)S(=O)(=O)N1	c1cc(F)c([C@@H](CNc2ncccc2)Cn2c-3ncc2)c3c1					62
C[C@H]1C[C@@H]([C@H]2C[C@]2(F)CC(=O)Nc2ccccc2)N[C@@H]1N1C[C@H]2CC[C@H](C2)[C@H](c2ccc(O)c(N3CC(=O)NS3(=O)=O)c2F)C1	[C@H](C1)[C@H](CC2)C[C@H]2CN1[C@H]([C@@H](C)C1)N[C@@H]1[C@@H](C1)[C@]1(CC(Nc1ccccc1)=O)F					63
C[C@@H]1NN(C)C(=O)[C@H]1CN[C@H]1C[C@@H]1[C@@H](Cc1ccc(O)c(N2CC(=O)NS2(=O)=O)c1F)N(C)c1ccccc1	C[C@H]([C@@H](C1)[C@H]1NC[C@@H]([C@H](C)NN1C)C1=O)N(C)c1ccccc1					64
N#Cc1ccccc1NC(=O)C1(Cn2ccc(-c3ccc(O)c(N4CC(=O)NS4(=O)=O)c3F)cc2=O)CC1	C(C=CN1CC2(CC2)C(Nc(cccc2)c2C#N)=O)=CC1=O
O=C1CN(c2c(O)ccc(-c3cccc(C[C@H](F)[C@H]4C[C@@H]4Cn4ccc(=O)[nH]4)c3)c2F)S(=O)(=O)N1	c1cccc(C[C@@H]([C@@H]2[C@@H](CN(C=C3)NC3=O)C2)F)c1
Cc1cc([C@@H]2CC[C@@H](C(=O)N[C@@H](CC3CCCC3)c3ccc(O)c(N4CC(=O)NS4(=O)=O)c3F)Oc3ccccc32)nn1C1CC1	[C@H](CC1CCCC1)NC([C@H](CC[C@H]1c2nn(C3CC3)c(C)c2)Oc2c1cccc2)=O					65
O=C1CN(c2c(O)ccc([C@H]3C[C@@]4(CC[C@@H](Nc5ccccn5)c5ccccc5O4)C3)c2F)S(=O)(=O)N1	[C@H](C1)C[C@]1(CC[C@H]1Nc2ncccc2)Oc2c1cccc2					66
O=C1CN(c2c(O)ccc([C@H]3CC[C@]4(CN(c5ccn[nH]5)c5cc(F)ccc54)N3)c2F)S(=O)(=O)N1	C(CC1)NC11c(ccc(F)c2)c2NC1	Fc(cc1)cc2c1NCC21CCNCC1	BB 180	Buchwald reaction	Amine	67
		Brc(cc1)cc2c1NCC21CCNCC1	BB 198	Buchwald reaction	Amine
		C1Nc2ncccc2C11CCNCC1	BB 24	Buchwald reaction	Amine
		Nc1n[nH]c2c1CNC21CCCC1	BB 85	Buchwald reaction	Amine
Cc1ccc(NCN2C(=O)CC[C@@H]2c2ccc(-c3ccc(O)c(N4CC(=O)NS4(=O)=O)c3F)c(F)c2)cn1	c(ccc([C@@H](CC1)N(CNc2cnc(C)cc2)C1=O)c1)c1F					68
Cc1ccc(NCN2C(=O)CC[C@H]2c2cc(F)cc(-c3ccc(O)c(N4CC(=O)NS4(=O)=O)c3F)c2)cn1	c1cc(F)cc([C@H](CC2)N(CNc3cnc(C)cc3)C2=O)c1
Cc1ccccc1NC(=O)[C@H](CCC(F)(F)F)n1cc(-c2ccc(O)c(N3CC(=O)NS3(=O)=O)c2F)c(=O)[nH]1	C1=CN([C@@H](CCC(F)(F)F)C(Nc2c(C)cccc2)=O)NC1=O					69
CC(=O)c1oc2c(c1C)[C@H](c1cc(-c3ccc(O)c(N4CC(=O)NS4(=O)=O)c3F)n[nH]1)CCC2 Cc1cc(-c2ccc(O)c(N3CC(=O)NS3(=O)=O)c2F)ccc1N1CCCc2cnc(NS(C)(=O)=O)nc21 CN(Cc1ccc(O)c(N2CC(=O)NS2(=O)=O)c1F)[C@@H]1C[C@@H]2CCCCN2[C@H](c2ccc(C#N)cc2)N1 COCC[C@@H](C)Nc1ccc2c(n1)N(c1ccc(-c3ccc(O)c(N4CC(=O)NS4(=O)=O)c3F)cc1)CCC2 CS(=O)(=O)N[C@@H]1CC[C@H]2CCN(c3ccccc3-c3ccc(O)c(N4CC(=O)NS4(=O)=O)c3F)C[C@@H]21 NC(=O)c1cnc2c(c1)[C…	c1n[nH]c([C@H](CCC2)c3c2oc(C(C)=O)c3C)c1 c(cc1)cc(C)c1N(CCC1)c2c1cnc(NS(C)(=O)=O)n2 CN(C)[C@H]1N[C@@H](c(cc2)ccc2C#N)N(CCCC2)[C@@H]2C1 c(cc1)ccc1N1c2ncccc2CCC1 c(cccc1)c1N(CC[C@@H]1CC2)C[C@@H]1[C@@H]2NS(C)(=O)=O c1cnc([C@H]2c3cc(C(N)=O)cnc3CCC2)cc1 c1cc(OCCC2c3n[nH]cc3)c2cc1 CC[C@@](C1)(c2cccc(F)c2N1[C@@H]1NNCCC1)O CCCN[C@H](CCC1)N(C2)[C@H]1CCN2c1ncccc1	Nc1cccc(OC2)c1NC2c1ncccc1	BB 31	Buchwald reaction	Amine	70
O=C1CN(c2c(O)ccc(-c3ccc4c(c3)[C@@H]3CC[C@H](Nc5ccnc(N6CCCC6)n5)[C@H]4CC3)c2F)S(=O)(=O)N1	c1cc(C2CCCC3CC2)c3cc1					71
O=C1CN(c2c(O)ccc([C@H]3CNN[C@H](N4CC[C@]5(CCCN5)[C@@H]4c4cccc(F)c4)C3)c2F)S(=O)(=O)N1	[C@H](C1)CNN[C@@H]1N(CC[C@@]12NCCC2)[C@H]1c1cccc(F)c1					72
C[C@H](Cc1ccc(O)c(N2CC(=O)NS2(=O)=O)c1F)S(=O)(=O)N[C@H](C)C1CCN(c2ccccc2)CC1 C[C@H](CNCc1cccc(-c2ccn[nH]2)n1)Cc1ccc(O)c(N2CC(=O)NS2(=O)=O)c1F Cc1ccccc1NC(=O)C[C@@]1(F)C[C@H]1c1nn(C2CC2)cc1-c1ccc(O)c(N2CC(=O)NS2(=O)=O)c1F Cc1ccccc1NC(=O)C[C@]1(F)C[C@@H]1c1cc(-c2ccc(O)c(N3CC(=O)NS3(=O)=O)c2F)n(C)n1 Cn1nc([C@@H]2C[C@]2(C)CNS(=O)(=O)CC(F)(F)F)cc1-c1ccc(O)c(N2CC(=O)NS2(=O)=O)c1F CO[C@@H](COc1cccc([C@@…	C[C@@H](C)S(N[C@H](C)C(CC1)CCN1c1ccccc1)(=O)=O C[C@H](C)CNCc1cccc(-c2ccn[nH]2)n1 c1c[nH]nc1C(C1)C1(CC=O)F c1cc(C(C2)C2(CC=O)F)nn1C c1cc([C@H]2[C@@](C)(CNS(CC(F)(F)F)(=O)=O)C2)nn1C C[C@H](COc1cc([C@H](CC2)CN[C@@]2(C#N)N)ccc1)OC c1cc(C(C2)C2(CC=O)F)n[nH]1	NCCCCCNC1(CCCCC1)c1ccccc1	BB 88	Buchwald reaction	Amine	74
Nc1nccn1C[C@H]1CCC[C@@H]2[C@@H]3CC[C@@H](c4ccc(O)c(N5CC(=O)NS5(=O)=O)c4F)C[C@@H]3N[C@H]12	[C@H]1C[C@@H]2N[C@@H]3[C@@H](Cn4c(N)ncc4)CCC[C@@H]3[C@@H]2CC1					75
C[C@@]1(NC(=O)[C@@H]2C[C@H]2c2ccccc2)CN(c2ccccn2)[C@@H](c2ccc(O)c(N3CC(=O)NS3(=O)=O)c2F)[C@H]1F Cc1cc([C@H]2[C@H](C(F)(F)F)CCCN2C(=O)c2ccn(C3CCCCC3)n2)ccc1-c1ccc(O)c(N2CC(=O)NS2(=O)=O)c1F Cn1cccc1[C@@H]1C[C@H]1C(=O)Nc1nc(-c2ccc(O)c(N3CC(=O)NS3(=O)=O)c2F)c(C2CC2)[nH]1 Cn1nc(C2(NC(=O)[C@@H]3C[C@H]3c3ccccc3)CCC2)cc1-c1ccc(O)c(N2CC(=O)NS2(=O)=O)c1F NC(=O)c1cccc([C@@H]2C[C@@]2(Cc2cc(-c3ccc(O)c(N4CC(=O…	[C@@H]([C@H]([C@@](C)(C1)NC([C@H](C2)[C@@H]2c2ccccc2)=O)F)N1c1ncccc1 c1c(C)cc([C@@H]([C@@H](CCC2)C(F)(F)F)N2C(c2nn(C3CCCCC3)cc2)=O)cc1 c1c(C2CC2)[nH]c(NC([C@H](C2)[C@@H]2c2cccn2C)=O)n1 c1cc(C2(CCC2)NC([C@H](C2)[C@@H]2c2ccccc2)=O)nn1C c1cc(C[C@](C2)(C(F)F)[C@@H]2c2cc(C(N)=O)ccc2)nn1C1CC1 [C@H](C[C@H]1SC[C@@H](CCC2)N2c2ncccc2)[C@H]1c(cccc1)c1O [C@H](C[C@@H]1CN(CC2)[C@H]2c2cccc(F)c2)[C@@H]1[C@@H]1NN…
O=C(C[C@@]1(F)C[C@H]1c1cc[nH]n1)N[C@H]1C[C@@H]2c3ccccc3[C@H]1C[C@H]2c1ccc(O)c(N2CC(=O)NS2(=O)=O)c1F	[C@H](C[C@H]1[C@H](C2)NC(C[C@@](C3)([C@@H]3c3n[nH]cc3)F)=O)[C@H]2c2c1cccc2					77
Cc1ccncc1NC(=O)[C@@H]1CC2(CCC2)CN1c1ccc(-c2ccc(O)c(N3CC(=O)NS3(=O)=O)c2F)cc1 N[C@@H]1CC[C@]2(CCCN(c3cc[nH]n3)C2)[C@@H]1CNCCc1ccc(O)c(N2CC(=O)NS2(=O)=O)c1F O=C1CN(c2c(O)ccc(COC[C@H]3C[C@]4(CCN(c5cc[nH]n5)C4)N3)c2F)S(=O)(=O)N1	c(cc1)ccc1N(CC1(CCC1)C1)C1C=O CCNC[C@H]([C@@H](CC1)N)[C@]1(CCC1)CN1c1n[nH]cc1 COC[C@@H](C1)N[C@]1(CC1)CN1c1n[nH]cc1	COc(cc(cc1)N2CCC3(CCNCC3)CC2)c1N	BB 5	Buchwald reaction	Amine	78
