# Supplementary material for: Evolving drug discovery using AI, automation, and ASMS through an integrated D-preMTA-MTA strategy for target-focused library exploration
Source: Research Square preprint supplement (doi:10.21203/rs.3.rs-3753964/v1), 2024-02-12
Supplement: Supplementary file 5 [file f23f4295ad6bbb8a0180579a.xlsx]

## Sheet: Sheet1
SMILES_of_AI_molecules	SMILES_of_Fragments	SMILES_of_BBs	NAME_of_BBs	REACT	REAGENT	FRAME_ID
O=C1CN(c2c(O)ccc(-c3cc(-c4ccccc4OC[C@H]4C[C@@H]5C[C@H]4N5)[nH]n3)c2F)S(=O)(=O)N1 O=C1CN(c2c(O)ccc(-c3cc(Cc4ccsn4)cc(OC[C@H]4C[C@H]5CC[C@@H]4N5)c3)c2F)S(=O)(=O)N1 O=C1CN(c2c(O)ccc(-c3ccc(N4CCC[C@H]4CN[C@@H]4C[C@H]5CC[C@@H](C4)O5)cc3)c2F)S(=O)(=O)N1 O=C1CN(c2c(O)ccc(-c3ccnc(Oc4ccccc4CN[C@H]4C[C@@H]5CC[C@H]4N5)c3)c2F)S(=O)(=O)N1	OC[C@H]1C[C@@H]2C[C@H]1N2 OC[C@H]1C[C@H]2CC[C@@H]1N2 N[C@@H]1C[C@H]2CC[C@@H](C1)O2 N[C@H]1C[C@@H]2CC[C@H]1N2	CC(C)(C1(C)CC2)C2(C(O)=O)OC1=O	BB 1158	Amide Coupling	Acid	1
		COC(C(CC1)(CC2)CC12C(O)=O)=O	BB 346
		OC(C1C(CC2)CC2C1)=O	BB 407
		OC(C1C(C2)C=CC2C1)=O	BB 438
		NC1(C(CC2)CC2C1)C(O)=O	BB 740
		OC(C1C(CC2)OC2C1)=O	BB 973
		OC(C1(C2)OCC2C1)=O	BB 291
		OC(C1)(C2)CCC12C(O)=O	BB 851
CC(=O)c1cc(N2[C@@H]3CC[C@H]2C[C@H](c2ccn[nH]2)C3)ccc1-c1ccc(O)c(N2CC(=O)NS2(=O)=O)c1F	c1cc([C@@H]2C[C@H]3CC[C@@H](C2)N3)[nH]n1	OC(C(C(CC1)C2)C1CN2c1nc(Br)cs1)=O	BB 102	Amide Coupling	Acid	2
CN[C@H]1C[C@H](c2ccc(O)c(N3CC(=O)NS3(=O)=O)c2F)[C@@H](N2CC[C@@]3(CC4CCC4)CCCN3C2)NN1	C1CC(C[C@]23CCCN2CNCC3)C1					3
N#Cc1ccc(-c2ccc(O)c(N3CC(=O)NS3(=O)=O)c2F)cc1NC(=O)C[C@]1(F)C[C@H]1COc1ccccc1	O=CC[C@]1(F)C[C@H]1COc1ccccc1	OC(C(C1)(CC1OCc1ccccc1)C(O)=O)=O	BB 968	Amide Coupling	Acid	4
C[C@](Cc1ccc(F)cc1)(N[C@H]1C[C@@H]1[C@H]1CCCN1c1ccccc1)c1ccc(O)c(N2CC(=O)NS2(=O)=O)c1F COc1cccc(C[C@@H](Cc2ccc(O)c(N3CC(=O)NS3(=O)=O)c2F)N[C@H]2C[C@@H]2[C@@H]2CCCN2c2ccccc2)c1 N#Cc1cc(COC2(c3ccn[nH]3)CN(C3CCCC3)C2)ccc1-c1ccc(O)c(N2CC(=O)NS2(=O)=O)c1F O=C1CN(c2c(O)ccc(-c3ccc(N4CCC[C@@H]4[C@H]4C[C@@H]4c4ccn[nH]4)cc3)c2F)S(=O)(=O)N1	N[C@H]1C[C@@H]1[C@H]1CCCN1c1ccccc1 N[C@H]1C[C@@H]1[C@@H]1CCCN1c1ccccc1 OC1(c2ccn[nH]2)CN(C2CCCC2)C1 c1cc([C@H]2C[C@@H]2[C@H]2CCCN2)[nH]n1					5
C[C@@]1(CNc2ccc(N)nc2)C[C@@H]1n1cc(-c2ccc(O)c(N3CC(=O)NS3(=O)=O)c2F)cn1 C[C@@H]1C[C@@H](Cn2cccn2)NN[C@@H]1N1CCC[C@H]1[C@@H]1CC[C@@H](c2ccc(O)c(N3CC(=O)NS3(=O)=O)c2F)O1 C[C@]1(C(=O)c2cn[nH]c2)CCCN1c1ccc(-c2ccc(O)c(N3CC(=O)NS3(=O)=O)c2F)cc1 C[C@]1(COCc2ccccc2)CCN1C(=O)c1cc(-c2ccc(O)c(N3CC(=O)NS3(=O)=O)c2F)n[nH]1 Cc1c(-c2ccc(O)c(N3CC(=O)NS3(=O)=O)c2F)cccc1S(=O)(=O)Nc1cccc(OC2CCCC2)n1 Cc1c(CO[C@H]2CC…	C[C@@]1(CNc2ccc(N)nc2)CC1 C[C@H]1CNN[C@H](Cn2cccn2)C1 C[C@]1(C(=O)c2cn[nH]c2)CCCN1 C[C@]1(COCc2ccccc2)CCN1 Nc1cccc(OC2CCCC2)n1 O[C@H]1CCC[C@@H]1CNc1ccccn1 OC[C@H]1CCCC[C@@H]1Nc1ccsn1 O[C@H]1C[C@H]1CNc1ccccn1 Cc1ccc(NC[C@@H]2CCCN2)nc1 Cc1cccc(O)c1NC1CC1 Cc1cccnc1NC(=O)[C@@H]1C[C@@H]1N Cc1ccnn1C[C@@H]1CCCC[C@H]1N CO[C@@H](c1ccccc1)[C@@H]1CC[C@@H]1N N#C[C@]1(Cn2cccn2)CC[C@H]1N C1CN[C@@H](CNC2CC2)C1 …	OC(c(ccc(OCc1ccccc1)c1)c1F)=O	BB 1006	Amide Coupling	Acid	6
		OC(C1(COCc2ccccc2)CCNCC1)=O	BB 1011
		OC(c(cc1)ccc1Oc1cc(O)ccc1)=O	BB 1020
		Cc(cc1)ccc1S(N(CC1)C1C(O)=O)(=O)=O	BB 1040
		NC1(CCN(Cc2ccccc2)CC1)C(O)=O	BB 1078
		Nc(ccc(C(O)=O)c1)c1NCC1OCC1	BB 1118
		OC(C(CC1)CCN1C(C1CC1)=O)=O	BB 1127
		OC(c(cc1)nnc1NC1CC1)=O	BB 1163
		OC(c1c(Cc2ccccc2)cccc1)=O	BB 1183
		OC(c(cc1)cnc1Oc1ccccc1)=O	BB 1186
		Cc(cc(cc1)Oc2ccccc2)c1C(O)=O	BB 1207
		OC(c1ccc(CC2CCNCC2)cc1)=O	BB 1220
		OC(COc(cc1)ccc1C(c1ccccc1)=O)=O	BB 1236
		COc(cc1)ccc1Oc(cc1)ccc1C(O)=O	BB 1246
		OC(c1c(COc2cccc(F)c2)cccc1)=O	BB 1253
		OC(c(cc1)ccc1C#Cc1ccccc1)=O	BB 1258
		OC(Cc(cc(cc1)Cl)c1Oc1ccccc1)=O	BB 1268
		COc(c(F)c1NCc2ccccc2)c(C(O)=O)c(OC)c1F	BB 1270
		CN1CCN(Cc(cccc2)c2C(O)=O)CC1	BB 1271
		OC(c(cc1)ccc1OCc1cccc(Cl)c1)=O	BB 1303
		OC(Cc1cc(OCc2ccccc2)ccc1)=O	BB 1318
		COc(ccc(CCC(c1cccc(OCC(O)=O)c1)O)c1)c1OC	BB 14
		OC(C1(Cc2ccccc2)CNCC1)=O	BB 140
		Cc(nc(cc1)OCc2ccccc2)c1C(O)=O	BB 15
		NC(Cc(cc1)ccc1Oc1cnccc1)C(O)=O	BB 150
		COc1ccc(COc(c(OC)c2)cc([N+]([O-])=O)c2C(O)=O)cc1	BB 18
		NC(Cc(cc1)ccc1OCCCCC1CCNCC1)C(O)=O	BB 187
		OC(C(COC1)N(Cc2ccccc2)C1=O)=O	BB 189
		OC(Cc1cccc(C(c2ccccc2)=O)c1)=O	BB 19
		NC(Nc(cc1)ccc1C(Oc1ccc(CC(O)=O)cc1)=O)=N	BB 2
		Cc(cc1)ccc1S(Nc(cc1)ccc1C(O)=O)(=O)=O	BB 23
		OC(CC(C1CC1)c1cc(Cl)ncc1)=O	BB 24
		OC(C(C1)CN(Cc2ccccc2)C1=O)=O	BB 266
		OC(C1CCCCC1)(C(O)=O)c1ccccc1	BB 270
		OC(c1cc(C(F)(F)F)c(CN2CCOCC2)cc1)=O	BB 29
		OC(c(cc1)ccc1C(/C=C/c1ccccc1)=O)=O	BB 3
		[O-][N+](c(ccc(Oc(ccc(Cl)c1)c1Cl)c1)c1C(O)=O)=O	BB 312
		OC(C(CCC1)C1C(c1ccccc1)=O)=O	BB 332
		OC(C1NCC(Cc(cc2)ccc2Br)C1)=O	BB 355
		OC1(CCCC1)C(C(O)=O)c1ccccc1	BB 361
		OC(c(cccc1)c1C(c1ccccc1)=O)=O	BB 374
		OC(C1)(CC1OCc1ccccc1)C(O)=O	BB 403
		OC(c(cccc1)c1OCC1OCCCC1)=O	BB 435
		OC(c1n[nH]c(Cc2ccccc2)n1)=O	BB 461
		[O-][N+](c1ccc(C(c2nocc2C(O)=O)O)cc1)=O	BB 482
		OC(c1cc(OCc2ccccc2)cc(O)c1)=O	BB 5
		OC(C(c1ccccc1)NCC(O)=O)c1ccccc1	BB 525
		COc1nc(Sc2cccc(Cl)c2C(O)=O)nc(OC)c1	BB 530
		OC(c(cc1)ccc1OCc(cc1)ccc1Cl)=O	BB 56
		OC(C1)CON1C(c(cccc1)c1C(O)=O)=O	BB 571
		OC(C(c(cccc1)c1Cl)NCCc1cccs1)=O	BB 598
		CC(c1cccc(NC(Cc(cccc2)c2C(O)=O)=O)c1)O	BB 625
		OC(C1(CC1)C(Nc(cc1)ccc1F)=O)=O	BB 642
		OC(c(cccc1)c1Nc(cc1)ccc1F)=O	BB 650
		OC(c(cn1)c(NC2CC2)nc1Cl)=O	BB 652
		OC(c1c(Nc2ccccc2)nccc1)=O	BB 656
		OC(c1ncc(Cc2ccccc2)[nH]1)=O	BB 679
		OC(c1ccc(CNCc2ccccc2)cc1)=O	BB 68
		OC(c(ccc(Cl)c1)c1NC(C1CC1)=O)=O	BB 719
		Cc(cc(cc1)C#CC2CC2)c1C(O)=O	BB 72
		Nc(cccc1)c1C(c(cccc1)c1C(O)=O)=O	BB 729
		OC(c(cc(cc1)F)c1NC(C1CC1)=O)=O	BB 736
		OC(C(CCCC1)N1S(c1ccccc1)(=O)=O)=O	BB 84
		OC(c1ccnn1Cc1cnccc1)=O	BB 876
		OC(C1(Cc2ccccc2)CNCCC1)=O	BB 921
		OC(c1cn(Cc2ccccc2)nn1)=O	BB 928
		OC(C(C1)CN(Cc2ncccc2)C1=O)=O	BB 93
		COc1ccc(Cn2nc(C(O)=O)c(Br)c2)cc1	BB 952
		OC(c1cn(Cc2ccccc2)nc1)=O	BB 975
C[C@@H](Cc1ccc(O)c(N2CC(=O)NS2(=O)=O)c1F)c1cccc(S(=O)(=O)Nc2ccsn2)n1 C[C@@H](Cc1cccc(C(N)=O)c1)Cn1ccc(-c2ccc(O)c(N3CC(=O)NS3(=O)=O)c2F)n1 C[C@@H](CNc1cccc(CCNc2ccccn2)n1)Cc1ccc(O)c(N2CC(=O)NS2(=O)=O)c1F C[C@@H](COC[C@H]1NN[C@H]1C)Cc1ccc(-c2ccc(O)c(N3CC(=O)NS3(=O)=O)c2F)cc1 C[C@@H](NC[C@H]1CCCN1[C@@H]1CCCN(c2ccc(O)c(N3CC(=O)NS3(=O)=O)c2F)N1)[C@H](F)Cc1cccc(C(F)F)c1 C[C@@H](OCc1ccc(O)c(N2CC(=O)NS2(…	Nc1ccsn1 CC(C)Cc1cccc(C(N)=O)c1 Nc1ccccn1 C[C@@H]1NN[C@@H]1CO C[C@@H](N)[C@H](F)Cc1cccc(C(F)F)c1 Nc1cncs1 C[C@@H]1[C@@H](C(=O)CN)[C@H](C)N[C@@H]1C N#Cc1ccccc1NC(=O)O C[C@@H]1CC[C@H](N)NN1 NC(=O)c1cccc(O)c1 C[C@H]1CCN[C@@H]1C C[C@H]1CC[C@@H](O)NN1 C[C@H]1CC[C@H](N)CC1 C[C@H]1CCCNC1 C[C@H]1NN[C@@H](N)S1 CCNc1cncs1 CC(=O)c1ccccc1N CC(=O)Cc1ccc(C#N)c(N)c1 CC(=O)Nc1cccc(CN)n1 CC(C)(C#N)c1ccc([SH](=O)=…	OC(c(cc1)c(C(F)(F)F)cc1F)=O	BB 1000	Amide Coupling	Acid	7
		CC(c1cc(C(O)=O)ncc1)=O	BB 1001
		CC(c1cccc(C(O)=O)c1)=O	BB 1003
		Cc1noc(C(O)=O)c1	BB 1004
		CCc1ccc(C(O)=O)s1	BB 1007
		Cc1cnc(C(O)=O)c(N)c1	BB 1008
		Cc1ccc(C(O)=O)c(F)c1F	BB 1010
		Cc1csc(N)c1C(O)=O	BB 1014
		CC(C)c(cc1)ccc1OCC(O)=O	BB 1015
		Cc(c(C(O)=O)cc(Br)c1)c1F	BB 1016
		Cn(cc1C(O)=O)nc1Cl	BB 1017
		Cn1nc(C(F)(F)F)c(C(O)=O)c1	BB 1019
		Nc(cc1)ccc1C(O)=O	BB 1022
		NC(c(cc1)ccc1C(O)=O)=S	BB 1023
		CCCCc1ccc(C(C)C(O)=O)cc1	BB 1024
		Cc1c(C(O)=O)ncnc1Cl	BB 1025
		CS(c(cc1)cc(C(O)=O)c1F)(=O)=O	BB 1030
		CC1N(CC(O)=O)CCNC1	BB 1031
		Cc1c(C(O)=O)nc(N)s1	BB 1033
		CCn(c(C)c1)nc1C(O)=O	BB 1034
		OC(c(ncc(Cl)c1)c1Cl)=O	BB 1035
		COc(nccc1C(O)=O)c1F	BB 1036
		Nc(cc1)cc(C(O)=O)c1[N+]([O-])=O	BB 1039
		CC(C)c(cc(c(C(O)=O)c1)N)c1Br	BB 1042
		N#Cc(ccc(C(O)=O)c1)c1Br	BB 1043
		COc(c(C(O)=O)c1F)ccc1F	BB 1045
		OC(c(cnc(Br)c1)c1I)=O	BB 1046
		Cc(cc(C(O)=O)nc1)c1Br	BB 1048
		OC(Cc(c(Cl)cnc1)c1Cl)=O	BB 1049
		OC(c1cc(F)cc(Cl)c1Cl)=O	BB 105
		Cc(cc1)c(C)nc1C(O)=O	BB 1050
		Cc1cc(C(O)=O)n[nH]1	BB 1051
		CC(c(ccc(C(O)=O)c1)c1O)=O	BB 1052
		CC(C)(C(O)=O)c(cc1)ccc1Cl	BB 1054
		Cc1ncc(C(O)=O)s1	BB 1055
		COc1ccnc(C(O)=O)c1Br	BB 1059
		OC(c1ccc(C(F)(F)F)s1)=O	BB 1061
		OC(c(scc1Br)c1F)=O	BB 1063
		CCOc(cccc1)c1OCC(O)=O	BB 1064
		OC(c1cc(Cl)ncc1)=O	BB 1067
		Cc1c(C(O)=O)scn1	BB 1068
		OC(c(c(F)c1)cc(Cl)c1F)=O	BB 107
		COc(cc(cc1C(O)=O)Br)c1N	BB 1071
		OC(c1cc(F)cc(F)c1F)=O	BB 1073
		COc1ccc(CC(O)=O)c(I)c1OC	BB 1075
		OC(c(cc1)cc(I)c1OC(F)F)=O	BB 1076
		CC(C)(C)c1cc(C(O)=O)n[nH]1	BB 108
		OC(Cc(c(F)cc(Br)c1F)c1F)=O	BB 1082
		CC(C)c1ccc(CCC(O)=O)cc1	BB 1084
		Cc1c(C(O)=O)sc(O)n1	BB 1085
		OC(c(ncc(F)c1)c1Cl)=O	BB 1087
		Cc1cc(O)cnc1C(O)=O	BB 1088
		Nc1cc(C(O)=O)nc(C(F)(F)F)n1	BB 109
		CC(C)c1c(C(O)=O)sc(N)n1	BB 1090
		NC(C(O)=O)c(ccc(Cl)c1)c1Cl	BB 1093
		Nc(ccc(C(O)=O)c1)c1[N+]([O-])=O	BB 11
		Nc1c(C(F)(F)F)cnc(C(O)=O)c1	BB 1104
		OC(c(o1)cc(Br)c1Br)=O	BB 1106
		Cc(ccc(C(O)=O)c1)c1N	BB 1107
		Cc(ccc(O)c1)c1C(O)=O	BB 1109
		Cc(c(F)c1C(O)=O)ccc1F	BB 1110
		Cc1cc(Br)cc(C)c1OCC(O)=O	BB 1112
		OC(Cc(cc1F)cc(F)c1F)=O	BB 1113
		Cc(cc1)cc(F)c1C(O)=O	BB 1116
		C=CCOc1ccc(CC(C(O)=O)N)cc1	BB 1117
		Cc1nccc(C(O)=O)c1[N+]([O-])=O	BB 112
		OC(c(c(F)c(cc1)S(Cl)(=O)=O)c1F)=O	BB 1120
		OC(c(ccnc1C(F)(F)F)c1Cl)=O	BB 1123
		CC(C)COc1cccc(C(O)=O)c1	BB 1124
		Cc1ccc(CC(C(O)=O)N)cc1	BB 1125
		Cc(c(F)c(cc1)C(O)=O)c1F	BB 1126
		Nc(c(F)c(cc1)Br)c1C(O)=O	BB 1129
		Nc(nc1)ncc1C(O)=O	BB 1130
		OC(CN1CCNCC1)=O	BB 1133
		OC(c1cnc(C(F)(F)F)s1)=O	BB 1134
		Nc([nH]cc1)c1C(O)=O	BB 1135
		Nc(c(C(O)=O)c1)cc(Cl)c1S(N)(=O)=O	BB 1138
		[O-][N+](c(cc(CCC(O)=O)cc1)c1F)=O	BB 114
		OC(c(cc(C(F)(F)F)cc1)c1Br)=O	BB 1141
		OC(c(c(F)cc(F)c1)c1Cl)=O	BB 1143
		Nc(cc1)cc(C(O)=O)c1N	BB 1146
		OC(Cc(c(F)c(c(F)c1F)F)c1F)=O	BB 1147
		[O-][N+](c(c(C(O)=O)c(c(Cl)c1F)F)c1F)=O	BB 115
		NCc(cc1)nnc1C(O)=O	BB 1150
		[O-][N+](c(cc1)cc(Cl)c1OCC(O)=O)=O	BB 1154
		[O-][N+](c1cc(Cl)cc([N+]([O-])=O)c1C(O)=O)=O	BB 1156
		CC(C)(C)c(cc1)cc(C(O)=O)c1OC	BB 1157
		Cc(cc(CC(O)=O)cc1)c1N	BB 1159
		OC(c(nc1C(F)(F)F)cnc1Cl)=O	BB 1160
		COc1cc(C(O)=O)cc(F)c1F	BB 1162
		CCCc1cc(C(O)=O)n[nH]1	BB 1164
		OC(c1ncc(C(F)(F)F)cc1)=O	BB 1166
		CC(c(cc1)cc(F)c1C(O)=O)=O	BB 1171
		Cc(cc(cc1)C(O)=O)c1S(F)(=O)=O	BB 1172
		[O-][N+](c(c(C(O)=O)ccc1)c1Br)=O	BB 1175
		COc1cc(C(C(O)=O)N)cc(OC)c1OC	BB 1177
		CC(C)(C)c1cc(C(O)=O)no1	BB 1178
		OC(c(c(Cl)c1Cl)nnc1Cl)=O	BB 118
		Cc1cscc1C(O)=O	BB 1182
		CC(OCc1ccc(C(O)=O)o1)=O	BB 1184
		COc(cc(C(F)(F)F)cc1)c1C(O)=O	BB 1185
		OC(c(cc(cc1)S(Cl)(=O)=O)c1Cl)=O	BB 1187
		Nc1ccc(C(O)=O)c(Cl)n1	BB 1188
		Cc(c(C(O)=O)c1)cc(OC)c1Br	BB 1189
		COc(c(CCC(O)=O)ccc1)c1F	BB 119
		OC(c(c(F)ccc1C(F)(F)F)c1F)=O	BB 1191
		Cc(cc1)ccc1C#CC(O)=O	BB 1193
		OC(c(cc1Cl)cc(Cl)c1O)=O	BB 1194
		Cc1cc(C(O)=O)cnc1CO	BB 1195
		CC(C)Oc(cc(cc1)C(O)=O)c1O	BB 1196
		Nc(c(Cl)c1)cc(C(O)=O)c1Br	BB 1200
		OC(c1cccc(Br)c1Cl)=O	BB 1202
		Cc(c(C(O)=O)c(nc1)Cl)c1Br	BB 1203
		OC(c1cc(Cl)cc(F)c1Cl)=O	BB 1204
		[O-][N+](c1c(C(O)=O)nccc1O)=O	BB 1205
		CNC(CC1)CCC1C(O)=O	BB 1209
		CC1OC(C)CC(CC(O)=O)C1	BB 121
		OC(c(cc1)ccc1F)=O	BB 1210
		OC(c1cccc(S(F)(=O)=O)c1)=O	BB 1214
		OC(c1cc(Cl)ncc1F)=O	BB 1216
		CC(C)(C)n(cc1)cc1C(O)=O	BB 1217
		Cc(c(O)cc(OC)c1)c1C(O)=O	BB 1219
		COc(cc1)cc(CCC(O)=O)c1Br	BB 1221
		[O-][N+](c1ccc(CC(O)=O)cc1)=O	BB 1224
		OC(Cc(ccc(O)c1)c1Br)=O	BB 1226
		CC(C)c(cc1)cc(F)c1C(O)=O	BB 1227
		CC(c(cc(cc1)C(O)=O)c1N)=O	BB 1228
		CC(c1ccc(CCC(O)=O)cc1)=O	BB 1229
		OC(c1cc(Cl)cc(OC(F)(F)F)c1)=O	BB 1230
		COc(ccc(Cl)c1CC(O)=O)c1F	BB 1233
		CC(C(O)=O)c1cc(C)ccc1	BB 1234
		CC(C)(c(cc1)cc(F)c1C(O)=O)O	BB 1235
		N#Cc(cccc1C(O)=O)c1F	BB 1237
		CCNc(ncc(C(O)=O)c1)c1[N+]([O-])=O	BB 1238
		[O-][N+](c1cc(C(O)=O)cc(Cl)c1)=O	BB 1239
		CCOc(cccc1C(O)=O)c1F	BB 1242
		NC(Cc1ccc(C(F)F)cc1)C(O)=O	BB 1243
		CC(C)C(Nc(cc1)ccc1C(O)=O)=O	BB 1248
		CCCCc1cccc(C(O)=O)c1	BB 1257
		N#Cc(cc1C(O)=O)cc(Br)c1Cl	BB 1263
		CN(C)c1nccc(C(O)=O)c1	BB 1267
		Cc(c(OC)ccc1)c1C(O)=O	BB 1269
		CC(C)(C1)CN(C)C1C(O)=O	BB 1273
		OC(c(cc1Cl)cc(Cl)c1F)=O	BB 1274
		[O-][N+](c(cc1)c(C(F)(F)F)cc1C(O)=O)=O	BB 1278
		CC1(C)NCCC(CC(O)=O)C1	BB 128
		COc(cc1)c(CCC(O)=O)cc1Br	BB 1287
		OC(c(ccc(Cl)c1)c1I)=O	BB 1292
		Cc(c(C(O)=O)c1)ncc1[N+]([O-])=O	BB 1298
		CC(C)(C)c1cccc(C(O)=O)c1	BB 1299
		OC(c1c(C(F)(F)F)ccs1)=O	BB 130
		OC(C#Cc1ccncc1)=O	BB 1300
		Nc1nc(Cl)c(C(O)=O)nc1Br	BB 131
		Cc(c(Br)cc(C(O)=O)c1)c1Br	BB 1310
		N#Cc(c(Cl)c(cc1F)C(O)=O)c1Cl	BB 1311
		CC(C)(C)c(cccc1)c1C(O)=O	BB 1313
		[O-][N+](c(cc1)c(CCC(O)=O)cc1Cl)=O	BB 1314
		CC(c(c(O)c1)cc(C(O)=O)c1N)=O	BB 133
		OC(c(ncc(C(F)(F)F)c1)c1F)=O	BB 134
		Cc(cc(cc1)O)c1OCC(O)=O	BB 136
		Nc(c(C(O)=O)cc(C(F)(F)F)c1)c1Cl	BB 141
		Nc1cc(Cl)c(CC(O)=O)cc1	BB 142
		CC(C)c(ccc(C(O)=O)c1)c1I	BB 143
		CC(C)(CNCC1)C1C(O)=O	BB 144
		[O-][N+](c(cc1)cc(C(O)=O)c1Cl)=O	BB 151
		Cc1cccc(C(O)=O)c1Br	BB 156
		COc(cc1)cc(C(O)=O)c1F	BB 159
		[O-][N+](c(cc(cc1C(O)=O)F)c1F)=O	BB 16
		CC(C)CN(CC1)CCC1C(O)=O	BB 160
		OC(CCc1cccc(Cl)c1Cl)=O	BB 164
		COc(nc(cc1)N)c1C(O)=O	BB 165
		Nc(ccc(C(O)=O)c1)c1I	BB 166
		Cc1csc(C(O)=O)c1C	BB 168
		OC(c(cc1)cc(Br)c1OC(F)(F)F)=O	BB 170
		[O-][N+](c1csc(C(O)=O)c1)=O	BB 171
		OC(c1cc(Cl)c(C(F)(F)F)cc1F)=O	BB 172
		OC(c(cc(C(F)(F)F)cc1)c1Cl)=O	BB 175
		C#Cc1c(CC(O)=O)cccc1	BB 177
		Nc(cc(c(C(O)=O)c1)F)c1F	BB 180
		Cc(ccc(C(O)=O)c1)c1O	BB 183
		Cc(c(CC(O)=O)ccc1)c1I	BB 184
		NC(CCNC1)C1C(O)=O	BB 185
		Cc(c(OCC(O)=O)c(nc1Br)[N+]([O-])=O)c1F	BB 188
		NC(C(O)=O)c1c(C(F)(F)F)cccc1	BB 191
		OC(Cc(cccc1)c1I)=O	BB 194
		OC(Cc1cc(Cl)ncc1)=O	BB 195
		Cc(nc(N)nc1)c1C(O)=O	BB 196
		CC(C)(C)n1ncc(C(O)=O)c1	BB 197
		OC(c(cc1C(F)(F)F)cc(F)c1F)=O	BB 20
		Cc(cc(C(C(O)=O)(F)F)cc1)c1F	BB 200
		OC(c(cc1)ccc1NC(C(F)(F)F)=O)=O	BB 202
		CC(Nc(cc(c(C(O)=O)c1)OC)c1I)=O	BB 208
		OC(C(c1cc(Cl)ccc1)Br)=O	BB 21
		NC(C(O)=O)c1cccc(Br)c1	BB 211
		NS(c(cc1)cc(C(O)=O)c1Br)(=O)=O	BB 213
		CC(c(cc1)ccc1C(O)=O)(F)F	BB 217
		N#Cc(cc1)cc(C(O)=O)c1O	BB 219
		COc(cc1)c(CC(O)=O)cc1[N+]([O-])=O	BB 22
		[O-][N+](c(cc1)ccc1C(O)=O)=O	BB 222
		COc(cc(c(C(O)=O)c1)F)c1Br	BB 224
		OC(Cc1cccc(Cl)c1F)=O	BB 232
		OC(c(c(Cl)c(cc1)Br)c1Cl)=O	BB 233
		COc(ccc(F)c1C(O)=O)c1OC	BB 234
		Cc1ncc(C(O)=O)c(C(F)(F)F)n1	BB 236
		COc(cc(c(OC)c1)OC)c1C(O)=O	BB 237
		COc1cc(C(O)=O)ncc1OC	BB 238
		Cc(c(C(O)=O)c1)ncc1Cl	BB 248
		[O-][N+](c1c(C(F)(F)F)ccc(C(O)=O)c1)=O	BB 250
		CC(c(cc1)cc(C(O)=O)c1Br)=O	BB 252
		OC(c(cc(C(F)(F)F)nc1)c1Br)=O	BB 253
		Cc1cccc(CC(O)=O)c1C	BB 254
		OC(c(cc1)cc(Br)c1Cl)=O	BB 255
		[O-][N+](c1n[nH]cc1C(O)=O)=O	BB 256
		Cc1cncc(C(O)=O)n1	BB 258
		OC(c(cc1F)cnc1Cl)=O	BB 261
		OC(c(cnc(Cl)c1Br)c1Cl)=O	BB 263
		[O-][N+](c1c(CC(O)=O)ccc(F)c1)=O	BB 264
		COc1cccc(I)c1C(O)=O	BB 265
		Cc(nc(c(C(O)=O)c1)Cl)c1Br	BB 271
		OC(c(ccnc1I)c1F)=O	BB 277
		CS(c1cncc(C(O)=O)c1)(=O)=O	BB 278
		OC(c(c(F)c(c(Br)c1F)F)c1F)=O	BB 28
		OC(Cc(cc1)ccc1SC(F)(F)F)=O	BB 283
		NC(Cc(cc1)cc(Br)c1O)C(O)=O	BB 286
		OC(C(c(cccc1)c1OC(F)(F)F)(F)F)=O	BB 287
		CC(C)(Cc1cccc(Br)c1)C(O)=O	BB 288
		OC(C(C1)CNCC1(F)F)=O	BB 289
		OC(COc1ccc(C(F)(F)F)cc1)=O	BB 290
		Cc1cc(C(O)=O)co1	BB 293
		OC(c(c(F)c1)ncc1Cl)=O	BB 294
		[O-][N+](c1cccc(Br)c1CC(O)=O)=O	BB 30
		Cn1nccc1CCC(O)=O	BB 302
		Cn(c(Br)c1)nc1C(O)=O	BB 303
		Cc1ccc(C(C(O)=O)F)cc1	BB 304
		CCOc1nccc(C(O)=O)c1	BB 305
		Cc(n(C)nc1)c1C(O)=O	BB 306
		CC(C)c1ccc(CC(C(O)=O)N)cc1	BB 307
		Nc(nc1)cc(Br)c1C(O)=O	BB 308
		NC(c(cc1)ccc1C(O)=O)=O	BB 310
		CC(C)n1nc(C)cc1C(O)=O	BB 311
		NC(C(O)=O)c(c(Cl)ccc1)c1Cl	BB 316
		OC(Cc(occ1)c1Cl)=O	BB 318
		Cc(cncc1)c1C(O)=O	BB 319
		CC(CC(C)C1)CC1C(O)=O	BB 32
		OC(c1cc(Cl)cnn1)=O	BB 320
		OC(c(cc1)cnc1Cl)=O	BB 321
		OC(c1nscc1I)=O	BB 322
		Cc1c(C(O)=O)c(C)nn1C	BB 323
		Cc1cc(C(O)=O)c[nH]1	BB 324
		C=CCOc1cccc(CC(C(O)=O)N)c1	BB 329
		CC(C)Cc1csc(N)c1C(O)=O	BB 330
		Nc(c(C(O)=O)ccc1F)c1F	BB 333
		Cc1c(C(O)=O)occ1	BB 339
		Cc1nc(C(O)=O)co1	BB 340
		CC(C)(C(O)=O)c(cccc1)c1[N+]([O-])=O	BB 342
		NCCc(cc1)ccc1OCC(O)=O	BB 343
		Cc1c(C(O)=O)oc(C)n1	BB 348
		Cc1cc(F)cc(CC(O)=O)c1	BB 35
		N#Cc1cccc(Br)c1C(O)=O	BB 350
		Nc(cc(cc1)C(O)=O)c1OC(F)(F)F	BB 353
		Nc(cc(C(O)=O)nc1)c1[N+]([O-])=O	BB 354
		CS(c1nc(C(O)=O)cc(Cl)n1)(=O)=O	BB 358
		CNc(ccc(C(O)=O)c1)c1I	BB 36
		OC(Cc(cc1)ncc1I)=O	BB 363
		CCn(cc1)nc1C(O)=O	BB 365
		Cn1ncc(Cl)c1C(O)=O	BB 367
		OC(CCC1CCC1)=O	BB 370
		COc(cc1)nc(OC)c1C(O)=O	BB 376
		OC(c1cccnc1Cl)=O	BB 378
		Cc1nnc(C(O)=O)o1	BB 379
		Nc(c([N+]([O-])=O)c(cc1)C(O)=O)c1Br	BB 38
		COc1cccc(CC(C(O)=O)N)c1OC	BB 383
		Cc1cccc(CC(C(O)=O)N)c1C	BB 384
		CC(c1cc(C(O)=O)n[nH]1)=O	BB 385
		NC(Cc1ccc(CP(O)(O)=O)cc1)C(O)=O	BB 387
		OC(Cc(s1)ccc1Cl)=O	BB 390
		COc1ncc(CC(O)=O)cc1	BB 393
		OC(C(C1)CC1(F)F)=O	BB 395
		OC(CC1)CCC1C(O)=O	BB 396
		CC(C)(C(O)=O)Oc1ncc(C(F)(F)F)cc1	BB 397
		COc(c(C(O)=O)ccc1)c1F	BB 398
		CC(C)=CCc(cc(cc1)C(O)=O)c1O	BB 4
		Nc1nnc(C(O)=O)o1	BB 400
		Cn1nc(CO)cc1C(O)=O	BB 408
		COc1c(CO)ccc(C(O)=O)c1	BB 41
		CC(C(O)=O)Oc(cccc1)c1F	BB 416
		COc(cc(cc1N)C(O)=O)c1Cl	BB 42
		Cc1cnc(CC(C(O)=O)N)cc1	BB 420
		COc1cc(Br)nc(C(O)=O)c1	BB 422
		OC(c(nc1Br)ccc1F)=O	BB 424
		Cc1nc(C(O)=O)cs1	BB 425
		OC(c1noc(Cl)c1)=O	BB 426
		Cc1c(C(O)=O)snn1	BB 427
		OC(c1cncnc1)=O	BB 429
		OC(c(cc(C(F)(F)F)cc1)c1O)=O	BB 431
		Nc(scc1)c1C(O)=O	BB 433
		Cn(c(C(O)=O)c1)nc1O	BB 434
		Cc(ccc(C(O)=O)c1)c1OC	BB 44
		OCCC(C1)C1C(O)=O	BB 441
		OC(c1cc(Cl)cnc1C(F)(F)F)=O	BB 443
		CCc1ccc(CC(C(O)=O)N)cc1	BB 445
		Cc1nocc1C(O)=O	BB 446
		OC(c1cnco1)=O	BB 447
		Cn1c(Cl)ncc1C(O)=O	BB 448
		COc1cc(F)c(C(C(O)=O)N)cc1	BB 450
		OC(c1cccc(OCC(F)(F)F)n1)=O	BB 451
		CC(C(O)=O)(c(cccc1)c1Cl)O	BB 452
		NCc1cc(C(O)=O)no1	BB 453
		Cc(nc(cc1)C(O)=O)c1F	BB 455
		OC(c1nccc(F)c1)=O	BB 456
		Cc(c(C(O)=O)c1)cc(Cl)c1[N+]([O-])=O	BB 46
		NS(c1ccc(C(O)=O)o1)(=O)=O	BB 463
		NCc1ccc(C(O)=O)s1	BB 464
		Cc(s1)c(CC(O)=O)nc1Br	BB 466
		OC(c1nc(Cl)cc(Cl)n1)=O	BB 467
		CC(C)c1csc(N)c1C(O)=O	BB 468
		Cc(onc1)c1C(O)=O	BB 469
		CC(C)(C(O)=O)Oc1ncc(C)cc1	BB 470
		NC(Cc(cc1)ncc1Cl)C(O)=O	BB 472
		NC1(CNCC1)C(O)=O	BB 474
		Cc1cc(Cl)ncc1C(O)=O	BB 475
		Cc1cc(O)c(C(O)=O)c(C)c1	BB 476
		OC(c1cc(F)cc(F)n1)=O	BB 477
		Cc1nc(C(O)=O)c(N)s1	BB 479
		COc(ccc([N+]([O-])=O)c1)c1C(O)=O	BB 483
		OC(C(C1)C1F)=O	BB 489
		Nc(ccc(CC(O)=O)c1)c1I	BB 49
		COc(nc1)cc(Cl)c1C(O)=O	BB 490
		Nc(cc1)c(CC(O)=O)cc1Br	BB 491
		COc1c(C(O)=O)c(Cl)ncc1	BB 495
		OC(CSc1ccccc1)=O	BB 496
		OC(c1nccs1)=O	BB 498
		CC1(CCCCC1)C(O)=O	BB 500
		NC(CC1)C1(C(O)=O)F	BB 501
		OCC(CCC1)CC1C(O)=O	BB 505
		OC(c(ccc(I)c1)c1O)=O	BB 507
		OC(c(nc(cc1)Cl)c1F)=O	BB 508
		[O-][N+](c(cc(cc1C(O)=O)Cl)c1F)=O	BB 51
		OC(C1CC1)=O	BB 510
		NCc1cc(C(O)=O)c(C(F)(F)F)cc1	BB 511
		CCOc1cc(Cl)ncc1C(O)=O	BB 512
		OC(c1nccc(C(F)F)c1)=O	BB 513
		OC(CCn1ncc(I)c1)=O	BB 514
		OC(C1CCCC1)=O	BB 516
		Cc(c(C(C(O)=O)O)ccc1)c1Cl	BB 517
		Cc1c(C(O)=O)c(Cl)ncn1	BB 520
		OC(c1cccc(Cl)n1)=O	BB 521
		CCC(C1)(CC1(C)C(O)=O)O	BB 523
		OC(C1NCC1(F)F)=O	BB 527
		NC(C1COCC1)C(O)=O	BB 531
		Nc(cc(CC(O)=O)cc1)c1O	BB 533
		COc1cc(N)c(C(O)=O)nc1Cl	BB 534
		OC(c1cccnc1OC(F)(F)F)=O	BB 536
		Cc1nc(CC(O)=O)cs1	BB 537
		Nc1nccc(C(O)=O)n1	BB 539
		Nc1nsnc1C(O)=O	BB 540
		OC(C1NCC1)=O	BB 541
		Cn(cc1C(O)=O)nc1N	BB 543
		OC(CCc1cc(O)ccc1)=O	BB 548
		Nc(nc1)c(C(O)=O)nc1Br	BB 549
		[O-][N+](c(ccc(I)c1)c1C(O)=O)=O	BB 55
		OC(CCc1nc(Cl)nc(Cl)c1)=O	BB 550
		Nc1cccc(CCC(O)=O)c1	BB 552
		CC(c(cc1)cc(C(O)=O)c1OC(C)=O)=O	BB 554
		NS(c(cccc1)c1C(O)=O)(=O)=O	BB 555
		CN(C)c1ncc(CC(O)=O)cc1	BB 556
		Cc1conc1C(O)=O	BB 557
		OC(C(O)=O)c1ccccc1	BB 558
		Nc1nonc1C(O)=O	BB 559
		Cc1cn(CC(O)=O)nc1	BB 560
		NC(Cc(ccc(F)c1)c1N)C(O)=O	BB 561
		NCC1C(CC(O)=O)C1	BB 563
		Cn1ncc(C(O)=O)c1N	BB 564
		OC(c(ccc(F)c1)c1O)=O	BB 565
		C=CC(C1)C1(C(O)=O)N	BB 567
		NC(C(O)=O)c1n[nH]nn1	BB 568
		OC(COc(ccc(Cl)c1)c1O)=O	BB 569
		OCc(cc(cc1)F)c1C(O)=O	BB 572
		Nc(nccc1)c1C(O)=O	BB 573
		CC(C)(C1)CC1(C(O)=O)N	BB 575
		COc1c(C(O)=O)nc(C(F)(F)F)cc1	BB 579
		NC1(COCC1)C(O)=O	BB 580
		OC(c([nH]1)nc(Br)c1Br)=O	BB 581
		CC(C1)CC1(C(O)=O)N	BB 582
		CC(Nc1nc(CC(O)=O)cs1)=O	BB 584
		CC(C1)CNC1C(O)=O	BB 586
		[O-][N+](c(cccc1C(O)=O)c1O)=O	BB 588
		NC(C(O)=O)c1cnccc1	BB 589
		OC(c(cccc1C(F)(F)F)c1F)=O	BB 59
		CC(N(CC(C1)O)C1C(O)=O)=O	BB 590
		NC1C(C(O)=O)NCC1	BB 591
		OC(c(cc(cc1)Br)c1O)=O	BB 593
		NC(Cc1cscn1)C(O)=O	BB 595
		[O-][N+](c(c(Cl)c1C(O)=O)ccc1Cl)=O	BB 60
		OC(Cc(cncn1)c1O)=O	BB 600
		OC(C1NCCNC1)=O	BB 601
		CC(C)c1n[nH]c(C(O)=O)c1	BB 604
		COc(ccnc1C(O)=O)c1N	BB 607
		OC(c([nH]cc1)c1Cl)=O	BB 611
		Cc(nc1)nc(O)c1C(O)=O	BB 612
		OC1(CCC1)C(O)=O	BB 613
		OC(c1cnc[nH]1)=O	BB 615
		Cc1c(C(O)=O)[nH]cc1	BB 617
		CS(c1cc(C(O)=O)cc(Br)c1)(=O)=O	BB 62
		OC1(CCOCC1)C(O)=O	BB 623
		OC1(CNC1)C(O)=O	BB 624
		OC(C(CC1)NCC1F)=O	BB 627
		Cc1c(C(O)=O)[nH]nc1C	BB 629
		OC(c1ncc[nH]1)=O	BB 633
		OC(c([nH]1)ccc1Br)=O	BB 634
		OC(CNc1cccc(Cl)c1)=O	BB 649
		CNc1cccc(OC)c1C(O)=O	BB 655
		OC(CNc(cccc1)c1Cl)=O	BB 673
		N#Cc1ncc(C(O)=O)[nH]1	BB 674
		OC(c1ncn[nH]1)=O	BB 678
		CC(Nc1cccc([N+]([O-])=O)c1C(O)=O)=O	BB 681
		CNc(c(C(O)=O)ccc1)c1F	BB 683
		OC(c1cnn[nH]1)=O	BB 690
		OC(c(ccnc1)c1O)=O	BB 692
		OC(C(C1)NCCC1(F)F)=O	BB 698
		CC(C)c(cc1)cc(CC(O)=O)c1OC	BB 7
		OC(Cn1nccn1)=O	BB 703
		NCc(nccc1)c1C(O)=O	BB 705
		OC(c1nnc[nH]1)=O	BB 706
		OC1(CCCC1)C(O)=O	BB 709
		[O-][N+](c(cncc1C(O)=O)c1O)=O	BB 712
		COc(cc(cc1C(O)=O)Br)c1O	BB 714
		OC(c([nH]1)cc(Cl)c1Cl)=O	BB 721
		Cc1c[nH]c(C(O)=O)c1C	BB 724
		CCCc1nc(C(C)(C)O)c(C(O)=O)[nH]1	BB 725
		COc(cc1)cc(O)c1C(O)=O	BB 727
		OC(c(nc(cc1)Br)c1O)=O	BB 728
		OC(C1)CNC1C(O)=O	BB 731
		OC(c(c(O)c1)cc(F)c1Br)=O	BB 732
		OC(c1ncnc(O)c1O)=O	BB 733
		COc(c(OC)c1)cc(C(O)=O)c1NS(C)(=O)=O	BB 735
		N#Cc1nn(CC(O)=O)cn1	BB 737
		COCc1c[nH]c(C(O)=O)c1	BB 739
		OC(c(cc1)cc(F)c1OC(F)(F)F)=O	BB 74
		CC1(C(O)=O)OCCC1	BB 743
		Cc(cc1)nc(O)c1C(O)=O	BB 744
		OC1(CCNCC1)C(O)=O	BB 745
		CCc1c(C(O)=O)[nH]c(C)n1	BB 747
		CC(C)(C1)CNC1C(O)=O	BB 748
		Cc(ccnc1C(O)=O)c1N	BB 749
		Cc(c(Cl)c(cc1)C(O)=O)c1Cl	BB 75
		CC(C1)NC1C(O)=O	BB 750
		NCc1cc(C(O)=O)cnc1	BB 751
		OC(c1cncnc1C(F)(F)F)=O	BB 753
		NC1(CCCCC1)C(O)=O	BB 756
		NS(c(cc(cc1)I)c1C(O)=O)(=O)=O	BB 757
		Nc1ncc(CC(O)=O)s1	BB 758
		Cc1ncc(C(O)=O)nc1Br	BB 759
		OC(c(ccc(O)c1)c1Cl)=O	BB 76
		OC(c1cc(F)cc(F)c1O)=O	BB 760
		CC(Oc(cc(C)cc1)c1C(O)=O)=O	BB 763
		Nc(cc1Cl)c(C(O)=O)nc1Br	BB 764
		OC(c(nc(nc1)Cl)c1Cl)=O	BB 766
		CC(C1)CC1C(O)=O	BB 769
		OC(Cc1cncc(Cl)n1)=O	BB 773
		Nc(cc1)c(C(O)=O)nc1Cl	BB 774
		Cc1nc(C)nn1CC(O)=O	BB 775
		OC(c(nnc(O)c1F)c1O)=O	BB 777
		COc(c(C(O)=O)c1)cnc1Br	BB 778
		Nc(c(I)nc(Cl)c1)c1C(O)=O	BB 782
		OC(c([nH]cc1)c1Br)=O	BB 783
		OC(c1cc(I)cnc1O)=O	BB 785
		Cc1c(C(O)=O)ncs1	BB 786
		OC(C1)CC1C(O)=O	BB 787
		OC(c(scc1)c1S(Cl)(=O)=O)=O	BB 788
		Cc1nn(C)c(C(O)=O)c1CN	BB 789
		OC(Cc1nc(Cl)nc(Cl)c1)=O	BB 790
		CC1(CC1)C(O)=O	BB 791
		CC(C)(C)OCc1n[nH]cc1C(O)=O	BB 792
		OC(c1nonc1)=O	BB 796
		Nc(c(Br)cc(C(O)=O)c1)c1Br	BB 8
		NC(Cc(cc1)ccc1O)C(O)=O	BB 801
		NC(COC1)C1C(O)=O	BB 804
		NC(Cc(c(F)ccc1)c1F)C(O)=O	BB 809
		Cn1c(C(O)=O)ncc1	BB 810
		OC(c1cncs1)=O	BB 812
		Nc1nc(C(O)=O)c[nH]1	BB 817
		Cc1c(C)sc(C(O)=O)c1O	BB 819
		OC(c(cc(cc1)Br)c1F)=O	BB 82
		OC(c1conc1)=O	BB 820
		Cc1cc(Br)cc(C(O)=O)c1O	BB 826
		Cc1ncc(C(O)=O)o1	BB 828
		OC(c(cc1)ncc1F)=O	BB 829
		[O-][N+](c1cc(C(O)=O)cc(OC(F)(F)F)c1)=O	BB 83
		Nc(c(C(O)=O)c(c(F)c1)Br)c1Cl	BB 831
		NC(CC(C1)CC1(F)F)C(O)=O	BB 833
		CC(C(O)=O)(c(cc1)ccc1Cl)O	BB 835
		[O-][N+](c1cccc(Cl)c1C(O)=O)=O	BB 841
		Nc(c(O)ccc1)c1C(O)=O	BB 844
		OC(c1nc(O)c(C(F)(F)F)cc1)=O	BB 845
		Cc(cn1)c(C(O)=O)nc1Cl	BB 846
		Cn1nnc(Br)c1C(O)=O	BB 847
		OC(Cc(c(F)ccc1)c1Br)=O	BB 85
		NCc1cccc([N+]([O-])=O)c1C(O)=O	BB 852
		COc1c(C(O)=O)c(N)cnc1	BB 853
		CC(Cc1ccccc1)(C(O)=O)N	BB 857
		CC(c(cccc1)c1C(O)=O)N	BB 863
		Nc(cc(cc1)C(O)=O)c1C#N	BB 865
		COc(ccc(CC(O)=O)c1)c1F	BB 866
		CC(Cc(cc1)ccc1O)(C(O)=O)N	BB 867
		OC(c1cc(Cl)nnc1)=O	BB 869
		CC(CC1)N(C)C1C(O)=O	BB 870
		Cn1cnc(C(O)=O)c1	BB 871
		CC(C1)C1C(O)=O	BB 872
		Nc(c(C(O)=O)c1)cnc1Br	BB 873
		Nc(cc1)cc(S(N)(=O)=O)c1C(O)=O	BB 878
		Cc1cc(C(O)=O)cc(C#N)c1	BB 88
		Nc1nc(C(O)=O)no1	BB 880
		Cc1csc(C(O)=O)n1	BB 881
		OC(c(c(F)n1)ccc1F)=O	BB 882
		NC(C(O)=O)c1cc(F)c(C(F)(F)F)cc1	BB 883
		Cc1nc(C(O)=O)cnc1Cl	BB 884
		Cc1ccnnc1C(O)=O	BB 885
		OC(c(n(CC(F)(F)F)nc1)c1Br)=O	BB 886
		CCc1cccc(C(O)=O)c1N	BB 891
		Cc1coc(C(O)=O)n1	BB 895
		OC(CC(C1)CC1(F)F)=O	BB 896
		Cc1c(C(O)=O)nc(C)o1	BB 897
		Cn(cc1)nc1C(O)=O	BB 898
		Cc1cn(C)nc1C(O)=O	BB 899
		COc(c(C(O)=O)c1)ncc1[N+]([O-])=O	BB 900
		Cn(c(Br)c1C(O)=O)nc1Br	BB 902
		N#Cc(cc1)ncc1C(O)=O	BB 903
		CC(C)c1ccc(C(C(O)=O)N)cc1	BB 908
		COc(ncc(C(O)=O)c1)c1Cl	BB 909
		Cc1cccc(OCC(O)=O)c1	BB 910
		Cn1ncc(C(O)=O)c1	BB 914
		OC(c(cn1)c(C(F)(F)F)nc1Cl)=O	BB 918
		OC(C1(CC1)F)=O	BB 919
		[O-][N+](c1cc(CC(O)=O)ccc1)=O	BB 92
		OC(CCc(cc1)ccc1I)=O	BB 926
		NC(C(CC1)CCC1(F)F)C(O)=O	BB 929
		OC(C(C1CC1)Br)=O	BB 931
		Cc1nc(C(F)(F)F)c(C(O)=O)s1	BB 932
		CS(c(cc(cc1)C(O)=O)c1F)(=O)=O	BB 936
		Nc(c(C(O)=O)cc(Cl)c1)c1I	BB 939
		OC(C(CC1)CNC1C(F)(F)F)=O	BB 941
		Nc1ncc(C(O)=O)s1	BB 942
		Cn(c(N)c1)nc1C(O)=O	BB 943
		OC(C(CC1)CC1(F)F)=O	BB 944
		COCC(C1)CC1C(O)=O	BB 946
		Cc1cc(Br)cc(OC)c1C(O)=O	BB 949
		CC(C)Oc(ccc(C(O)=O)c1)c1C(C)=O	BB 95
		CC1(CCC1)C(O)=O	BB 951
		CCc1c(C)sc(N)c1C(O)=O	BB 953
		OC(CCc(cc1)cc(F)c1Br)=O	BB 954
		OC(c(nc(C(F)(F)F)cc1)c1Br)=O	BB 957
		OC(c(c(Cl)cnc1Cl)c1Cl)=O	BB 959
		CC(C)(C)Nc1cc(C(O)=O)ncn1	BB 960
		OC(CC1CCOCC1)=O	BB 962
		Nc1cc(C(O)=O)cnc1O	BB 963
		Cc1noc(Cl)c1C(O)=O	BB 965
		CC(N(CCC1)C1C(O)=O)=O	BB 966
		OC(c1ccnc(Cl)c1Br)=O	BB 97
		COc(c(OC)c1)cc(C(O)=O)c1N	BB 971
		CC(C)(C(O)=O)c1ccc(C=C)cc1	BB 972
		Cc1cc(N)c(C(O)=O)s1	BB 974
		OC(c(cc(nc1)O)c1Br)=O	BB 976
		CC(c1nc(C(O)=O)ccc1)(F)F	BB 978
		Cc1cccc(I)c1C(O)=O	BB 986
		COc1n[nH]cc1C(O)=O	BB 987
		Cc1ccc(C(C(O)=O)N)cc1	BB 989
		Nc(cc1)c(C(O)=O)c(Br)c1I	BB 990
		Nc(cccc1)c1C(O)=O	BB 991
		OC(C1C(CF)C1)=O	BB 993
		Cc1cccc(CC(C(O)=O)N)c1	BB 996
O=C1CN(c2c(O)ccc(-c3cccc(N4CCCC[C@@H]4[C@H]4CC[C@@H]4NC(=O)[C@@H]4C[C@@H]4c4ccn[nH]4)c3)c2F)S(=O)(=O)N1	O=C1CN(c2c(O)cccc2F)S(=O)(=O)N1	OC(C(C(CC(C1)=O)c2ccccc2)C1=O)=O	BB 794	Amide Coupling	Acid	8
C[C@@H](NCCC(F)(F)F)c1cc(-c2ccc(O)c(N3CC(=O)NS3(=O)=O)c2F)ccc1COc1cc[nH]n1 CC(=O)Nc1cc(CCCn2ccccc2=O)cc(-c2ccc(O)c(N3CC(=O)NS3(=O)=O)c2F)c1 CC(C)CNc1cccc(CCNc2cccc(-c3ccc(O)c(N4CC(=O)NS4(=O)=O)c3F)n2)n1 CC(C)NCc1cc([C@@H]2CCCN2c2ccccn2)ccc1-c1ccc(O)c(N2CC(=O)NS2(=O)=O)c1F CCS(=O)(=O)Nc1cc(C(=O)Nc2ccccc2C)cc(-c2ccc(O)c(N3CC(=O)NS3(=O)=O)c2F)c1 CCS(=O)(=O)Nc1cc(O[C@@H]2C[C@H]2c2ccccc2)cc(-c2ccc(O)c…	NCCC(F)(F)F CC=O CC(C)CN CC(C)N CCS(N)(=O)=O CC[SH](=O)=O COCC[C@@H](C)N CCOC COCCS(N)(=O)=O NCC(F)F NS(=O)(=O)NCCC(F)(F)F	CCC(CCCCCCCCC(O)=O)=O	BB 101	Amide Coupling	Acid	9
		CCCC(C)CC(O)=O	BB 1065
		CC(C)C(C)C(O)=O	BB 1092
		CCC(C)CCCCCC(O)=O	BB 110
		OCCCCCC(O)=O	BB 1145
		CCCCCCCCCC(CCCCC(O)=O)=O	BB 1247
		OCCOCC(O)=O	BB 146
		CCC(CC)C(O)=O	BB 198
		CCC(CC)CCC(O)=O	BB 220
		CCN(CC)CC(O)=O	BB 244
		CC(C(C(O)=O)Br)Br	BB 279
		CC#CCCC(O)=O	BB 334
		CCCCCCC(C(O)=O)O	BB 366
		CC(OCC(O)=O)=O	BB 401
		CCCC(C(O)=O)OC	BB 410
		C/C=C/CC(O)=O	BB 428
		OC(C(Br)Br)=O	BB 458
		CC(C)(C(O)=O)OCC=C	BB 486
		CCCCC(C(O)=O)OC	BB 487
		CC(C)(C)CC(C(O)=O)N	BB 488
		CC(CCCCCCC=C)(C(O)=O)N	BB 494
		CCC(C(O)=O)OCC	BB 497
		C#CCC(C(O)=O)C(O)=O	BB 506
		CC(C(CCC(O)=O)C(C)=O)=O	BB 509
		OC(CC(CC(F)(F)F)=O)=O	BB 522
		OC(C(C(O)=O)Br)=O	BB 528
		OC(C(F)(F)S(F)(=O)=O)=O	BB 532
		CC(C(C(O)=O)C#N)=O	BB 574
		CCCCC(C(O)=O)O	BB 583
		CC(C(CC(O)=O)N)O	BB 592
		CNC(CCSC)C(O)=O	BB 596
		OC(C(F)(F)F)C(O)=O	BB 602
		CC(C)(CC(O)=O)O	BB 610
		CC(CO)(C(O)=O)N	BB 618
		OC(CCCNC(C(F)(F)F)=O)=O	BB 622
		CC(C(C(O)=O)NS(C(C)(C)C)=O)C=C	BB 628
		CC(C)C(C(C(O)=O)C(O)=O)=O	BB 631
		CCCNC(CCC(C(O)=O)NC)=O	BB 636
		CC(C)NCC(O)=O	BB 639
		NC(NCCCCC(O)=O)=N	BB 640
		OCC(C(O)=O)O	BB 643
		CCCCCC(NCC(O)=O)=O	BB 659
		NCC(NCC(NCC(O)=O)=O)=O	BB 661
		NC(CC(N)=O)CC(O)=O	BB 663
		CNC(CCC(N)=O)C(O)=O	BB 666
		NCC(CC(O)=O)=O	BB 668
		NCCCNCC(O)=O	BB 669
		CC(C)(C)C(C(O)=O)NC(C)=O	BB 672
		CC(C)NC(C(C)(C)O)C(O)=O	BB 675
		CC(OCC(C(O)=O)N)=O	BB 676
		NC(COS(O)(=O)=O)C(O)=O	BB 686
		CS(CC(O)=O)(=O)=O	BB 687
		OCC(C(C(O)=O)O)O	BB 691
		CC(CNC)C(O)=O	BB 694
		CN(C)S(CC(O)=O)(=O)=O	BB 699
		OC(CCC(C(F)(F)F)=O)=O	BB 700
		NC(CCCCNC(N)=N)C(O)=O	BB 701
		NC(CS(O)(=O)=O)C(O)=O	BB 704
		C#CCCC(NCCCCC(C(O)=O)N)=O	BB 707
		CCOC(C(CC(O)=O)=O)OCC	BB 716
		CC(C)(CCC(O)=O)N	BB 717
		CC(C(C)=O)C(O)=O	BB 718
		CC(SCC(CSC(C)=O)C(O)=O)=O	BB 722
		OCC(CC(O)=O)=O	BB 723
		NC(CC(F)(F)F)C(O)=O	BB 738
		OC(CC(CCC(F)(F)F)=O)=O	BB 754
		CC(CO)(CO)C(O)=O	BB 761
		CC(C)(C(O)=O)OC	BB 767
		COCCC(CC(O)=O)=O	BB 768
		CC(C)C(C(O)=O)C(O)=O	BB 776
		CCC(C(C(O)=O)(F)F)O	BB 779
		NC(CC(F)F)C(O)=O	BB 780
		C#CCOCCC(O)=O	BB 784
		NCC(C(O)=O)(F)F	BB 797
		OC(C(C(F)(F)F)(F)F)=O	BB 798
		CCCC(CCC)(C(O)=O)N	BB 805
		CC(CC#C)(C(O)=O)N	BB 818
		CC(C(O)=O)C#N	BB 821
		C#CCSCC(C(O)=O)N	BB 842
		CC(C)(CCOC(C)=O)C(O)=O	BB 855
		NC(CC(O)=O)C(F)(F)F	BB 859
		C=CCC(C(O)=O)(F)F	BB 862
		CC(C)(C(C(O)=O)N)SC	BB 887
		CC(C)CC(O)=O	BB 888
		CCCCOCC(O)=O	BB 904
		CC(C)C(C(O)=O)OC	BB 912
		OC(CSC(F)F)=O	BB 916
		CCCCCCCCCC(CC(O)=O)=O	BB 925
		CCCCC(C)CCC(O)=O	BB 940
		OCCN(CCO)CC(O)=O	BB 967
		C=CCCCCCCCCC(O)=O	BB 98
		CC(C)=CCCCC(O)=O	BB 981
		C#CCCCCCC(O)=O	BB 998
C[C@@]1(COCc2ccc(O)c(N3CC(=O)NS3(=O)=O)c2F)CC[C@H]1NC1(c2ccsn2)CSC1 C[C@@H](Oc1cccc(-c2ccc(O)c(N3CC(=O)NS3(=O)=O)c2F)c1)N1CCCC[C@@H]1c1ccn[nH]1 C[C@@H](OCc1cccc(N2CCCC2)n1)[C@@]1(c2ccc(O)c(N3CC(=O)NS3(=O)=O)c2F)C[C@@H]1c1ccccc1 C[C@@H]1C[C@H](N[C@H]2CC[C@@H]2c2ccccc2)CN[C@@H]1Cc1ccc(O)c(N2CC(=O)NS2(=O)=O)c1F C[C@@H]1CC[C@@H]([C@@H]2C[C@H]2S(=O)(=O)Nc2ccc(-c3ccc(O)c(N4CC(=O)NS4(=O)=O)c3F)cc2)N1 C[…	NC1(c2ccsn2)CSC1 c1cc([C@H]2CCCCN2)[nH]n1 OCc1cccc(N2CCCC2)n1 N[C@H]1CC[C@@H]1c1ccccc1 C[C@@H]1CC[C@@H]([C@@H]2C[C@H]2S(N)(=O)=O)N1 C[C@@H]1NC[C@@H]([C@H]2C[C@](C)(O)CN2)N1 C[C@@H]1NC[C@H](c2ccncc2CO)N1 Fc1cc([C@H]2CCN2)[nH]n1 C[C@H]1CC[C@@H]([C@@H]2C[C@H]2S(N)(=O)=O)N1 C[C@H]1NC[C@@H]([C@@H]2CCCC[C@@H]2O)N1 CC(=O)[C@@H]1CCN(c2ccnc(N)n2)C1 Cn1ccc([C@@H]2C[C@H]2C=O)c1 OC[C@H]1C[C@@H]1c1ccc(F)[nH]1…	OC(C1(CC1)c(cc1)cc(O2)c1OC2(F)F)=O	BB 251	Amide Coupling	Acid	10
		CCC(CC1)CCC1c(cc1)ccc1C(O)=O	BB 10
		COc(cccc1)c1-c1c(C(O)=O)scc1	BB 100
		OC(c(ccc(Br)c1)c1N1CCCC1)=O	BB 1009
		NC(Cc1ccc(C2CC2)cc1)C(O)=O	BB 1012
		OC(c1noc(-c2cncnc2)c1)=O	BB 1021
		OC(C(C1)CC1c1ccccc1)=O	BB 1047
		OC(C1(CC1)c(cc1)ccc1F)=O	BB 1053
		OC(c1nc(-c2ccccc2)cs1)=O	BB 1072
		OC(C(C1)C1c(cc1)ccc1F)=O	BB 1083
		OC(c1noc(-c(cc2)ccc2O)c1)=O	BB 1086
		OC(C1)(CC1C(O)=O)c1ccccc1	BB 1091
		OC(C1(CC1)c1cccc(Cl)c1)=O	BB 1095
		OC(C1(CCCC1)c(cc(cc1)Br)c1F)=O	BB 1099
		OC(C1(CC1)c(cc(cc1)Cl)c1Cl)=O	BB 1102
		OC(c1cnc(-c2ccccc2)s1)=O	BB 1108
		OC(C(C1)C1c1cccc(Br)c1)=O	BB 1111
		OC(c1csc(C2CC2)n1)=O	BB 1115
		Cc1cc(C)c(C(C2)C2C(O)=O)cc1	BB 1121
		COc(ccc(C(CNC1)C1C(O)=O)c1)c1OC	BB 113
		COc1cccc(C2(CCC2)C(O)=O)c1	BB 1137
		OC(Cc1cc(-c2ccccc2)ccc1)=O	BB 1144
		OC(c1cnc(-c2ccccc2)o1)=O	BB 1151
		COc1cc(C2(CC2)C(O)=O)cc(OC)c1	BB 1152
		CS(c(cc1)ccc1-c(cccc1)c1C(O)=O)(=O)=O	BB 1167
		Cn1c(-c(cc2)ccc2Cl)ccc1C(O)=O	BB 117
		Nc1nc(-c2cc(C(O)=O)ccc2)cs1	BB 1170
		Cc1cn(-c(cc2)ccc2C(O)=O)nc1	BB 1179
		COc1ccc(C(C2)C2C(O)=O)cc1	BB 1180
		OC(C1(CCCCC1)c(cccc1)c1F)=O	BB 120
		Cc(cc1)ccc1-c(cc1)ccc1C(O)=O	BB 1206
		Cc(c(-n1cccc1)ccc1)c1C(O)=O	BB 1213
		OC(c(nc1)cn1-c(cccc1)c1F)=O	BB 1215
		NC(Cc1ccc(C2CCCCC2)cc1)C(O)=O	BB 124
		OC(c1cc(C(F)(F)F)nn1-c1ccccc1)=O	BB 1255
		OC(c1cccc(-c(cccc2)c2OC(F)(F)F)n1)=O	BB 126
		Cc1cccc(C(C2)C2C(O)=O)c1	BB 1260
		OC(c1csc(N2CCNCC2)n1)=O	BB 1280
		OC(c(cc1)ncc1-c1c[nH]nc1)=O	BB 1281
		OC(c(cc1)cc(Cl)c1N1CCCC1)=O	BB 1285
		OC(c(ccc(F)c1)c1N1CCCC1)=O	BB 1289
		Nc1ccc(C2(CCCC2)C(O)=O)cc1	BB 1296
		OC(c(cc1)ccc1-c1cccc(C(F)(F)F)c1)=O	BB 1297
		Nc(oc(-c(cc1)ccc1C(O)=O)c1)c1C#N	BB 1301
		OC(c(cc1)ccc1N1CCNCC1)=O	BB 1304
		Cc(ccc(C1(CCCC1)C(O)=O)c1)c1OC	BB 1306
		Cc1cccc(C)c1-c(cc1)ccc1C(O)=O	BB 1316
		Cc1c(C(O)=O)nnn1-c(cc1)ccc1F	BB 132
		OC(C(CNC1)C1c1cccc(C(F)(F)F)c1)=O	BB 1320
		OC(c(cc1)nnc1N1CCOCC1)=O	BB 147
		Cc1cc(-c2cccs2)c(C(O)=O)[nH]1	BB 152
		Cn1c(-c2ccc(C(F)(F)F)cc2)ccc1C(O)=O	BB 153
		OC(c(cc(cc1)F)c1N1CCCC1)=O	BB 158
		OC(c1ccc(-c(cc2)ccc2OC(F)(F)F)o1)=O	BB 162
		OC(c([nH]cc1)c1-c1ccncc1)=O	BB 163
		Cc(cc(cc1)-c2cc(C(O)=O)no2)c1F	BB 176
		OC(C(C1)CN1C1CNC1)=O	BB 179
		OC(c(cc1)ccc1-n1nnnc1S)=O	BB 181
		COc1cccc(-n2ncc(C(O)=O)c2)c1	BB 193
		OC(c([nH]cc1)c1-c1ncccc1)=O	BB 201
		COc(ccc(-c1cc(C(O)=O)no1)c1)c1F	BB 205
		OC(c1cn(-c2ccccc2)nc1)=O	BB 218
		OC(c1noc(-c(cc(cc2)F)c2Cl)c1)=O	BB 221
		Cc1c(C(O)=O)sc(-c2cnccc2)n1	BB 223
		CCc1nc(-c2cccc(C(O)=O)c2)no1	BB 225
		OC(c1noc(-c2cc(C(F)(F)F)cc(Br)c2)c1)=O	BB 226
		OC(c1csc(-c2cnccc2)n1)=O	BB 228
		OC(C(C1)CNCC1c1ccccc1)=O	BB 231
		OC(c1n[nH]cc1-c1ccncc1)=O	BB 240
		OC(c(cc1)ccc1-c(cc1)ncc1Br)=O	BB 257
		OC(C(CC1)CCN1c(nc1)ncc1F)=O	BB 259
		Cc([nH]nc1C)c1-c1cccc(C(O)=O)c1	BB 26
		OC(c1n[nH]c(-c(cc2)ccc2F)c1)=O	BB 260
		OC(c1csc(-c(cc2)ccc2Cl)n1)=O	BB 262
		COc1cc(OC)c(C2(CC2)C(O)=O)cc1	BB 268
		Cc(cc1)cc(C(O)=O)c1-n1nncc1	BB 272
		Nc1ccc(-c2ccccc2)c(F)c1C(O)=O	BB 295
		COc1c(C2(CCCC2)C(O)=O)cccc1	BB 298
		OC(Cc(cc1)ccc1-c(cccc1)c1Cl)=O	BB 315
		Cc1cccc(-c2cccc(C(O)=O)c2)c1	BB 317
		OC(C1)CC1(C(O)=O)c(cc1)ccc1Br	BB 327
		OC(c(cc1)ccc1-c1ccccc1)=O	BB 338
		OC(c(nc(C1CC1)cc1)c1Br)=O	BB 349
		OC(C1(CC1)c1cccc(F)c1)=O	BB 352
		OC(c1noc(-c2cc(Br)cs2)c1)=O	BB 356
		OC(C1(COC1)c(cc1)ccc1Cl)=O	BB 357
		OC(c1nc(-c(cc2)cc(Cl)c2Cl)cs1)=O	BB 369
		OC(c1cnc(C2CC2)nc1Cl)=O	BB 372
		OC(c1n[nH]c(-c2cccs2)c1)=O	BB 373
		OC(CC(CC1)CCC1c1ccccc1)=O	BB 382
		OC(c(ccc(N1CCOCC1)c1)c1NC(C(F)(F)F)=O)=O	BB 386
		OC(c(cc1)cnc1-c1cccc(Cl)c1)=O	BB 391
		OC(c1noc(-c(c(Cl)c2)cc(F)c2Cl)c1)=O	BB 392
		OC(Cc1ccc(C2CC2)cc1)=O	BB 394
		OC(Cc(cc1)ccc1-n1nnnc1)=O	BB 404
		Cc1c(C(O)=O)sc(-c2ccccc2)n1	BB 405
		OC(c1noc(-c2ncccn2)c1)=O	BB 413
		OC(c1csc(-c(cc2)ccc2F)n1)=O	BB 423
		OC(C1(CCCC1)c(cccc1)c1F)=O	BB 438
		OC(c(cc1)ccc1-c1c[nH]nc1)=O	BB 45
		OC(c1cc(C2CC2)ncc1)=O	BB 457
		OC(c1c(C2CC2)onc1)=O	BB 459
		OC(C1(CC1)c1ccncc1)=O	BB 499
		CCn1c(-c2cc(C(O)=O)no2)ccc1	BB 50
		Nc1nc(-c2ccccc2)c(C(O)=O)s1	BB 52
		OC(c1cc(-c2ccco2)n[nH]1)=O	BB 547
		Cc(c(C(O)=O)c1O)nn1-c1ccccc1	BB 562
		CS(c(cc1)cc(N2CCCC2)c1C(O)=O)(=O)=O	BB 57
		OC(C1(CCCC1)c1cccc(F)c1)=O	BB 58
		OC(c(cc1)c(C2NCCC2)cc1F)=O	BB 587
		OC(C1(CC1)c1ncccc1)=O	BB 616
		OC(C(C1)C1c1cnccc1)=O	BB 63
		OC(C1(CCCC1)c1ccccc1)=O	BB 66
		Cc(cc1)cc(C(O)=O)c1-n1nccn1	BB 715
		Nc(n(-c(cc1)ccc1F)nc1)c1C(O)=O	BB 730
		Cc(cc1)cc(-c2ccccc2)c1C(O)=O	BB 79
		OC(c1cc(-n2nnnc2)ccc1)=O	BB 80
		OC(c1cccc(-n2ncc(Br)c2)c1)=O	BB 800
		COc(cc1)cc(-c2cccc(C(O)=O)c2)c1O	BB 802
		OC(C(C1)C1c1ncccc1)=O	BB 815
		OC(c(nc1)nn1-c1ncccc1)=O	BB 825
		OC(c(cc(cc1)-n2cccc2)c1O)=O	BB 839
		Cc1cccc(-c2cc(C(O)=O)no2)n1	BB 86
		Cc1nccc(-c(ccc(Cl)c2)c2F)c1C(O)=O	BB 879
		Cc1ccc(C2(CC2)C(O)=O)cc1	BB 894
		[O-][N+](c1cc(Br)cnc1-c(cc1)ccc1C(O)=O)=O	BB 9
		OC(C1(COC1)c1ccccc1)=O	BB 901
		COc1ccc(C2(CC2)C(O)=O)cc1	BB 906
		OC(C1(CC1)C1CC1)=O	BB 913
		N#Cc(cc1)ccc1-c1cc(C(O)=O)cnc1	BB 917
		[O-][N+](c(cc1)ccc1-c1cc(C(O)=O)n[nH]1)=O	BB 923
		OC(c1noc(-c2ccc(C(F)(F)F)cc2)c1)=O	BB 937
		OC(c1noc(-c2cccs2)c1)=O	BB 938
		OC(Cc(cc1)cc(F)c1-c1ccccc1)=O	BB 947
		COc1cccc(C2(CC2)C(O)=O)c1	BB 955
		OC(C1(CC1)c1cccc(Cl)c1F)=O	BB 956
		OC(C1(CCCC1)c1cccc(Cl)c1F)=O	BB 96
		Nc1cc(-c(cc2)ccc2C(O)=O)cnc1	BB 99
		OC(c1ccnn1C1CC1)=O	BB 992
		COc(c(-c1cc(C(O)=O)no1)ccc1)c1Br	BB 994
N#C[C@@H]1C[C@@H](c2ccc(O)c(N3CC(=O)NS3(=O)=O)c2F)N[C@H]1N1CCC[C@@H]1[C@H]1C[C@@H]1NC1CC1	C1CN[C@@H]([C@H]2C[C@@H]2NC2CC2)C1	OC(C(C1)NCC1N1CCN(Cc2ccccc2)CC1)=O	BB 37	Amide Coupling	Acid	11
O=C1CN(c2c(O)ccc(-c3cccc(N4CCC[C@@H]4C(=O)N4CCC[C@H]4[C@H]4C[C@H]4Oc4ccccc4)c3)c2F)S(=O)(=O)N1 O=C1CN(c2c(O)ccc(-c3cn([C@@H]4C[C@@H]4C(=O)[C@H]4C[C@H]4c4ccn[nH]4)cc3F)c2F)S(=O)(=O)N1	c1ccc(O[C@@H]2C[C@@H]2[C@@H]2CCCN2)cc1 O=C([C@@H]1CC1)[C@H]1C[C@H]1c1ccn[nH]1					12
C[C@H]([C@H]1COCCc2cc(-c3ccc(O)c(N4CC(=O)NS4(=O)=O)c3F)ccc21)N1CCCC(=O)N1 C[C@H]1CC(=O)[C@@H](CN[C@H]2[C@H](c3ccc(O)c(N4CC(=O)NS4(=O)=O)c3F)[C@H]2[C@H]2CCCN2c2ccccc2)N(C)N1 C[C@H]1NN(C)C(=O)[C@H]1CN[C@@H]1C[C@H]1[C@@H]1CCN1c1ccccc1-c1ccc(O)c(N2CC(=O)NS2(=O)=O)c1F C[C@H]1NNC(=O)[C@@H]1CN[C@@H]1C[C@H]1[C@@H]1CCCN1c1ccc(-c2ccc(O)c(N3CC(=O)NS3(=O)=O)c2F)cc1 Cc1cc(=O)[nH]n1NC[C@]1(O)C[C@@H]1c1cccc(-c2…	O=C1CCCNN1 C[C@H]1CC(=O)[C@@H](CN)N(C)N1 C[C@H]1NN(C)C(=O)[C@H]1CN C[C@H]1NNC(=O)[C@@H]1CN Cc1cc(=O)[nH]n1N Cc1ccc(O)[nH]c1=O Cn1ccc(=O)c(CN)c1 Cn1cccc(CN)c1=O Cn1cnc(N)c(C#N)c1=O COc1ccc(CN)c(=O)[nH]1 N#CCn1cnc(N)c(C#N)c1=O NCc1ccc[nH]c1=O Nc1ccc(=O)[nH]c1	CC(C(CC(CC1)C(O)=O)C1=O)=O	BB 106	Amide Coupling	Acid	13
		CC(NC(C=C1)=O)=C1C(O)=O	BB 1190
		OC(C(C=C(C(F)(F)F)N1)=CC1=O)=O	BB 157
		OC(C(CC(C1)C(F)(F)F)CC1=O)=O	BB 212
		OC(C(C(N1)=O)=CC=C1Br)=O	BB 215
		CC(N1)=CN=C(C(O)=O)C1=O	BB 239
		CC(C)(C)C(N1)=NC=C(C(O)=O)C1=O	BB 242
		OC(C1=CC=NNC1=O)=O	BB 328
		CC(N=CN1CCC(O)=O)=CC1=O	BB 347
		OC(C(ON1)=CC1=O)=O	BB 377
		OC(C(CN1)OC1=O)=O	BB 381
		OC(C1=CC(I)=CNC1=O)=O	BB 399
		OC(C(N=CNC1=O)=C1Cl)=O	BB 406
		OC(C(CCCCCC1)C1=O)=O	BB 442
		CC(C)N(CC(C1)C(O)=O)C1=O	BB 454
		CC(CCN1)(C(O)=O)C1=O	BB 465
		OC(C(C=NN1)=CC1=O)=O	BB 480
		OC(CC(CCCC1)C1=O)=O	BB 538
		OC(C1OCCCC1=O)=O	BB 551
		OC(C(CC(N1)=O)NC1=O)=O	BB 570
		CN(CCC1C(O)=O)C1=O	BB 597
		CN(C(C(Br)=C1)=O)C(Cl)=C1C(O)=O	BB 61
		[O-][N+](C(C=C1Br)=C(C(O)=O)NC1=O)=O	BB 677
		OC(C(CC1)NC1=O)=O	BB 689
		OC(C(CN1)NC1=O)=O	BB 708
		NC(CC1)(CC1=O)C(O)=O	BB 711
		CC(COCC1)(C(O)=O)C1=O	BB 741
		OC(CN(CCC1)C1=O)=O	BB 781
		CC(N1)=C(C(O)=O)SC1=O	BB 893
		CCC1=CC(C(O)=O)=NNC1=O	BB 935
		OC(C(CC(N1)=O)CC1=O)=O	BB 948
		OC(C(C1)CNCC1=O)=O	BB 997
C[C@@H]1C[C@@H](C(=O)CCNc2cccc(-c3ccc(O)c(N4CC(=O)NS4(=O)=O)c3F)c2)[C@H](C)N1 C[C@H](CNc1cccc(-c2ccc(O)c(N3CC(=O)NS3(=O)=O)c2F)c1)[C@H](F)[C@H]1CN[C@@H](N)N1 CC(=O)CCOc1cccc(NCc2cccc(-c3ccc(O)c(N4CC(=O)NS4(=O)=O)c3F)c2)n1 CC(C)(CCNc1ccc(-c2ccc(O)c(N3CC(=O)NS3(=O)=O)c2F)cn1)c1cccc(N)n1 CC(C)c1ccc(C(=O)NCCn2ccc([C@@H](C)Cc3ccc(O)c(N4CC(=O)NS4(=O)=O)c3F)n2)cc1 CO[C@H](C)CNc1cccc(NS(=O)(=O)Cc2cccc(-c…	C[C@@H]1C[C@@H](C(=O)CCN)[C@H](C)N1 C[C@H](CN)[C@H](F)[C@H]1CN[C@@H](N)N1 CC(=O)CCOc1cccc(N)n1 CC(C)(CCN)c1cccc(N)n1 CCNC(=O)c1ccc(C(C)C)cc1 CO[C@H](C)CNc1cccc(N)c1 COC[C@H](CCN)c1cc(C)n[nH]1 COC[C@H](N)c1ccon1 N#Cc1cccc([C@H](O)CCN)n1	CCC1(CCC1)C(O)=O	BB 1005	Amide Coupling	Acid	14
		OC(CC(c1cccc(Br)c1)=O)=O	BB 1013
		CC(C)(C)c1ccc(CC(CC(O)=O)N)cc1	BB 1027
		OC(C(C(O)=O)c1cc(Br)ncc1)=O	BB 1029
		COc(cc1)cc(OCCC(O)=O)c1OC	BB 104
		CC(C)(Cc(cc1)ccc1Br)C(C(O)=O)C(O)=O	BB 1056
		N#Cc1cccc(C(CC(O)=O)=O)c1	BB 1058
		CSc(cc1)ccc1OCCC(O)=O	BB 1060
		COc(cc1)c(C(CC(O)=O)N)cc1Br	BB 1074
		CC(CC(O)=O)C(c(cc1)ccc1N)=O	BB 1101
		COc1ccc(C[Se]CC(C(O)=O)N)cc1	BB 1173
		CC(C)(CO)C(C(N(CCCC1)C1C(O)=O)=O)=O	BB 1211
		N#CC(Cc(ccc(Br)c1)c1F)C(O)=O	BB 1231
		OC(CCCCc1cccs1)=O	BB 1232
		CCNS(c(cc1)ccc1C(O)=O)(=O)=O	BB 1282
		N#CC(Cc(cc(cc1)[N+]([O-])=O)c1F)C(O)=O	BB 1286
		CC(C)N(CCC(O)=O)c1ccccc1	BB 1288
		CC(C)(C)C(C(O)=O)c1ccccc1	BB 1291
		CC(C)Oc1ccc(CC(C(O)=O)C#N)cc1	BB 1295
		CC(CCC(O)=O)c1ccccc1	BB 137
		COc(cc1)cc(CC(C(O)=O)C#N)c1OC	BB 139
		C=CCCOc(cc1)ccc1C(O)=O	BB 154
		OC(CC(c1cc(Cl)cc(Cl)c1)=O)=O	BB 161
		OC(CC1(COC1)F)=O	BB 178
		COc1ccc(CCCCC(O)=O)cc1	BB 186
		NC(CC(O)=O)c(cc(cc1)[N+]([O-])=O)c1F	BB 199
		NC(CC(O)=O)c(cccc1)c1[N+]([O-])=O	BB 206
		COCCOc(cc1)ncc1C(O)=O	BB 214
		OC(CC1(CCNCC1)F)=O	BB 235
		COc(c(OCCCC(O)=O)c1)cc(CO)c1[N+]([O-])=O	BB 249
		COC1(C(CC(O)=O)CC1)OC	BB 275
		CN(CC(O)=O)Cc1ccccc1	BB 276
		OC(CCCc(cccc1)c1O)=O	BB 292
		OC(CC(c(cc1)ccc1I)=O)=O	BB 326
		OC(CC(C1CCNCC1)=O)=O	BB 335
		NCC1(CC(O)=O)CCCCC1	BB 359
		COc1ccc(CSCC(C(O)=O)N)cc1	BB 371
		COc1ncc(C(CC(O)=O)N)cc1	BB 412
		CC(C(N(Cc1ccccc1)C(C)C(O)=O)=O)N	BB 419
		Cc1cc(C)c(C(CC(O)=O)N)c(C)c1	BB 430
		CN(CC(C(O)=O)N)Cc1ccccc1	BB 436
		Cc1cccc(OCCC(O)=O)c1	BB 439
		CC(CCc1ccccc1)C(O)=O	BB 440
		NC(CC(O)=O)c(cc1)ccc1O	BB 462
		Cc1ccc(C[Se]CC(C(O)=O)N)cc1	BB 471
		CCCCC(c(cccc1)c1C(O)=O)O	BB 478
		Cc(cc1)ccc1S(OCC(O)=O)(=O)=O	BB 485
		NC(CSc(cccc1)c1[N+]([O-])=O)C(O)=O	BB 493
		Cc1c(C(CC(O)=O)N)cccc1	BB 502
		OC(C(CCCc1ccccc1)C(O)=O)=O	BB 503
		OCC1(CCNCC1)C(O)=O	BB 504
		CC1(CCOCC1)C(C(O)=O)N	BB 526
		COc(c(OC)c1)cc(C(CC(O)=O)N)c1[N+]([O-])=O	BB 535
		[O-][N+](c(cc1)cc([N+]([O-])=O)c1NCCCC(O)=O)=O	BB 545
		NC(COCc1ccccc1)C(O)=O	BB 546
		CC(CC(O)=O)c(c(O)ncn1)c1O	BB 566
		NC(CC(O)=O)c(ccc(O)c1)c1O	BB 578
		OC(CNC(c1cccc(C(F)(F)F)c1)=O)=O	BB 594
		CC(C(C(O)=O)N)Oc(cccc1)c1N	BB 605
		COC1(CNC1)C(O)=O	BB 608
		CCCNC(CCC(C(O)=O)NC(c1ccccc1)=O)=O	BB 619
		OC(CNC(c(cc1)ccc1Cl)=O)=O	BB 630
		CC(NC(CSC(c1ccc(C)cc1)=O)C(O)=O)=O	BB 635
		NC(C1(CC1)C(O)=O)=O	BB 638
		OC(CC(NNC(Nc(cc1)cc(Cl)c1F)=O)=O)=O	BB 644
		OC(CC(C1CNC1)=O)=O	BB 645
		CSCCC(C(NC(Cc(cc1)ccc1O)C(O)=O)=O)N	BB 646
		CNC1(CC1)C(O)=O	BB 648
		NCC(NC(Cc1ccccc1)C(O)=O)=O	BB 658
		CC(C(O)=O)NC(C(Cc1c[nH]cn1)N)=O	BB 662
		NC(C1)CNC1C(NC(CO)C(O)=O)=O	BB 665
		OC(CNC(c(cc1)cc(Cl)c1Cl)=O)=O	BB 685
		Nc(cc1)c(CNCC(O)=O)c(Cl)c1Cl	BB 695
		CC(Nc1cc(F)c(C)cc1CCCC(O)=O)=O	BB 702
		Cn1c(C(CC(O)=O)(C(F)(F)F)O)ncc1	BB 713
		NC(CCC(O)=O)c1ccccc1	BB 742
		NC(CCCC(O)=O)c1ccccc1	BB 746
		CCCC1(C(O)=O)NCCC1	BB 752
		NC(CC(O)=O)C1CC1	BB 755
		NC(CC(O)=O)Cc1cc(O)ccc1	BB 762
		NC(C(c1ccccc1)O)C(O)=O	BB 772
		OCC1(CCOCC1)C(O)=O	BB 795
		OC(CC(O)=O)(C(F)F)c(cc1)ccc1Cl	BB 799
		OC(C(F)(F)F)(C(O)=O)c1ccccc1	BB 803
		OC(CC(c(cccc1)c1Br)=O)=O	BB 816
		NC(CCC(OCc(cccc1)c1[N+]([O-])=O)=O)C(O)=O	BB 822
		NC(CC(O)=O)Cc1cccc(Cl)c1Cl	BB 823
		NC(CC(O)=O)Cc1cc(Cl)cc(Cl)c1	BB 824
		OC(CCC(c1ccccc1)=O)=O	BB 827
		NC(CC(O)=O)Cc1cccc(F)c1F	BB 830
		COc1ccc(CCCC(O)=O)cc1	BB 832
		OC(CCC(OCc1ccccc1)=O)=O	BB 834
		CN(C)C(Cc1c[nH]cn1)C(O)=O	BB 836
		NC(CC(O)=O)Cc(cc1)cc(Cl)c1F	BB 838
		NC(CC(O)=O)Cc(c(F)c1)cc(F)c1F	BB 848
		CN(C)C1(COC1)C(O)=O	BB 849
		CC(C)(C(C(O)=O)OC(C)=O)c(cccc1)c1O	BB 850
		OC(C(Cc1cccs1)C(O)=O)=O	BB 854
		OCC1(CCNCC1)C(O)=O	BB 856
		OC(C1(CC1)C(F)(F)F)=O	BB 860
		COCCc(cc1)ccc1OCC(C(O)=O)O	BB 861
		COc1ccc(CCC(C(O)=O)N)cc1	BB 864
		OC(C1(CF)CNC1)=O	BB 868
		NC(CC(O)=O)Cc(ccc(Cl)c1)c1Cl	BB 889
		COc(cccc1)c1C(CC(O)=O)=O	BB 890
		NC(C(c1ccccc1)=O)C(O)=O	BB 892
		CC(c(cc(c(OCCCC(O)=O)c1)OC)c1[N+]([O-])=O)O	BB 90
		OC(CCOc1cccc(Cl)c1)=O	BB 905
		N#CC1(CCCCC1)C(O)=O	BB 920
		N#CCC(C(O)=O)c1ccccc1	BB 924
		CCC1(CCNCC1)C(O)=O	BB 933
		CCC(C(O)=O)N1CCCC1	BB 934
		COc1cccc(C(CC(O)=O)N)c1	BB 970
		OC(C1(CNC1)C(F)(F)F)=O	BB 979
		NC(CC(O)=O)Cc(cc1)ccc1[N+]([O-])=O	BB 980
		OC(CCCC(OCc1ccccc1)=O)=O	BB 982
		NC(CC=Cc1ccccc1)C(O)=O	BB 983
		C=CCC1(CCC1)C(O)=O	BB 985
		NC(CC(O)=O)Cc(cc1)ccc1I	BB 988
Cc1ccc2cc(C(=O)N3C[C@@H]4CN(c5ccc(O)c(N6CC(=O)NS6(=O)=O)c5F)C[C@@H]4C3)[nH]c2c1 Cc1nc2c(o1)CCC[C@@H]2S(=O)(=O)Nc1cccc(-c2ccc(O)c(N3CC(=O)NS3(=O)=O)c2F)c1 Cn1nc(O)c2c1[C@H](NC[C@@H]1C[C@H](c3ccc(O)c(N4CC(=O)NS4(=O)=O)c3F)CN1c1ccccc1)CCC2 Cn1ncc2c1CCC[C@H]2S(=O)(=O)Nc1ccc(-c2ccc(O)c(N3CC(=O)NS3(=O)=O)c2F)cc1F COc1ccc2c(C(=O)NC3CC4(C3)CN(c3ccc(O)c(N5CC(=O)NS5(=O)=O)c3F)C4)c[nH]c2c1 NC(=O)c1cnc2c(c1)…	Cc1nc2c(o1)CCC[C@@H]2[SH](=O)=O Cn1nc(O)c2c1[C@H](N)CCC2 Cn1ncc2c1CCC[C@H]2S(N)(=O)=O NC(=O)c1cnc2c(c1)NCCC2 N[C@@H]1NC[C@H]2C[C@H](F)CC[C@H]2N1 N[C@@H]1NC[C@H]2C[C@@H](F)CC[C@@H]2N1 N[C@@H]1CCCc2ccccc21 O[C@H]1NNC[C@H]2CCC[C@H]21 NS(=O)(=O)[C@@H]1CCC[C@H]2CNC[C@H]21 OC[C@H]1CCC[C@@H]2NN[C@H]12	COc(c1ccccc1cc1)c1C(O)=O	BB 1	Amide Coupling	Acid	15
		OC(c1cc2cc(Br)cn2cn1)=O	BB 1002
		OC(c1ccc2n1ncnc2)=O	BB 1018
		N#Cc(cc1)cc2c1c(C(O)=O)c[nH]2	BB 1026
		OC(c(nc1cc2)cn1nc2Cl)=O	BB 1028
		OC(CCc1c[nH]c2c1cccn2)=O	BB 103
		OC(Cc1cc2ccccc2cc1)=O	BB 1032
		OC(c1c(cn[nH]2)c2ccc1)=O	BB 1037
		OC(c1c[nH]c2c1cccc2)=O	BB 1038
		OC(Cc(c1c2)c[nH]c1cc(F)c2F)=O	BB 1041
		CC(c1ccc(cc(cn2)C(O)=O)c2c1)=O	BB 1044
		OC(c1c[nH]c2cc(Br)cc(F)c12)=O	BB 1057
		OC(CN(CC1)Cc2c1cccc2)=O	BB 1062
		OC(c1noc2c1cccc2)=O	BB 1066
		Nc(cc(cn[nH]1)c1c1)c1C(O)=O	BB 1069
		OC(CCc1c[nH]c(cc2)c1cc2F)=O	BB 1070
		COc1c2c(C(O)=O)cccc2ccc1	BB 1077
		OC(c1c[nH]c2cccnc12)=O	BB 1079
		OC(c1cc(O)c(cc(cc2)F)c2c1)=O	BB 1080
		OC(c(cc1)cc2c1nco2)=O	BB 1081
		OC(c1ccc(cc(cc2)Br)c2n1)=O	BB 1089
		Cc1cn(cc(cc2)C(O)=O)c2n1	BB 1094
		CC(CCC1)c2c1sc(N)c2C(O)=O	BB 1096
		OC(Cc1c[nH]c2cccc(Cl)c12)=O	BB 1097
		OC(Cc1csc(cc2)c1cc2Cl)=O	BB 1098
		OC(C1c2cccc(Br)c2OC1)=O	BB 1100
		Cc1nc(cc(cc2)C(O)=O)c2n1C	BB 1103
		OC(c1cc2ncccc2cc1)=O	BB 1105
		OC(c1ccc(cncc2Br)c2n1)=O	BB 111
		OC(c(c(CCCC1)c1cc1)c1O)=O	BB 1114
		COc(cc1)cc2c1[nH]cc2C(O)=O	BB 1119
		OC(c1cc2nccc(Cl)c2s1)=O	BB 1128
		Cc1cccc2c1[nH]cc2C(O)=O	BB 1131
		OC(c1coc2c1COC2)=O	BB 1132
		COc(cc1)cc2c1c(C(O)=O)c[nH]2	BB 1136
		OC(c1cn2c(Br)cccc2n1)=O	BB 1139
		OC(c1ccc2ncc(Br)cn12)=O	BB 1140
		OC(c(cc1)cc2c1ncs2)=O	BB 1142
		OC(c1cc(Br)cn2c1ncc2)=O	BB 1148
		OC(c1cn(cc(C(F)(F)F)cc2)c2n1)=O	BB 1149
		Cc(cc1)cc2c1[nH]nc2C(O)=O	BB 1153
		OC(c1cc(OCCC2)c2cc1)=O	BB 1155
		OC(c1cc(CCCC2)c2s1)=O	BB 116
		Cn1nnc2c1ccc(C(O)=O)c2	BB 1161
		NC(Cc1c(CCCC2)c2ccc1)C(O)=O	BB 1165
		Nc1nc2cc(C(O)=O)ccc2c(Cl)n1	BB 1168
		Cc1c2c(C(O)=O)n[nH]c2ccc1	BB 1169
		OC(Cc1c[nH]c2c1cccn2)=O	BB 1181
		OC(c1cnc2[nH]ncc2c1)=O	BB 1192
		Cc1c(C(O)=O)c(cc[nH]2)c2nc1	BB 1197
		CCc(cc1)cc2c1[nH]c(C)c2CC(O)=O	BB 1198
		OC(c1cnc(ccc(I)c2)c2c1Cl)=O	BB 1199
		OC(c1cc2cccnc2c(C(F)(F)F)c1)=O	BB 12
		OC(c1cn(cc(nc2Br)Br)c2n1)=O	BB 1201
		OC(c(c1ccc2)n[nH]c1c2Cl)=O	BB 1208
		OC(c1c(ccc(C(F)(F)F)n2)c2ccc1)=O	BB 1212
		OC(c1cnc2[nH]ccc2c1)=O	BB 1218
		CC(C)c1nc(cc(cc2)C(O)=O)c2[nH]1	BB 122
		CC(C1)=C(CC(O)=O)c2c1ccc(OC)c2	BB 1222
		OC(c(nc(c1c2)Cl)nc1ccc2Cl)=O	BB 1223
		OC(c1c[nH]c2c1ccc(F)n2)=O	BB 1225
		Nc1ccc(cc(cc2)C(O)=O)c2n1	BB 123
		OC(c(cc1)cc2c1OCC2)=O	BB 1240
		OC(c1cc(O)c2OCOc2c1)=O	BB 1241
		OC(c1cc(scc2)c2s1)=O	BB 1244
		OC(c1cc(CNCC2)c2s1)=O	BB 1245
		Nc1c(C(O)=O)c(CCCC2)c2s1	BB 1249
		Cc(cc1[nH]cc(C(O)=O)c1c1)c1Br	BB 125
		Cn1nc(C(O)=O)c2c1cncc2	BB 1250
		OC(c1cc(cccc2)c2s1)=O	BB 1251
		[O-][N+](c1cc(C(O)=O)c2OCCc2c1)=O	BB 1252
		OC(c1nc2cnccc2c(Cl)c1)=O	BB 1254
		OC(c1cccc2cc(O)cnc12)=O	BB 1256
		OC(c(c1ccc2)cccc1c2O)=O	BB 1259
		OC(c1cccc2nc(O)ccc12)=O	BB 1261
		Cc(c1cc(F)c2)c(C(O)=O)oc1c2F	BB 1262
		OC(C(CC1)c2c1cccc2)=O	BB 1264
		OC(CC1c(c(Cl)c(cc2Cl)Cl)c2OC1)=O	BB 127
		OC(c(nc1n2CCNC1)c2Br)=O	BB 1272
		OC(c1cccc2ccccc12)=O	BB 1276
		OC(c(cnc1c2cc[nH]1)c2Cl)=O	BB 1279
		OC(C1c(cccc2)c2NCC1)=O	BB 1283
		OC(c(c1c2)cc(Cl)nc1ccc2F)=O	BB 129
		Cc1cccc2c1OCC2CC(O)=O	BB 1290
		COc1c(C(F)(F)F)c2cccc(C(O)=O)c2cc1	BB 1293
		N#Cc1c(CC(O)=O)c(cccc2)c2[nH]1	BB 1294
		Cc1c2c(C(O)=O)cccc2ccc1	BB 13
		Cn1c(cccc2)c2c(C(O)=O)c1	BB 1302
		OC(c1cc(ccc(Cl)c2)c2s1)=O	BB 1305
		OC(C(c1cccc2ccccc12)(F)F)=O	BB 1307
		OC(c1cc(CNC2)c2cc1)=O	BB 1308
		[O-][N+](/C=C/c1c[nH]c2cc(F)cc(C(O)=O)c12)=O	BB 1309
		Cc(cccc12)c2ncc(C(O)=O)c1Cl	BB 1312
		COc1cc(C(O)=O)cc2ccncc12	BB 1315
		OC(c(c1ccccc11)ccc1O)=O	BB 1317
		Cn1c(ccc(Br)c2)c2c(C(O)=O)c1	BB 1319
		OC(Cc1c(cc[nH]2)c2ccc1)=O	BB 1321
		OC(c1c(cn[nH]2)c2cc(Cl)c1)=O	BB 135
		OC(C(C1)OCc2c1cccc2)=O	BB 138
		OC(c1cnc(cc(cc2)Cl)c2c1)=O	BB 149
		CCOc(cc1)cc2c1[nH]cc2C(O)=O	BB 167
		Cc(ccc1c2c(CC(O)=O)c[nH]1)c2Br	BB 169
		OC(c(c1ccccc11)cnc1Cl)=O	BB 17
		OC(c1nsc2c1ccc(Br)c2)=O	BB 173
		Cc1c(C(O)=O)n(cccc2O)c2n1	BB 174
		Cc(n1C)cc2c1ncnc2C(O)=O	BB 182
		OC(c1cc(Br)c(cc[nH]2)c2n1)=O	BB 190
		OC(c1ccc(cc(cn2)Cl)c2c1)=O	BB 192
		N#Cc(cc1)cc2c1[nH]nc2C(O)=O	BB 203
		COc1c(cc(cc2)C(O)=O)c2ncc1	BB 204
		OC(CC1c(ccc(Cl)c2)c2OC1)=O	BB 207
		OC(c1cccc(s2)c1nc2Br)=O	BB 209
		OC(c1nc(ccc(Br)c2)c2s1)=O	BB 210
		Cn1nc(C(O)=O)c2c1CCNC2	BB 216
		Cc(cc(c(CC(O)=O)c[nH]1)c1c1)c1Br	BB 227
		OC(c(cc1)c2OCCOc2c1Br)=O	BB 229
		OC(c1c2[nH]ccc2cc(C(F)(F)F)c1)=O	BB 230
		OC(c1cc(ccc(Br)c2)c2o1)=O	BB 241
		OC(c(n(CCNC1)c1n1)c1Br)=O	BB 245
		OC(c1ccc(ccc(Br)c2)c2c1)=O	BB 246
		Cn1c(nccc2)c2c(C(O)=O)c1	BB 247
		OC(c(c1ccccc11)ccc1Br)=O	BB 25
		[O-][N+](c1cc2ccc(C(O)=O)nc2cc1)=O	BB 267
		Cc(cc1)cc2c1c(C(O)=O)c[nH]2	BB 269
		OC(c1c(cc(cn2)F)c2ccc1)=O	BB 27
		OC(c1cn(cccc2)c2n1)=O	BB 273
		Cn(c1ccc2)ncc1c2C(O)=O	BB 274
		OC(c1n[nH]c2c1CCNC2)=O	BB 280
		OC(c1c(CCCC2)n2nc1)=O	BB 281
		OC(c1c(ccc(Cl)c2)n2nc1)=O	BB 282
		COc(cc1)cc2c1c(CCC(O)=O)c[nH]2	BB 284
		OC(CCc1ncc2n1CCNC2)=O	BB 285
		Nc1nn(ccc(C(O)=O)c2)c2n1	BB 296
		OC(CCc1c[nH]c2cccc(Br)c12)=O	BB 297
		OC(C(C1)NCc(cc2)c1cc2O)=O	BB 299
		OC(c(nc1[nH]ccc1c1)c1Br)=O	BB 300
		Cc1c(C(O)=O)n2nc(C)ccc2n1	BB 301
		Cc1cc(C)nc2nc(C(O)=O)nn12	BB 309
		OC(c(nc1n2CCNC1)c2Br)=O	BB 31
		OC(Cc1noc2c1ccc(Br)c2)=O	BB 313
		OC(c1csc2c1cccc2)=O	BB 314
		COc1c(C(O)=O)c(cc[nH]2)c2nc1	BB 325
		OC(CCc(c(Br)c1Br)cc2c1OCC2)=O	BB 33
		OC(c1cc(Br)cn2c1nnc2)=O	BB 331
		Cn1nc(C(O)=O)c2c1nccc2	BB 336
		NC(CC1)c2c1ccc(C(O)=O)c2	BB 337
		OC(c1cc(Cl)cc2ncccc12)=O	BB 34
		OC(c1c2nc[nH]c2cc(F)c1)=O	BB 341
		CC(c1c(cc(cn2)C(O)=O)c2ccc1)=O	BB 344
		OC(c1c(cc(cc2)Br)n2nc1)=O	BB 345
		OC(c1cnc2sccn12)=O	BB 351
		OC(c1nn(cccn2)c2n1)=O	BB 360
		NC(CC1=CN=C2NC=CC=C12)C(O)=O	BB 364
		COc1ccc(cc(c(C(O)=O)c2)O)c2c1	BB 368
		OC(c1n[nH]c2c1cccn2)=O	BB 375
		OC(c1c2ncccn2nc1)=O	BB 388
		OC(c1n[nH]c2c1COCC2)=O	BB 389
		[O-][N+](c(c1ccc2)cccc1c2C(O)=O)=O	BB 39
		Nc1nc2cccc(C(O)=O)c2s1	BB 40
		NC(Cc1ccnc2ccccc12)C(O)=O	BB 402
		OC(c1c(cccc2)c2no1)=O	BB 409
		OC(c1n[nH]c2c1CNCC2)=O	BB 414
		OC(c1c[nH]c2c1ncnc2Cl)=O	BB 415
		OC(c1c(CCC2)n2nc1)=O	BB 417
		OC(c1ccc2ncc(F)cc2c1)=O	BB 418
		Cc1cc(ccc(C(O)=O)c2)c2[nH]1	BB 421
		OC(c1cn(CCCC2)c2n1)=O	BB 43
		Cc1c(C(O)=O)n(ccc(Cl)c2)c2n1	BB 432
		OC(c(cc1[nH]ccc1c1)c1F)=O	BB 437
		Nc1cc(c(C(O)=O)c[nH]2)c2nc1	BB 444
		Cc1cccc2c1nc(C(O)=O)[nH]2	BB 449
		COc1cccc2c1cc(C(O)=O)[nH]2	BB 460
		Cc(cc1)cc2c1[nH]cc2C(O)=O	BB 47
		Nc1c(c(C(O)=O)c[nH]2)c2ncn1	BB 473
		OC(c(ccc1c2nn[nH]1)c2Br)=O	BB 48
		OC(C1(C2)C2NCC1)=O	BB 481
		OC(Cc1c(cccn2)c2n[nH]1)=O	BB 484
		OC(C(C1)NCc2c1ccc(O)c2)=O	BB 492
		OC(c1c(cccc2)n2nc1)=O	BB 515
		OC(c1cccn2c1ncc2)=O	BB 518
		OC(c1c(CCNC2)c2n[nH]1)=O	BB 519
		C=CCc1c(C(O)=O)[nH]c2c1cccc2	BB 524
		OC(c1cnc2c(Cl)cccc2c1O)=O	BB 529
		OC(c1cc2cc(O)ccc2nc1)=O	BB 53
		OC(c(c(F)c1Br)cc2c1occ2)=O	BB 54
		OC(c1c[nH]c2c1cncc2)=O	BB 542
		[O-][N+](c1c2[nH]c(C(O)=O)cc2cc(F)c1)=O	BB 544
		OC(c1cc2cccc(Cl)c2[nH]1)=O	BB 553
		OC(c1cnc2c(F)cccc2c1O)=O	BB 576
		OC(c1cccc2c1[nH]nc2I)=O	BB 577
		Cc1c(C(O)=O)[nH]c2c1cccc2	BB 585
		OC(c([nH]c1c2)cc1cnc2Br)=O	BB 599
		CCn1ncc2c1ncc(C(O)=O)c2Cl	BB 6
		OC(c1cc(scc2)c2[nH]1)=O	BB 603
		OC(c(ccc1ccccc11)c1O)=O	BB 606
		OC(C12NCCC1C2)=O	BB 609
		OC(c1nc(CCCC2)c2[nH]1)=O	BB 614
		OC(c1cc(nccc2)c2[nH]1)=O	BB 620
		[O-][N+](c(cc1)cc2c1[nH]c(C(O)=O)n2)=O	BB 621
		OC(c1cc2cc(F)cc(F)c2[nH]1)=O	BB 626
		Cc(cc1)cc2c1[nH]c(C(O)=O)c2	BB 632
		COc(cc1)cc2c1[nH]c(C(O)=O)c2	BB 637
		OC(c1nn(CCCC2)c2c1)=O	BB 64
		OC(c([nH]c1c2)nc1cc(Cl)c2Cl)=O	BB 641
		Cc1nc([nH]c(C(O)=O)c2)c2cc1	BB 647
		COc(cc1)nc2c1c(C(O)=O)n[nH]2	BB 65
		Cc1cc([nH]c(C(O)=O)c2)c2cc1	BB 651
		OC(c([nH]1)cc2c1ncnc2)=O	BB 653
		OC(c1cc2cc(Cl)cc(Cl)c2[nH]1)=O	BB 654
		OC(c([nH]c1c2)cc1cc(F)c2Cl)=O	BB 657
		OC(c1cc2cc(C(F)(F)F)cnc2[nH]1)=O	BB 664
		OC(c([nH]c(cc1)c2cc1Br)c2O)=O	BB 667
		Cc(cc1)cc2c1c(Cl)c(C(O)=O)s2	BB 67
		OC(c1cc(cccc2O)c2[nH]1)=O	BB 670
		OC(c1cc(cccc2)c2[nH]1)=O	BB 671
		OC(c([nH]c1c2)cc1cc(F)c2F)=O	BB 680
		Cc1cccc2c1[nH]c(C(O)=O)c2	BB 682
		Cc(cc1)cc2c1[nH]c(C(O)=O)c2N	BB 684
		COc(c(OC)c1)cc2c1[nH]c(C(O)=O)c2	BB 688
		OC(c1cc(Br)c2OCOc2c1)=O	BB 69
		OC(c1cc(cc(C(F)(F)F)cc2)c2[nH]1)=O	BB 693
		OC(c1cc(ccnc2)c2[nH]1)=O	BB 696
		CCOc(cc12)ccc2ncc(C(O)=O)c1O	BB 697
		OC(c1cc(C(F)(F)F)nc2ccccc12)=O	BB 70
		Nc1ccc(CC(O)=O)c2ccccc12	BB 71
		OC(c([nH]c1cc(F)c2)cc1c2F)=O	BB 710
		OC(C(C1)Nc2c1cccc2)=O	BB 720
		OC(c1cncc2cccc(O)c12)=O	BB 726
		COc(c([nH]nc1)c1cc1)c1C(O)=O	BB 73
		OC(c1c2[nH]ncc2cc(Br)c1)=O	BB 734
		OC(c1nc(cccc2)c2[nH]1)=O	BB 765
		OC(c1cnc(cc(cn2)Br)c2c1Cl)=O	BB 77
		Cc(c1ncc2)c(C(O)=O)[nH]c1c2Cl	BB 770
		OC(C12OCCCC1CNC2)=O	BB 771
		OC(c1cc(c(Br)c(cc2)Cl)c2[nH]1)=O	BB 793
		Nc1c(C(O)=O)sc2nccnc12	BB 806
		Cc(c1ncc(C(O)=O)c(O)c1cc1)c1Cl	BB 807
		OC(Cn1c2ncccc2cc1)=O	BB 808
		OC(c1cc(cc(cc2)F)c2s1)=O	BB 81
		[O-][N+](c(cc1)c2[nH]c(C(O)=O)cc2c1F)=O	BB 811
		Nc1c(C(O)=O)sc2c1cc(C(F)(F)F)cc2	BB 813
		OC(c1n[nH]c2cc(Br)cnc12)=O	BB 814
		Nc1c(C(O)=O)sc2ncccc12	BB 840
		OC(c1n[nH]c2cccnc12)=O	BB 843
		OC(c(nc1)nn2c1ccc2)=O	BB 858
		Cc(cc1[nH]ncc1c1)c1C(O)=O	BB 87
		NC(Cc1c[nH]c2cccc(F)c12)C(O)=O	BB 874
		Nc1c(C(O)=O)sc2c1cncc2	BB 875
		OC(c1cc(O)c(cc[nH]2)c2c1)=O	BB 877
		OC(c(nc1ncccn11)c1Br)=O	BB 89
		Cn1nc(C(O)=O)c2c1cnc(Cl)n2	BB 91
		OC(Cc(c1ccc2)n[nH]c1c2Br)=O	BB 915
		Nc1c(cc(cc2)Cl)c2nnc1C(O)=O	BB 922
		COc(c(OC)c1)cc2c1[nH]nc2CC(O)=O	BB 927
		OC(C1C2C1COC2)=O	BB 930
		OC(c1cc(Cl)c(cc(cc2)Br)c2n1)=O	BB 94
		OC(CC12)CC2C1C(O)=O	BB 945
		Cn1nc(ccc(Br)c2)c2c1C(O)=O	BB 950
		OC(c1ncc2c(I)cccc2c1O)=O	BB 958
		OC(c(cc1nc2Cl)ccc1nc2Cl)=O	BB 961
		OC(c1cc2nccnc2cc1)=O	BB 964
		OC(c1c(CCCC2)c2c[nH]1)=O	BB 969
		OC(c1c(ccc(Br)c2)c2nc(O)c1)=O	BB 977
		OC(c1c(cc(cc2)Cl)n2nc1)=O	BB 984
		[O-][N+](c(cc1)cc2c1c(C(O)=O)n[nH]2)=O	BB 995
		OC(c1cc2cccnc2s1)=O	BB 999
O=C1CN(c2c(O)ccc(-c3ccc(F)c(NCC[C@]4(F)C[C@H]4c4ccn[nH]4)c3)c2F)S(=O)(=O)N1 O=C1CN(c2c(O)ccc(-c3cccc(O[C@H](CCO)c4ccc(C5CC5)[nH]4)c3C(F)F)c2F)S(=O)(=O)N1	NCC[C@]1(F)C[C@H]1c1ccn[nH]1 OCC[C@@H](O)c1ccc(C2CC2)[nH]1	COC(C1)(CC1(C(O)=O)c1cccc(Br)c1)OC	BB 1277	Amide Coupling	Acid	16
		OC(CC(c(cc1)ccc1N1CCOCC1)=O)=O	BB 362
O=C1CN(c2c(O)ccc(-c3cnn(Cc4cccc(N5CC6(CCCC[C@H]6O)C5)n4)c3)c2F)S(=O)(=O)N1	O[C@@H]1CCCCC12CNC2	OC(C(C1)C11COCCC1)=O	BB 1122	Amide Coupling	Acid	17
		OC(C1CC2(CNC2)OCC1)=O	BB 1176
		OC(C1CC2(CNCC2)CCC1)=O	BB 1265
		OC(C(CC1)CCC11CNCCC1)=O	BB 1275
		OC(C(CC1)CCC11CCOCC1)=O	BB 1284
		OC(C(C1)C1(C1(Cl)Cl)C1(Cl)Cl)=O	BB 145
		CS(N1CC(C2)(CC2C(O)=O)C1)(=O)=O	BB 148
		OC(C1CNC2(COC2)C1)=O	BB 78
		OC(C(C1)C11COC1)=O	BB 837
		CC1(C2(CC2)CNC1)C(O)=O	BB 907
		OC(C1CC2(CCC2)C1)=O	BB 911
C[C@H](N[C@@H]1C[C@H](c2ccc(O)c(N3CC(=O)NS3(=O)=O)c2F)Cc2ccccc21)c1ccc(=O)n(C2CC2)n1 O=C1CN(c2c(O)ccc([C@H]3CCN(c4ccccc4)[C@H]3[C@@H]3C[C@@H]3NC[C@@H]3N[C@H](C4CC4)CCC3=O)c2F)S(=O)(=O)N1	C[C@H](N)c1ccc(=O)n(C2CC2)n1 NC[C@@H]1N[C@H](C2CC)CCC1=O	OC(C(N=C(N1)N2CCOCC2)=CC1=O)=O	BB 1266	Amide Coupling	Acid	18
CC[C@@H](c1ccc(-c2ccc(O)c(N3CC(=O)NS3(=O)=O)c2F)cc1)n1cnc(C(N)=O)c1 Cc1cc(C)n(CCc2ccccc2N[C@H]2C[C@@H](c3ccc(O)c(N4CC(=O)NS4(=O)=O)c3F)C2)n1 Cc1cc(Cc2cnn(Cc3cc(F)c(-c4ccc(O)c(N5CC(=O)NS5(=O)=O)c4F)cc3F)c2)on1 Cc1cn(CC[C@H]2C[C@H](c3ccc(O)c(N4CC(=O)NS4(=O)=O)c3F)CN2c2ccccn2)cc1C(N)=O COc1cccc(Cc2ccn(Cc3cccc(-c4ccc(O)c(N5CC(=O)NS5(=O)=O)c4F)c3F)n2)c1 NC(=O)c1ccn(C[C@]2(F)C[C@@H]2c2cc(-c3ccc(O)c(N4C…	NC(=O)c1cncn1 Cc1cc(C)nn1 Cc1cc(Cc2cnnc2)on1 Cc1cncc1C(N)=O COc1cccc(Cc2ccnn2)c1 NC(=O)c1ccnc1 NC(=O)c1cnnc1 O=c1ccccn1 O=S(=O)(Nc1ccnn1)c1ccccc1 c1cc([C@@H]2CCCc3nncc32)n[nH]1 O=c1ccn[nH]1 FC(F)(F)CSc1ccnn1 O=c1cc(CO)n[nH]1					19
O=C1CN(c2c(O)ccc(-c3cccc(C(=O)N[C@H]4CC[C@]45CCN(c4nccs4)C5)c3)c2F)S(=O)(=O)N1	N[C@H]1CC[C@]12CCN(c1nccs1)C2	OC(C(C1)CC11COC(c2ccccc2)OC1)=O	BB 1174	Amide Coupling	Acid	20
